# Supplementary material for: One-pot construction of dispirocyclohexanes via K2CO3-mediated desulfonylative Michael–Michael–aldol (2 + 2 + 2) annulation of sulfonyl 2-pyridyl flavanones and methylketones
Source: Royal Society of Chemistry journal article supplement (doi:10.1039/d0ob01404d), 2020-01-01
Supplement: d0ob01404d1.pdf [file d0ob01404d1.pdf]

# Supporting Information

## One-pot Construction of Dispirocyclohexanes via K<sub>2</sub>CO<sub>3</sub>-Mediated Desulfonylative Michael-Michael-aldol (2+2+2) Annulation of Sulfonyl 2-Pyridyl Flavanones and Methylketones

Meng-Yang Chang,<sup>\*a,b</sup> Kuan-Ting Chen<sup>a</sup> and Han-Yu Chen<sup>a</sup>

<sup>a</sup>Department of Medicinal and Applied Chemistry, Kaohsiung Medical University, Kaohsiung 807, Taiwan

<sup>b</sup>Department of Medical Research, Kaohsiung Medical University Hospital, Kaohsiung 807, Taiwan

\*Corresponding authors: [mychang@kmu.edu.tw](mailto:mychang@kmu.edu.tw)

### Table of Contents

|                                                                                                       |               |
|-------------------------------------------------------------------------------------------------------|---------------|
| 1. <sup>1</sup> H NMR and <sup>13</sup> C NMR spectra copies of compounds <b>2a-2x</b>                | SI-2~SI-49    |
| 2. <sup>1</sup> H NMR and <sup>13</sup> C NMR spectra copies of compounds <b>3a-3w, 3y-3ac</b>        | SI-50~SI-105  |
| 3. <sup>1</sup> H NMR and <sup>13</sup> C NMR spectra copies of compounds <b>4a, 4ac, 5a</b>          | SI-106~SI-111 |
| 4. <sup>1</sup> H NMR, <sup>13</sup> C NMR and <sup>2</sup> H NMR spectra copies of compound <b>6</b> | SI-112~SI-116 |
| 5. <sup>1</sup> H NMR and <sup>13</sup> C NMR spectra copies of compounds <b>3y-1, 3y-2</b>           | SI-117~SI-120 |
| 6. X-ray crystal data of compounds <b>2a, 3a, 3i, 3j, 3o, 3r, 3y</b> and <b>3y-1</b>                  | SI-121~SI-136 |

# Compound 2a (<sup>1</sup>H-NMR spectral data)

HANBr35

Pulse Sequence: s2pu1  
UNITYplus-400 "unity400"  
Date: Mar 6 2018  
Solvent: CDCl<sub>3</sub>  
Ambient temperature  
Total 32 repetitions

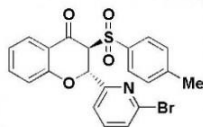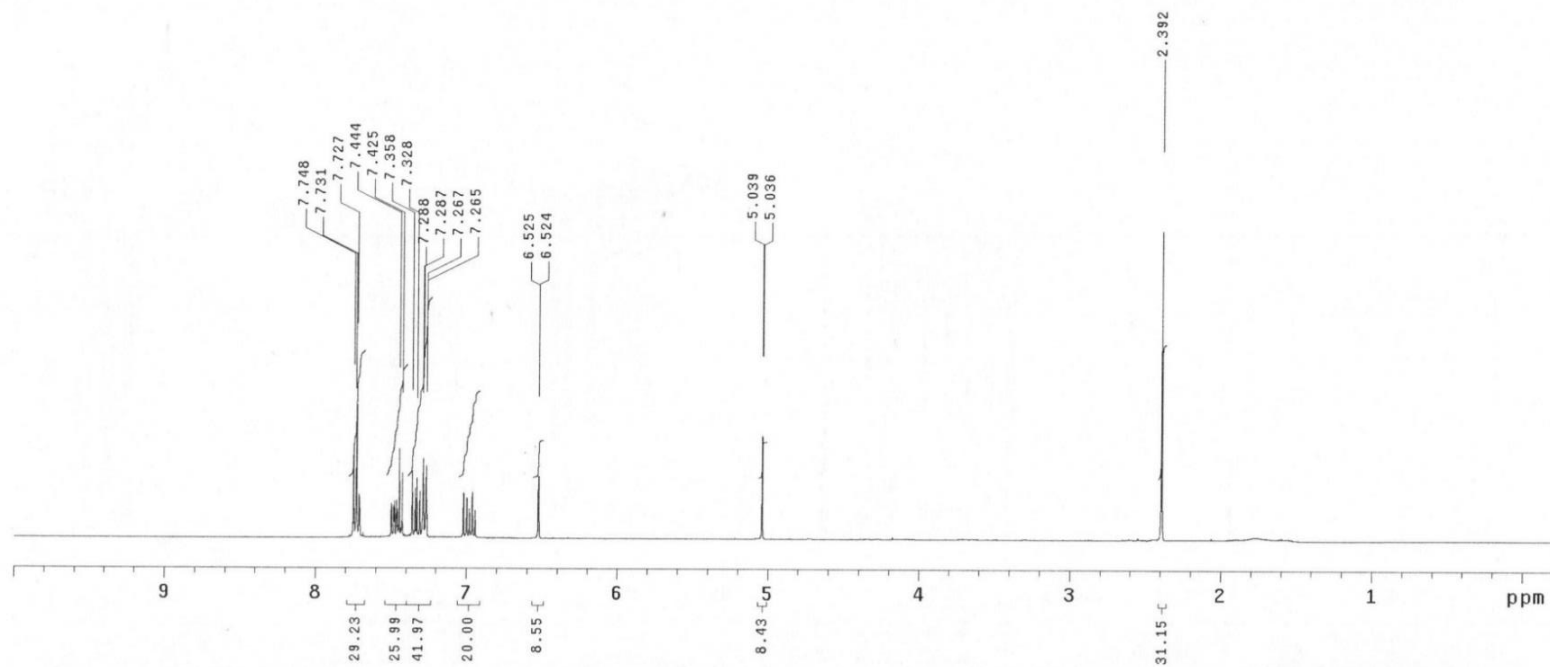

# Compound 2a (<sup>13</sup>C-NMR spectral data)

HANBr35

Pulse Sequence: s2pu1  
UNITYplus-400 "unity400"  
Date: Mar 6 2018  
Solvent: CDCl3  
Ambient temperature  
Total 528 repetitions

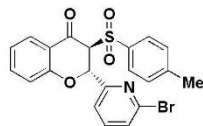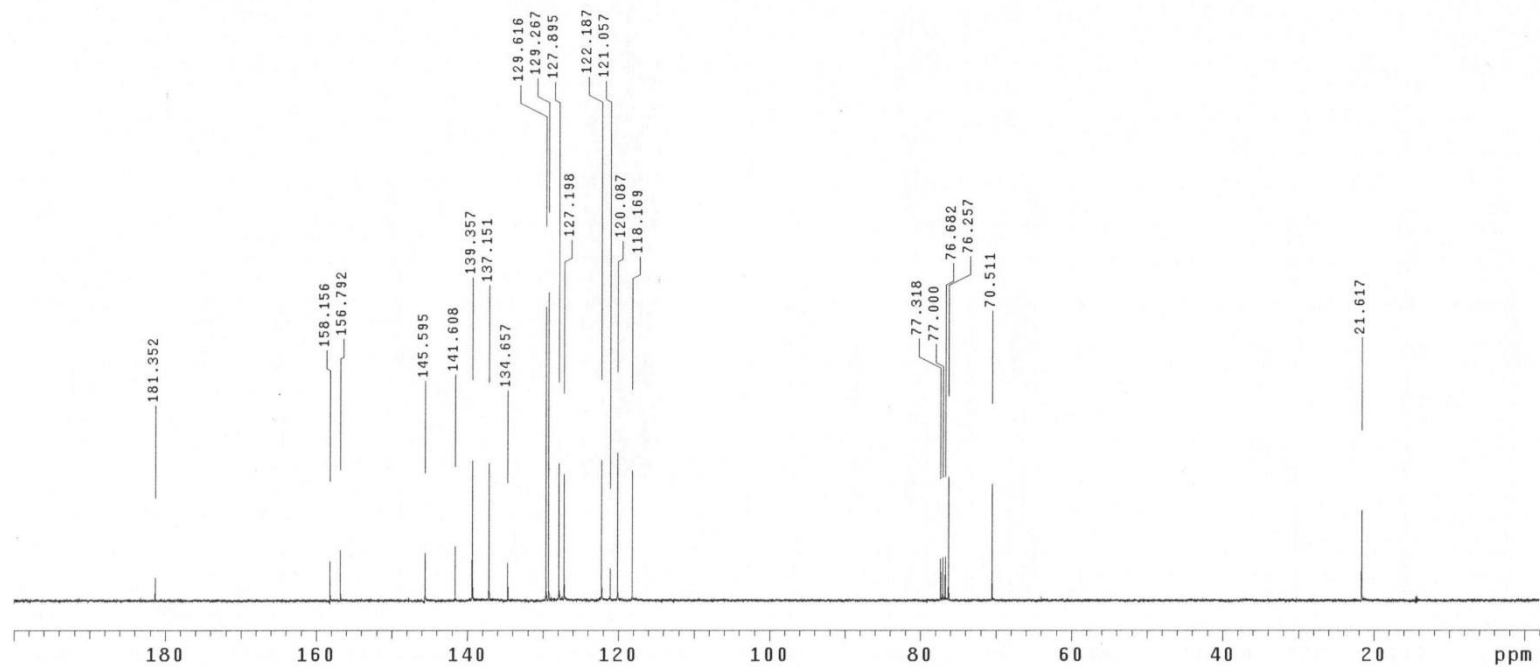

# Compound 2b (<sup>1</sup>H-NMR spectral data)

HAFPYBr

Pulse Sequence: s2pu1  
UNITYplus-400 "unity400"  
Date: Jul 30 2018  
Solvent: CDC13  
Ambient temperature  
Total 32 repetitions

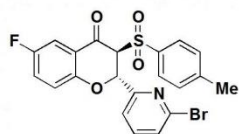

*trans* : *cis* > 10 : 1

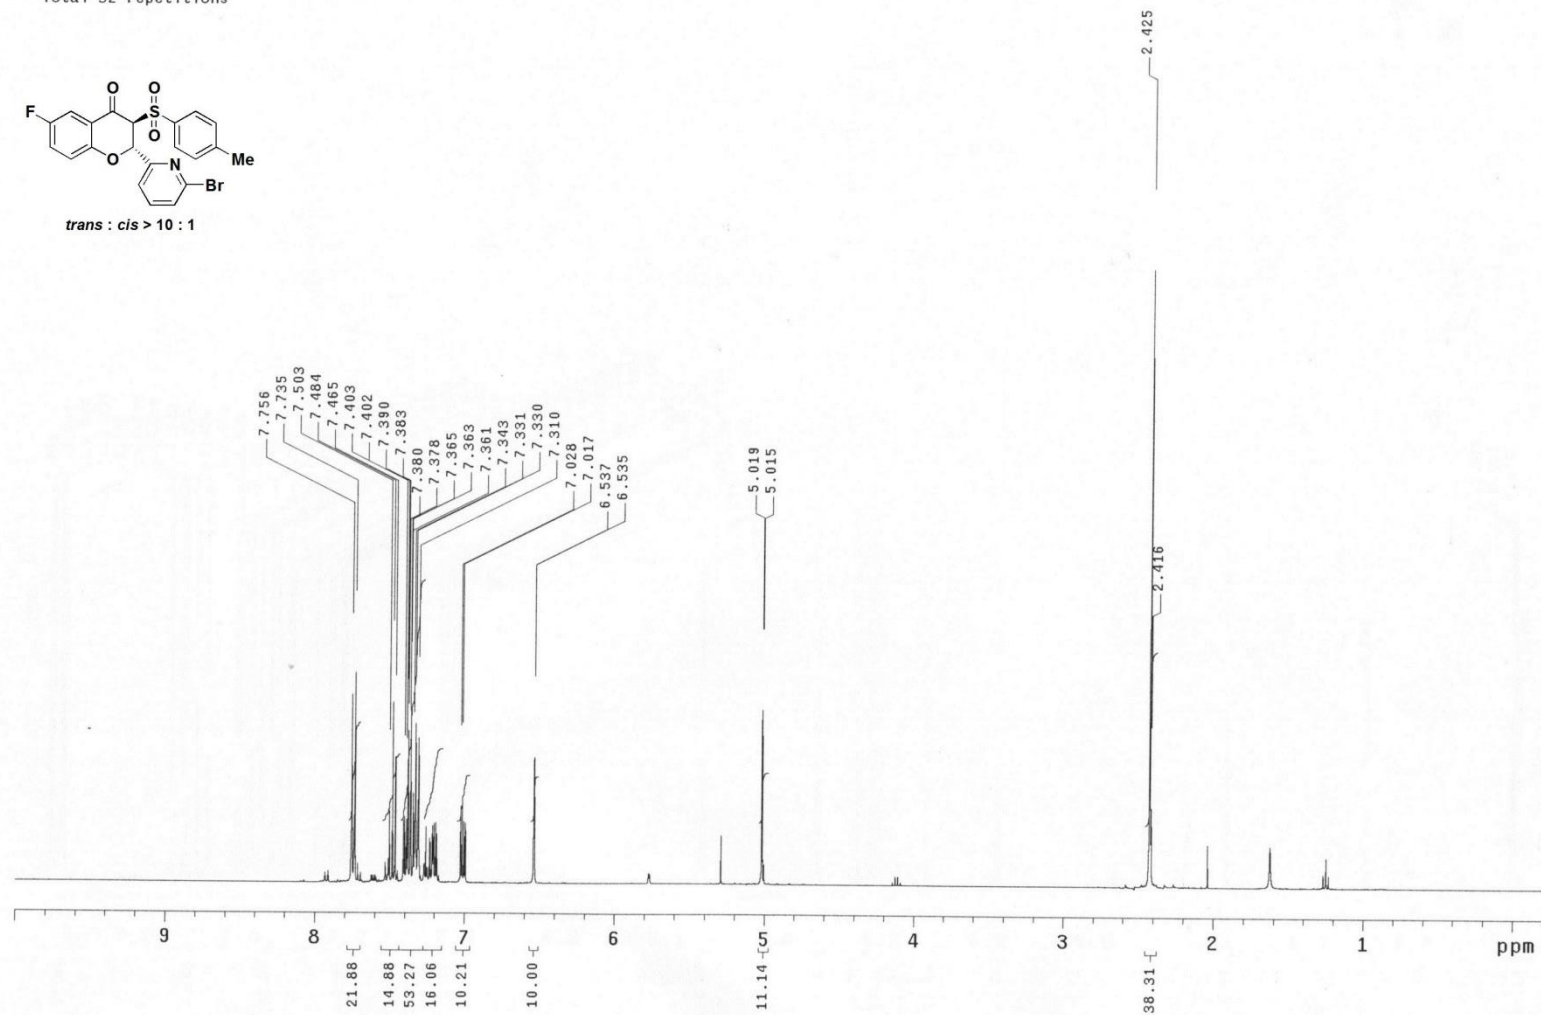

# Compound 2b (<sup>13</sup>C-NMR spectral data)

HAFPYBr

Pulse Sequence: s2pu1  
UNITYplus-400 "unity400"  
Date: Jul 30 2018  
Solvent: CDCl<sub>3</sub>  
Ambient temperature  
Total 880 repetitions

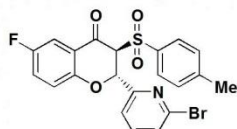

*trans* : *cis* > 10 : 1

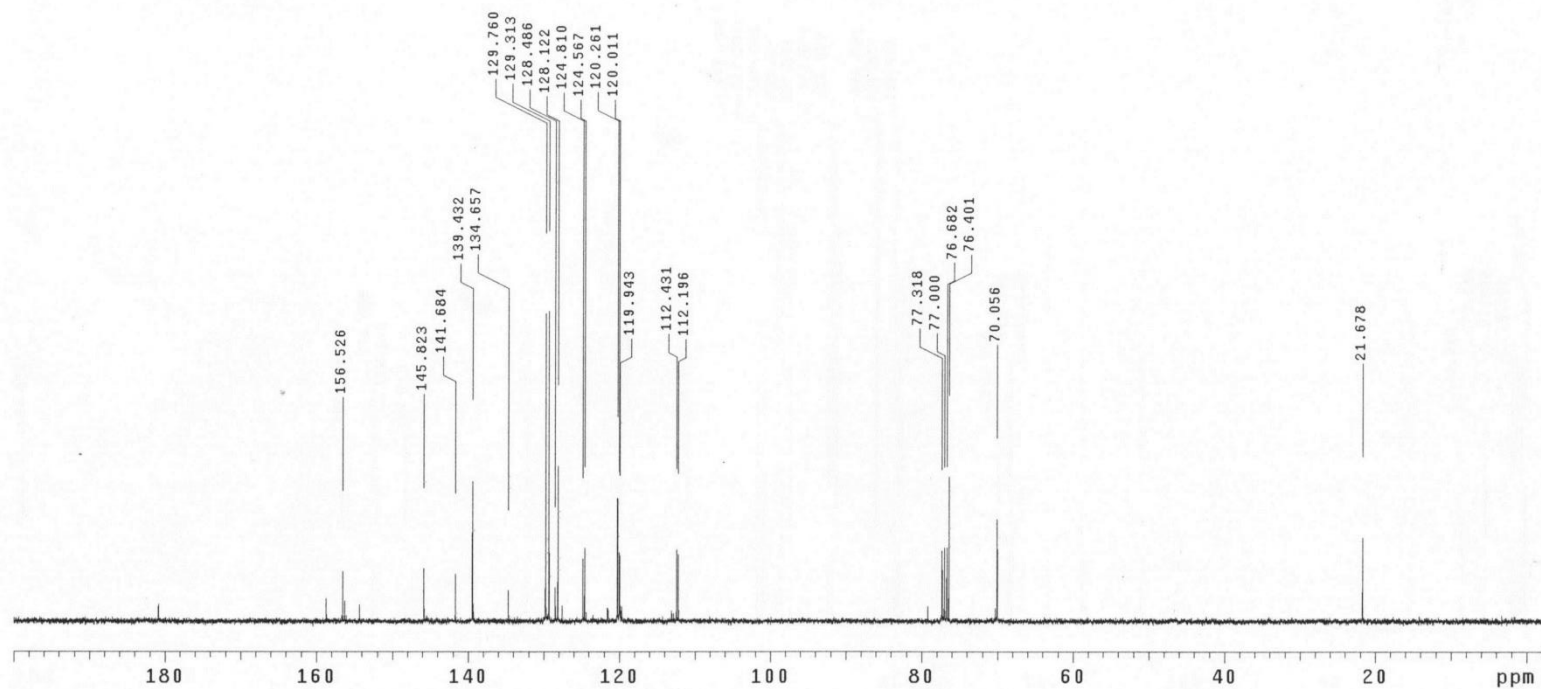

# Compound 2c (<sup>1</sup>H-NMR spectral data)

HABrN50

Pulse Sequence: s2pu1

UNITYplus-400 "unity400"

Date: Apr 16 2018

Solvent: CDCl<sub>3</sub>

Ambient temperature

Total 32 repetitions

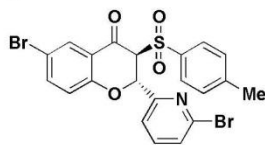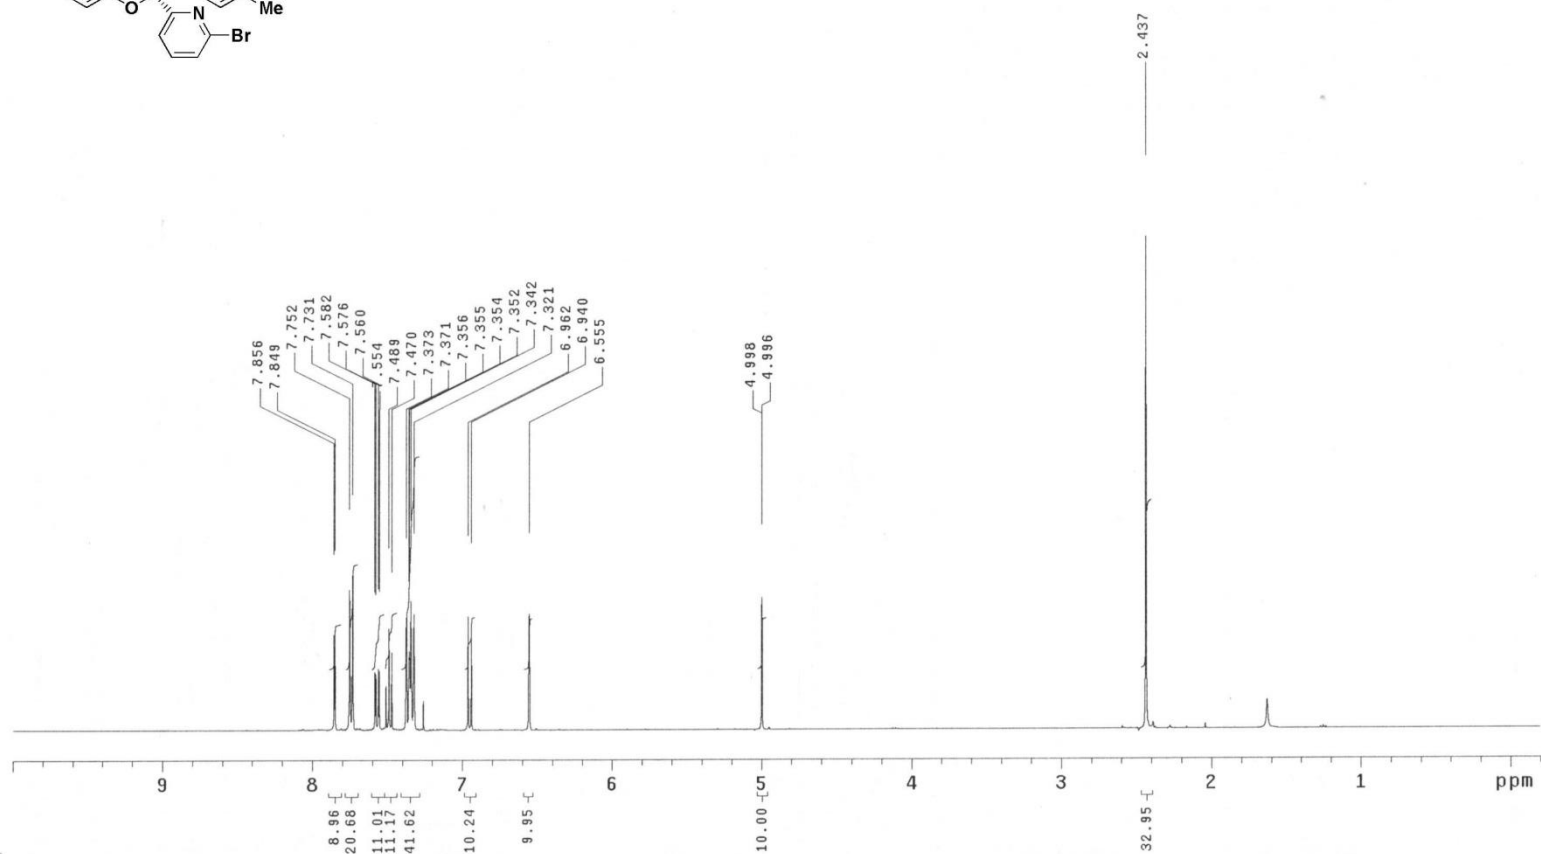

# Compound 2c (<sup>13</sup>C-NMR spectral data)

HABrN50  
Pulse Sequence: s2pu1  
UNITYplus-400 "unity400"  
Date: Apr 16 2018  
Solvent: CDC13  
Ambient temperature  
Total 752 Repetitions

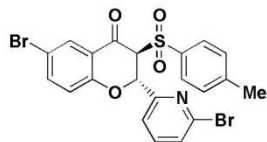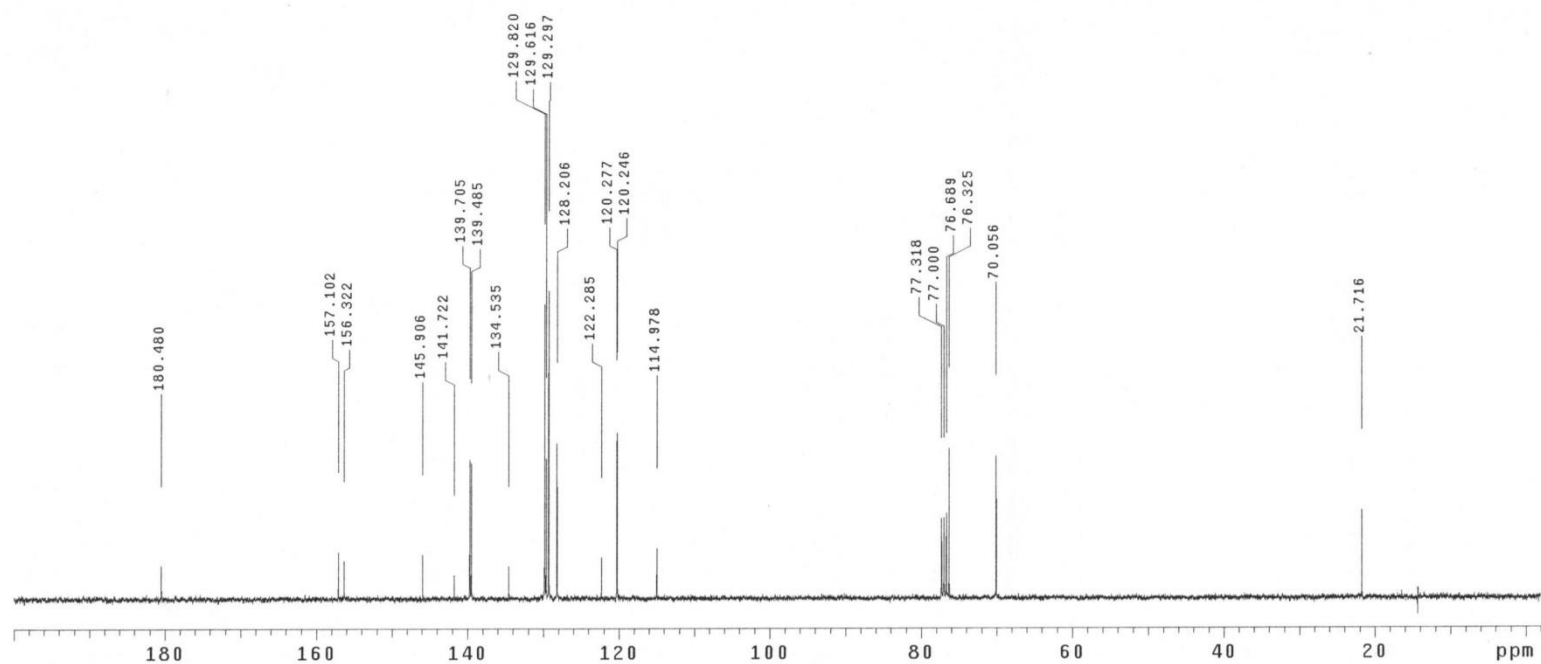

# Compound 2d (<sup>1</sup>H-NMR spectral data)

HAC150

Pulse Sequence: s2pu1  
UNITYplus-400 "unity400"  
Date: Apr 18 2018  
Solvent: CDCl<sub>3</sub>  
Ambient temperature  
Total 32 repetitions

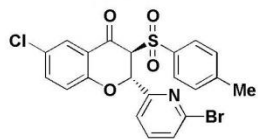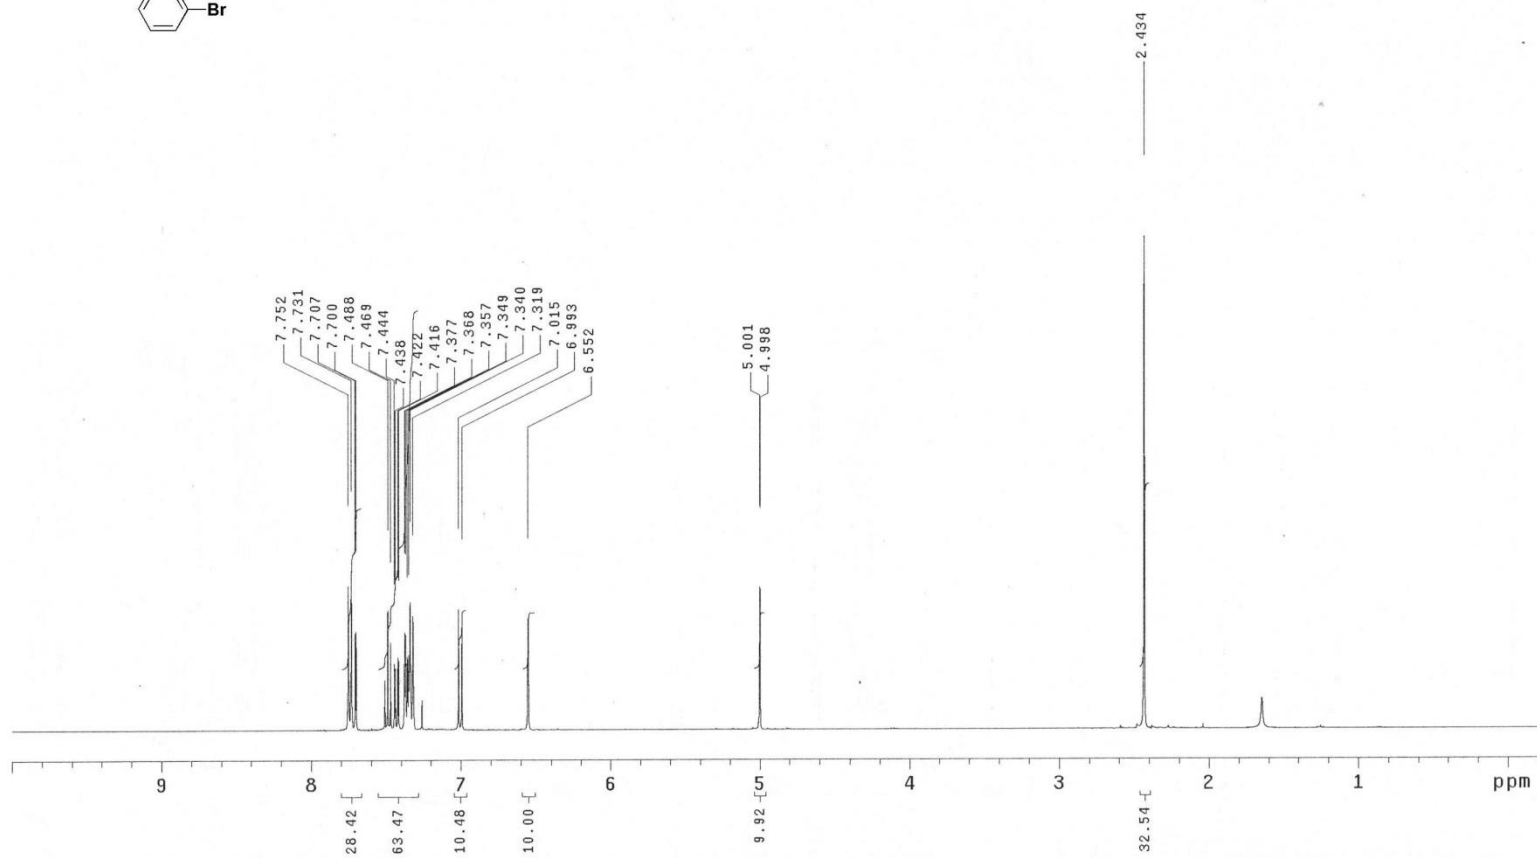



# Compound 2d (<sup>13</sup>C-NMR spectral data)

HAC150  
Pulse Sequence: s2pu1  
UNITYplus-400 "unity400"  
Date: Apr 18 2018  
Solvent: CDCl<sub>3</sub>  
Ambient temperature  
Total 752 repetitions

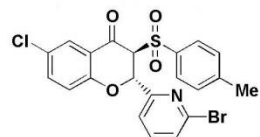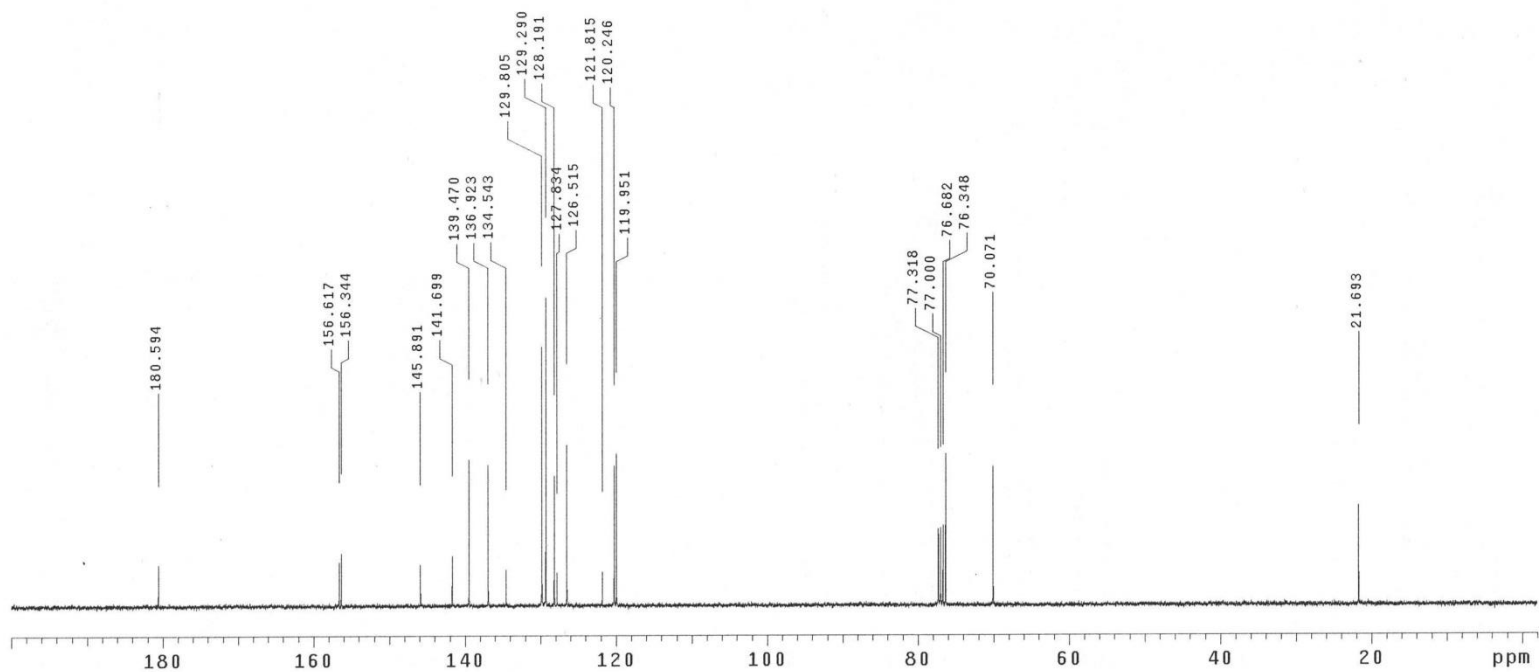

# Compound 2e (<sup>1</sup>H-NMR spectral data)

HA0Br44  
Pulse Sequence: s2pu1  
UNITYplus-400 "unity400"  
Date: Apr 16 2018  
Solvent: CDC13  
Ambient temperature  
Total 64 repetitions

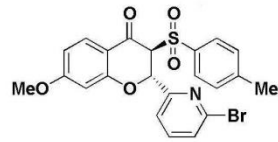

*trans* : *cis* > 10 : 1

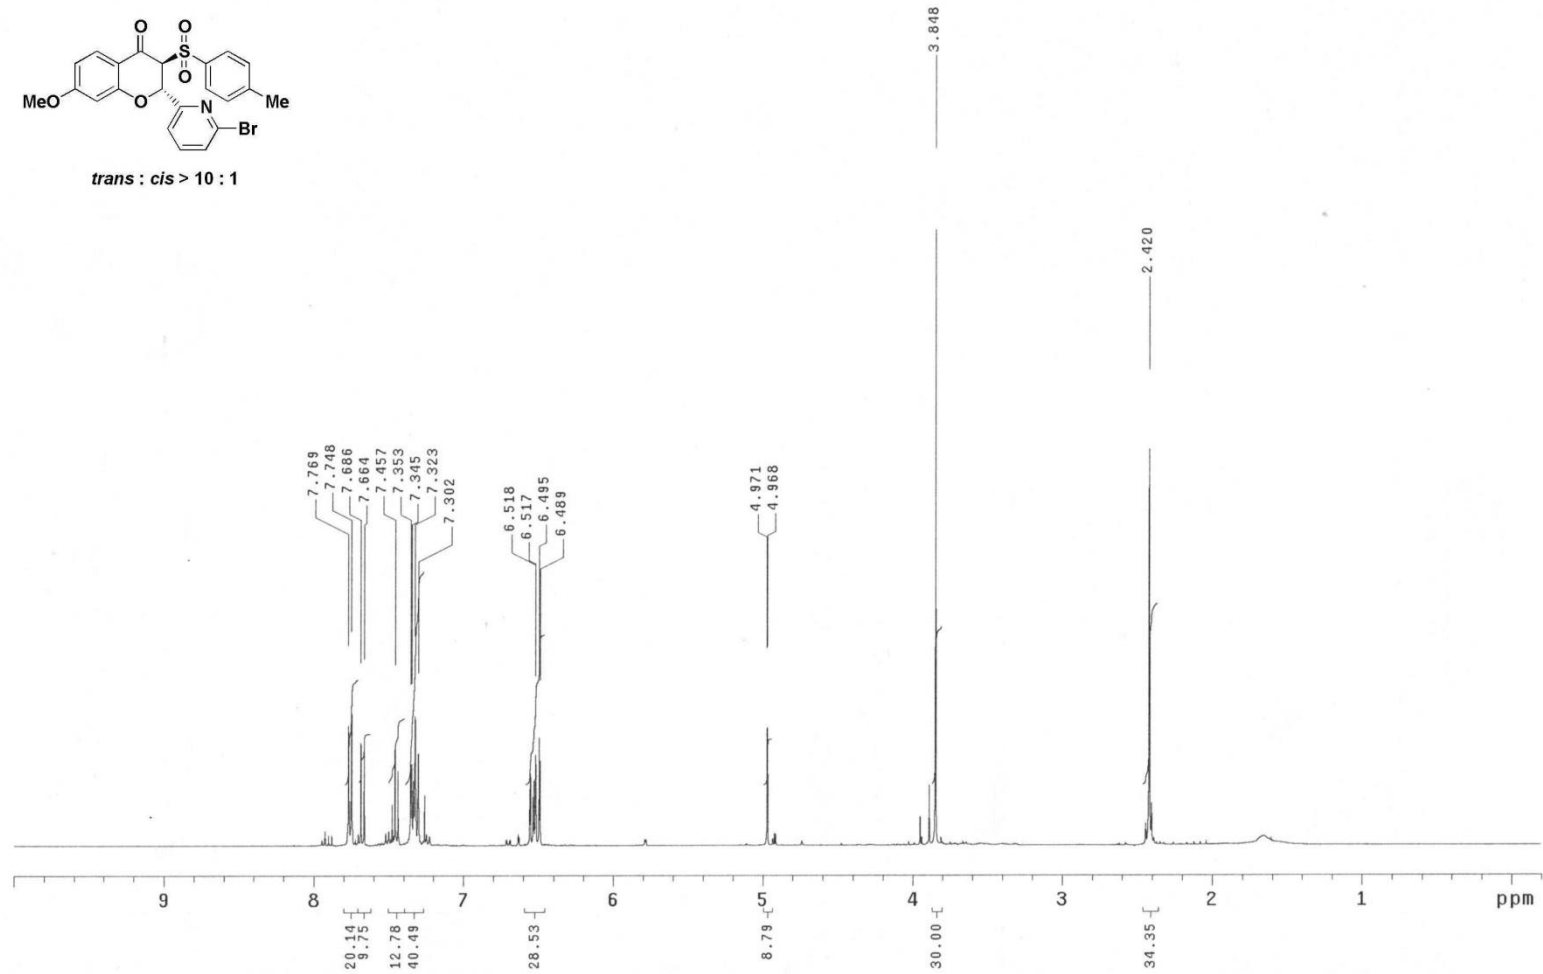

# Compound 2e (<sup>13</sup>C-NMR spectral data)

HA0Br44  
Pulse Sequence: s2pu1  
UNITYplus-400 "unity400"  
Date: Apr 16 2018  
Solvent: CDC13  
Ambient temperature  
Total 1200 repetitions

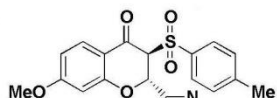

*trans* : *cis* > 10 : 1

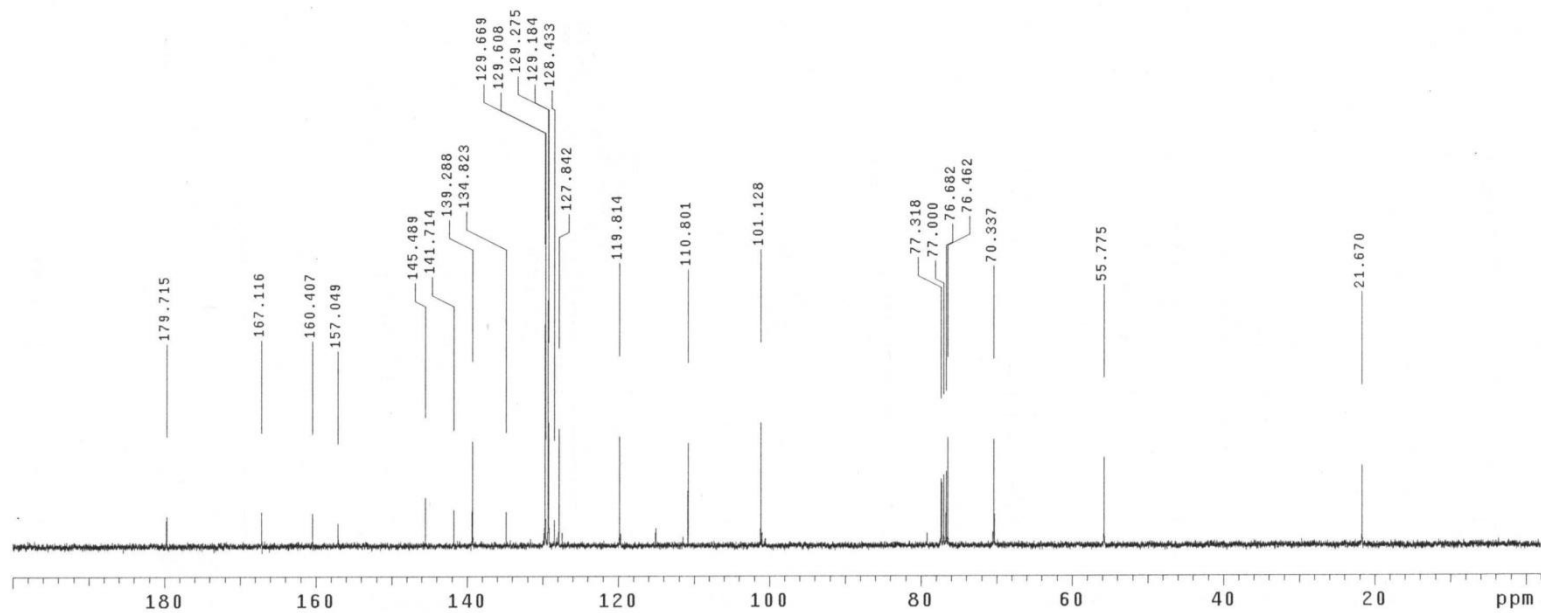

# Compound 2f (<sup>1</sup>H-NMR spectral data)

HA1070411  
Pulse Sequence: s2pu1  
UNITYplus-400 "unity400"  
Date: Apr 17 2018  
Solvent: CDCl3  
Ambient temperature  
Total 32 repetitions

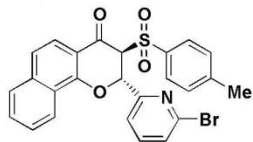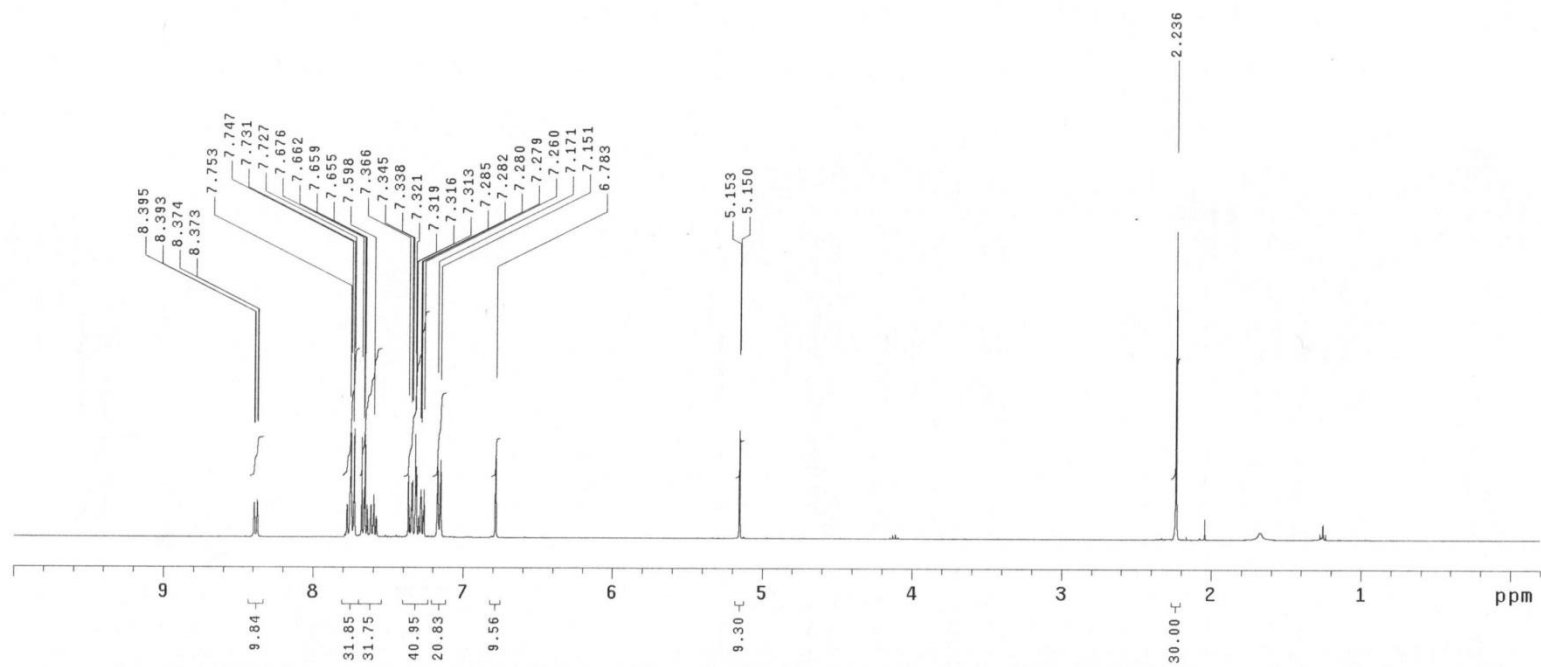

# Compound 2f (<sup>13</sup>C-NMR spectral data)

HA1070411

Pulse Sequence: s2pu1  
UNITYplus-400 "unity400"  
Date: Apr 17 2018  
Solvent: CDCl3  
Ambient temperature  
Total 1312 repetitions

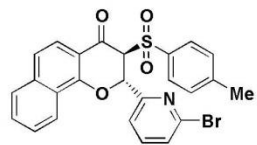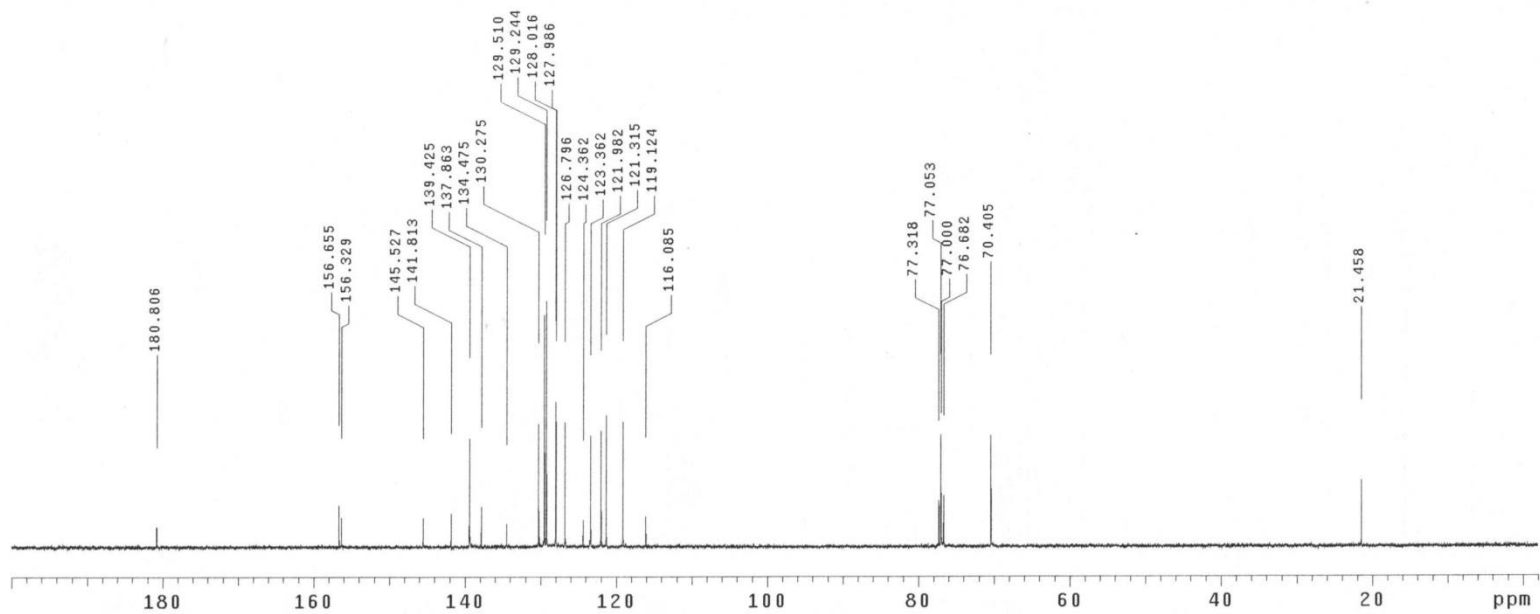

# Compound 2g (<sup>1</sup>H-NMR spectral data)

HA4BrNAPB

Pulse Sequence: s2pu1  
UNITYplus-400 "unity400"  
Date: Jan 31 2019  
Solvent: CDC13  
Ambient temperature  
Total 32 repetitions

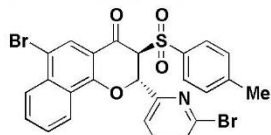

*trans* : *cis* > 8 : 1

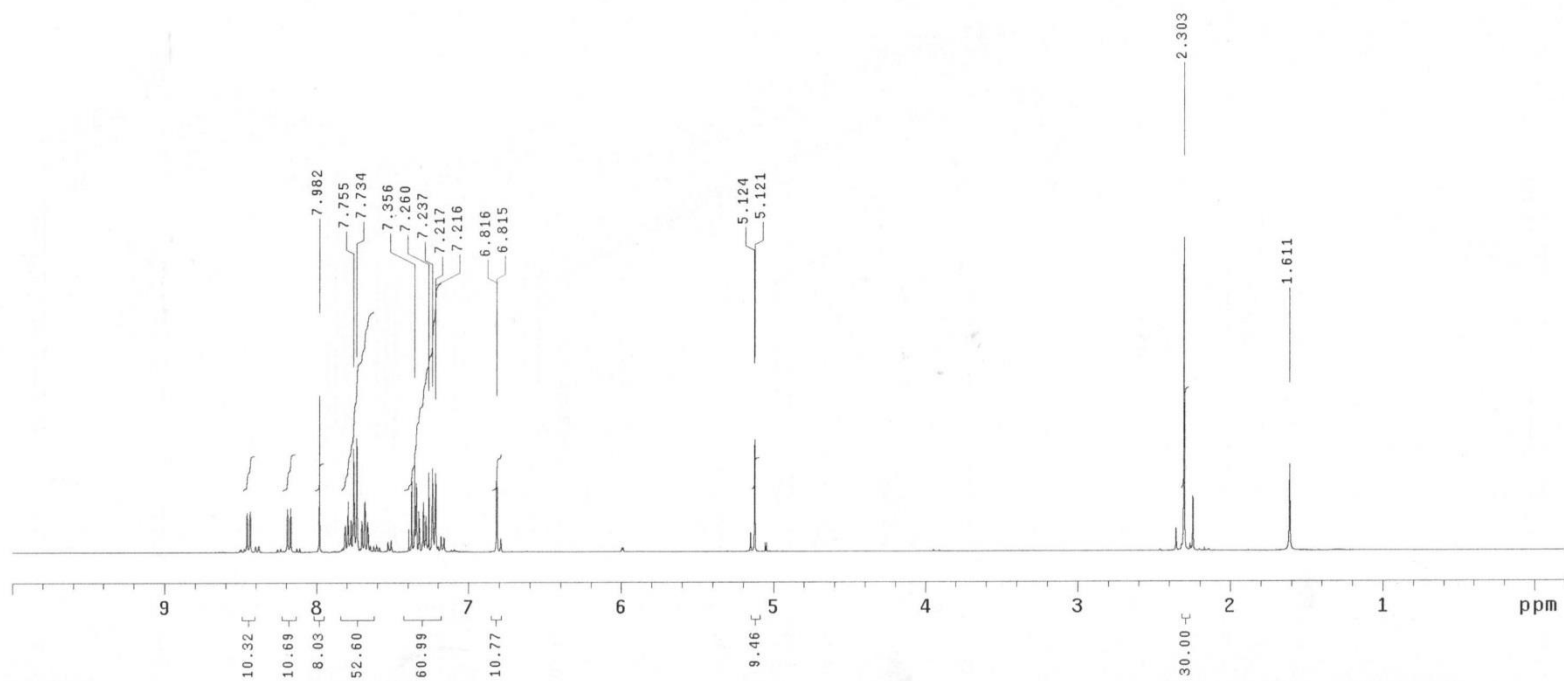

# Compound 2g (<sup>13</sup>C-NMR spectral data)

HA4BrNAPB

Pulse Sequence: s2pu1  
UNITYplus-400 "unity400"  
Date: Jan 31 2019  
Solvent: CDCl3  
Ambient temperature  
Total 1616 repetitions

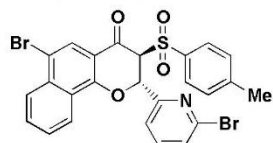

*trans* : *cis* > 8 : 1

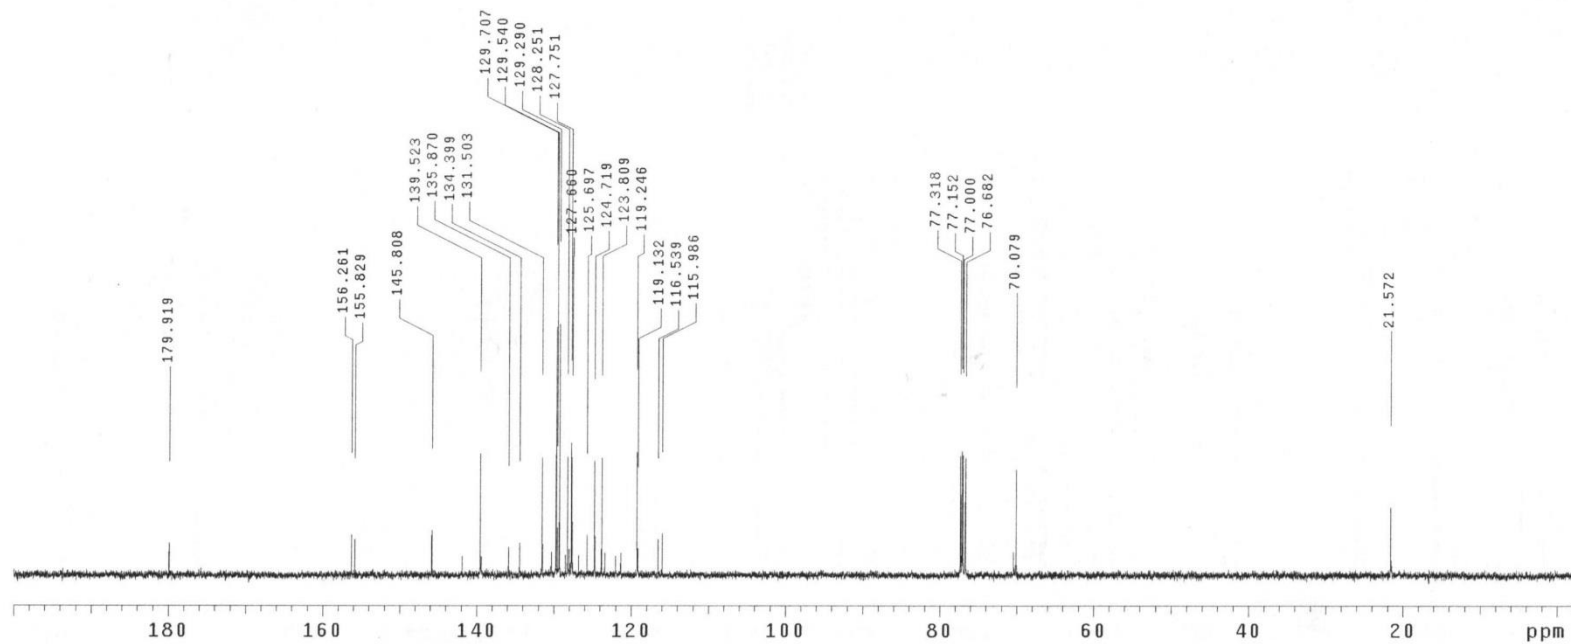

# Compound 2h (<sup>1</sup>H-NMR spectral data)

KT40MePB

Pulse Sequence: s2pu1  
UNITYplus-400 "unity400"  
Date: Aug 21 2019  
Solvent: CDCl3  
Ambient temperature  
Total 32 repetitions

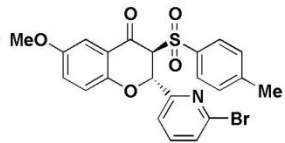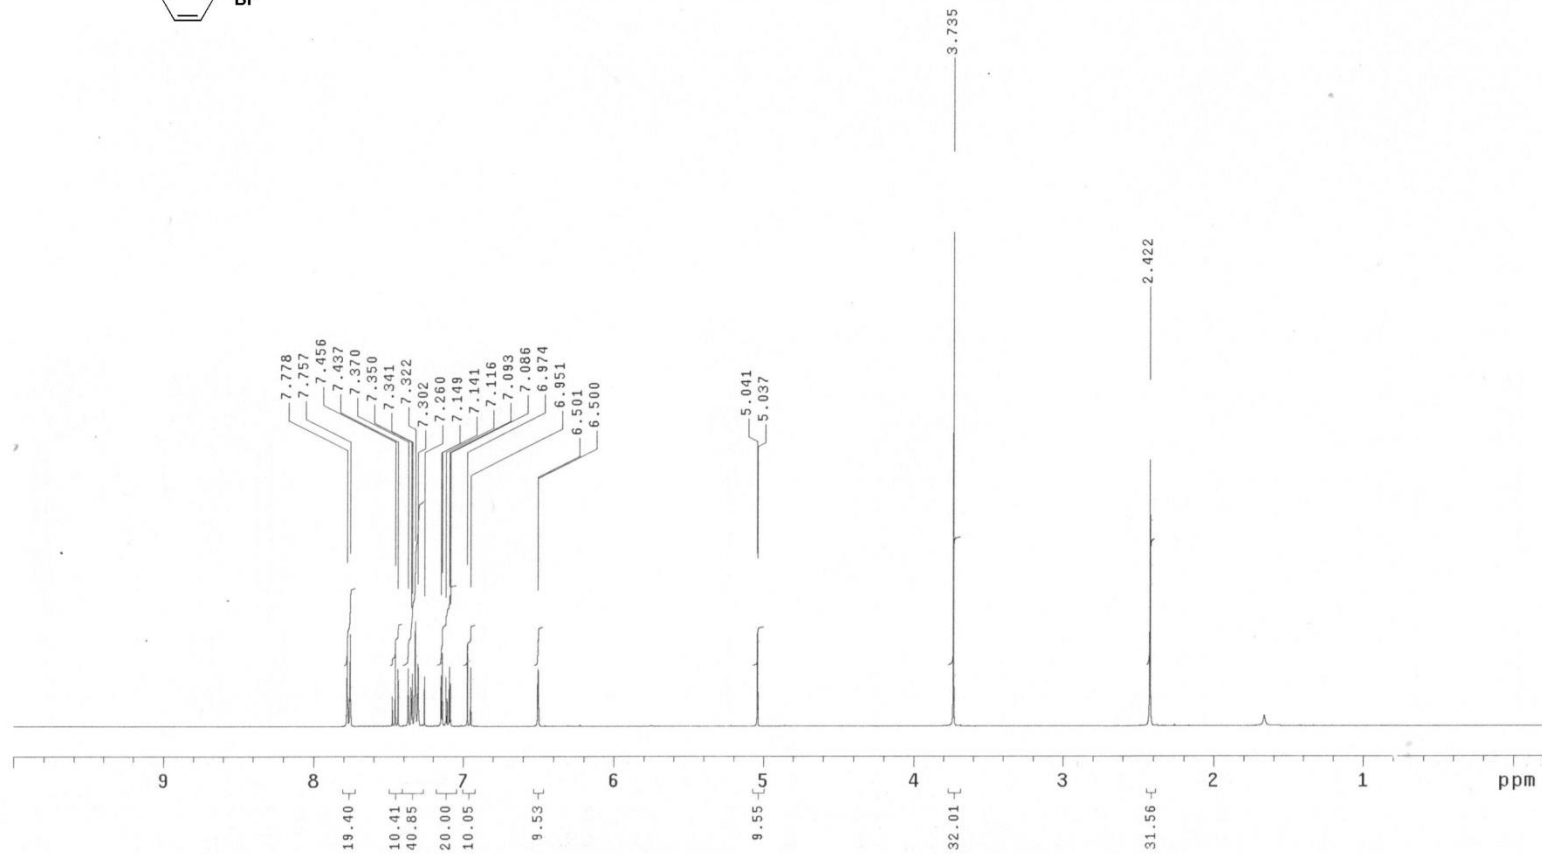



# Compound 2h (<sup>13</sup>C-NMR spectral data)

KT40MePB

Pulse Sequence: s2pu1  
UNITYplus-400 "unity400"  
Date: Aug 21 2019  
Solvent: CDCl<sub>3</sub>  
Ambient temperature  
Total 816 repetitions

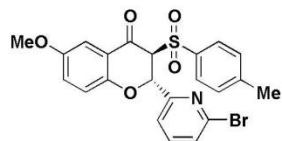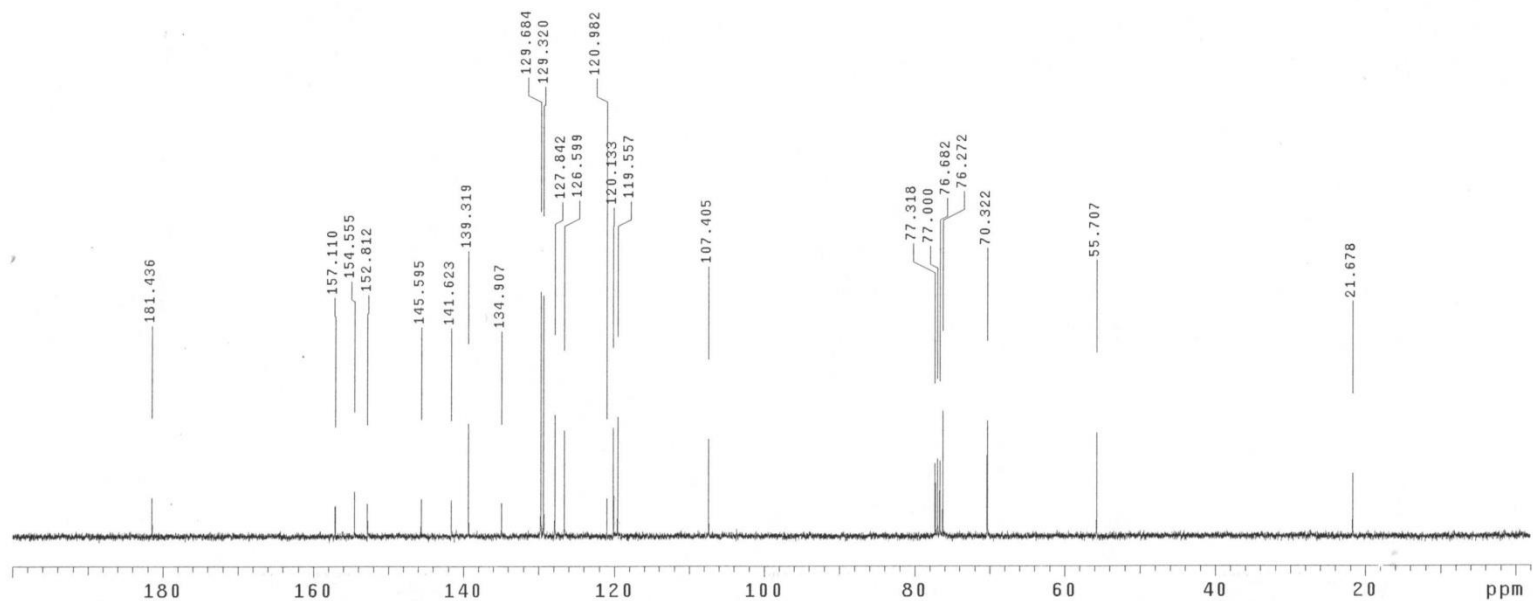

# Compound 2i (<sup>1</sup>H-NMR spectral data)

KT4MePB

Pulse Sequence: s2pu1  
UNITYplus-400 "unity400"  
Date: Sep 11 2019  
Solvent: CDCl3  
Ambient temperature  
Total 32 repetitions

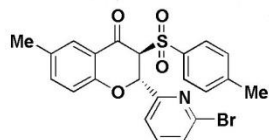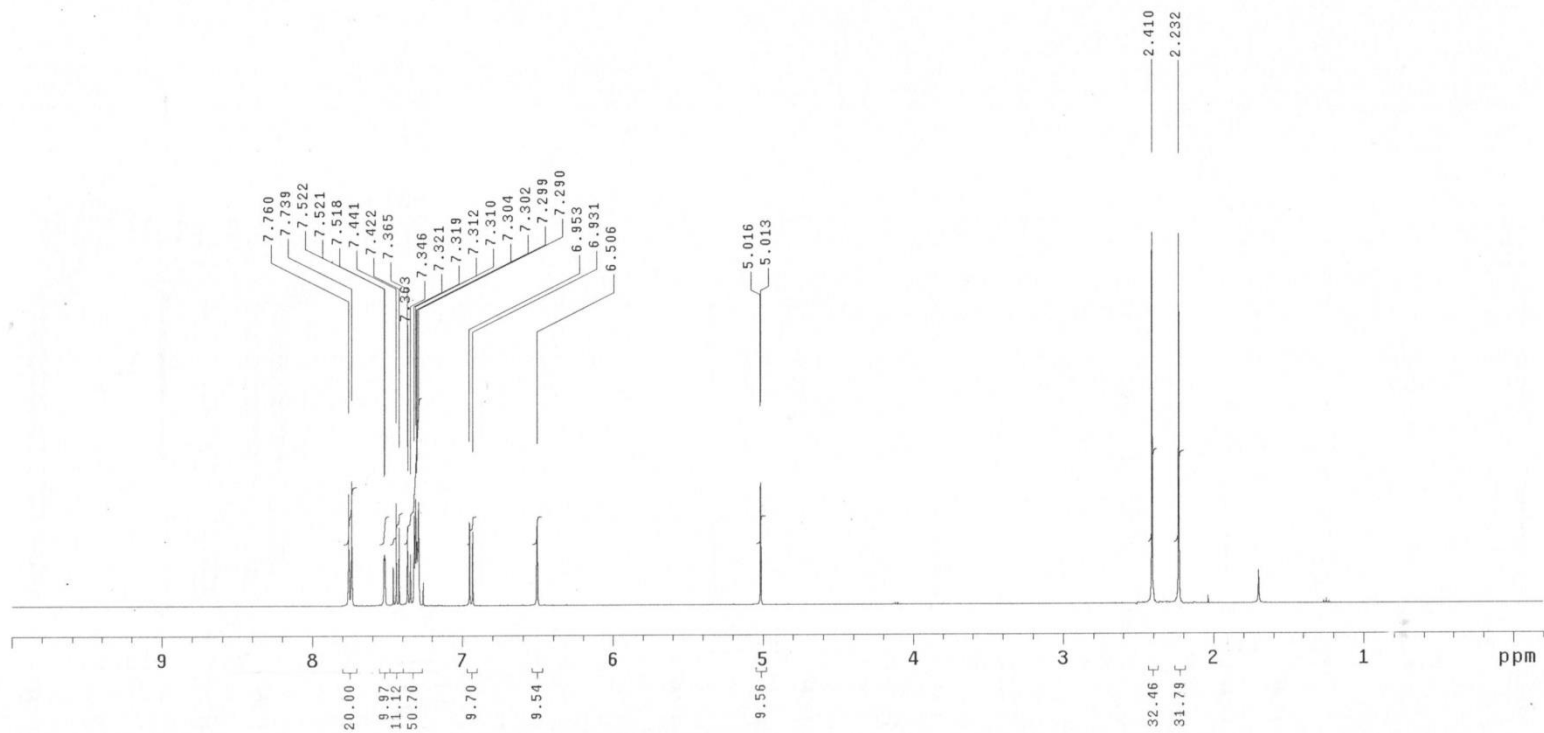

# Compound 2i (<sup>13</sup>C-NMR spectral data)

KT4MePB

Pulse Sequence: s2pu1  
UNITYplus-400 "unity400"  
Date: Sep 11 2019  
Solvent: CDCl<sub>3</sub>  
Ambient temperature  
Total 560 repetitions

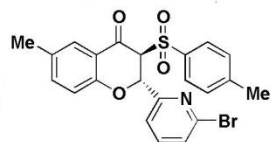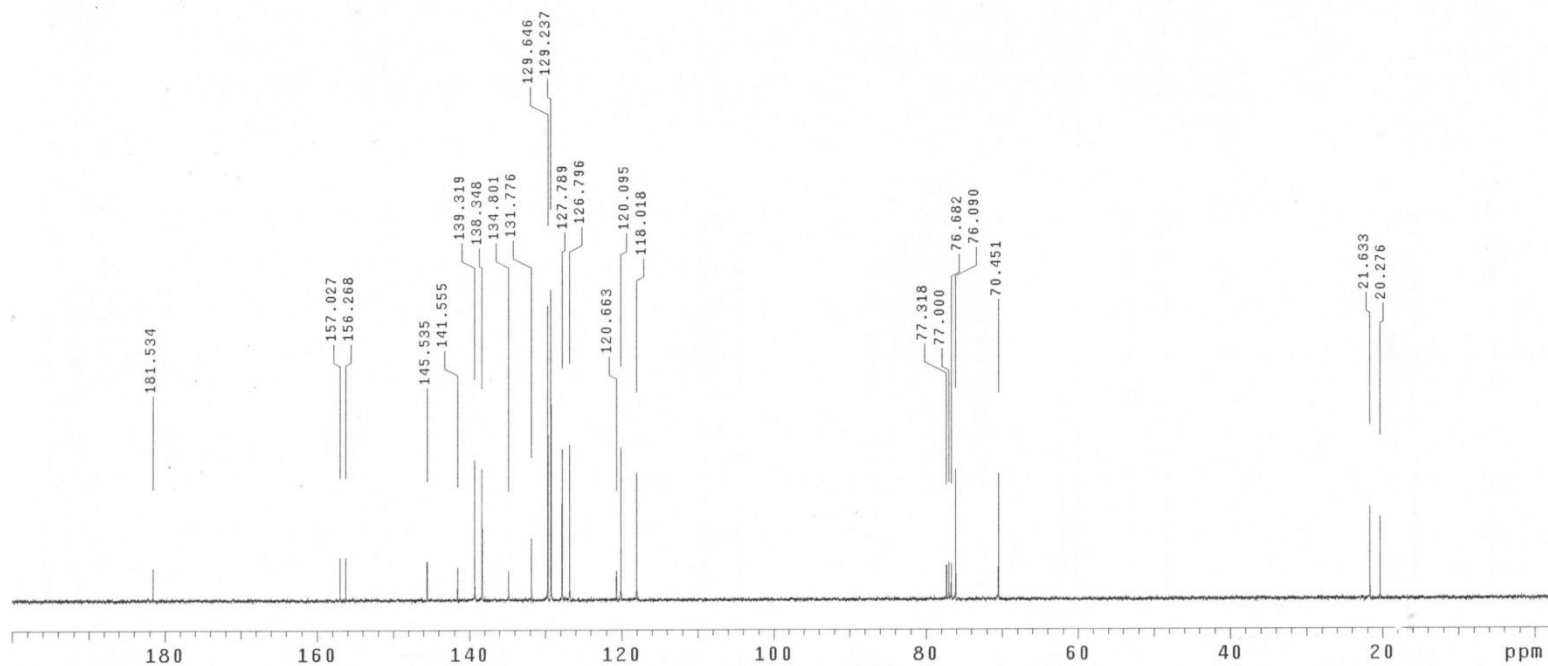

# Compound 2j (<sup>1</sup>H-NMR spectral data)

HATsPy

Pulse Sequence: s2pu1  
UNITYplus-400 "unity400"  
Date: May 2 2018  
Solvent: CDCl<sub>3</sub>  
Ambient temperature  
Total 64 repetitions

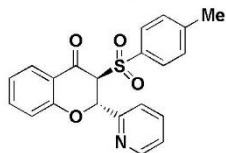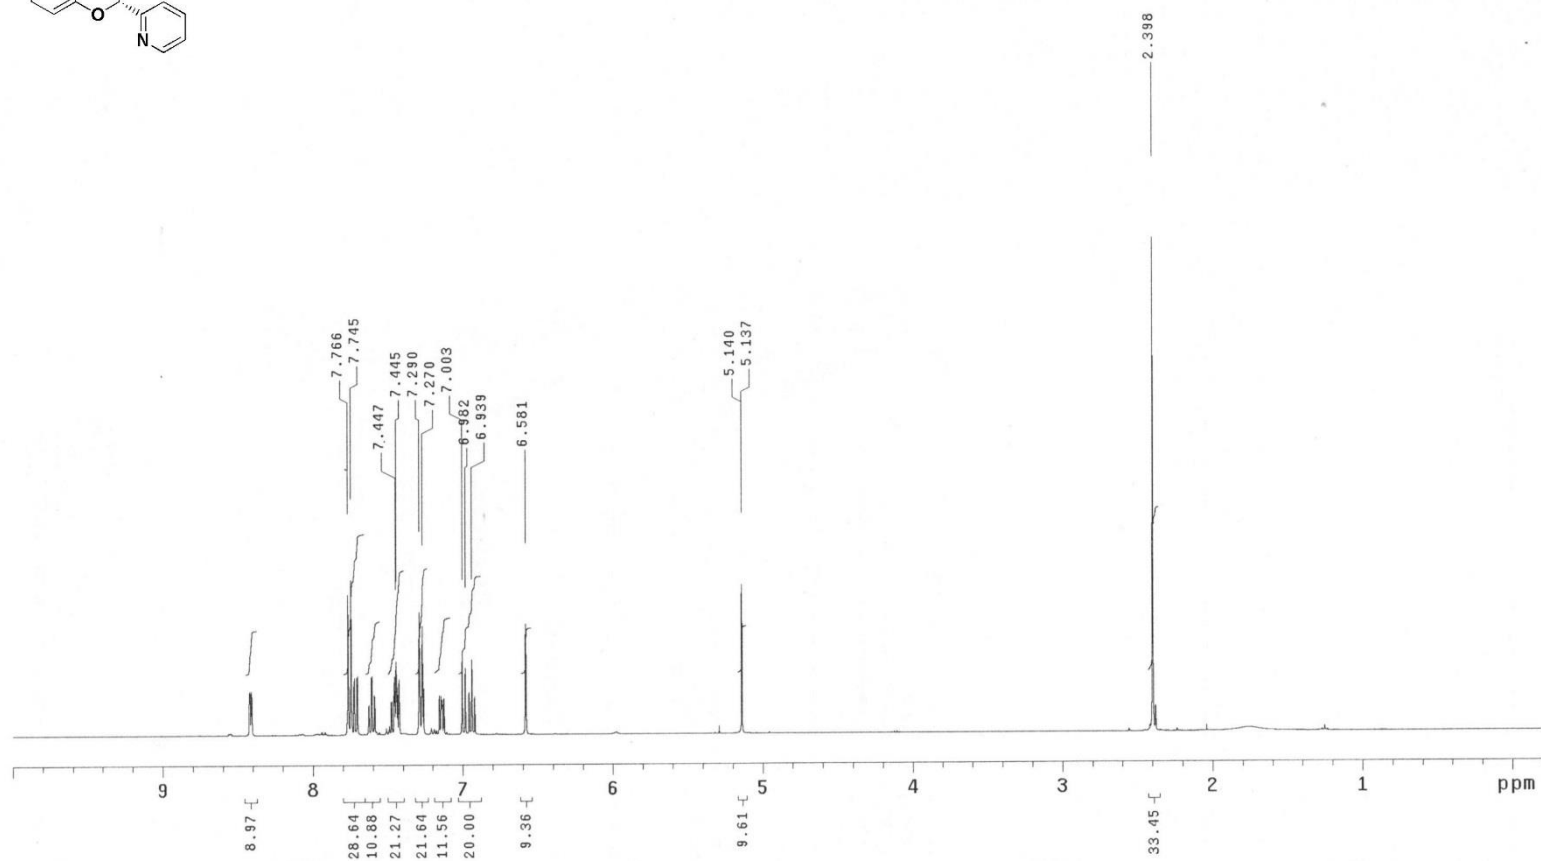

# Compound 2j (<sup>13</sup>C-NMR spectral data)

HATsPy

Pulse Sequence: s2pu1  
UNITYplus-400 "unity400"  
Date: May 2 2018  
Solvent: CDC13  
Ambient temperature  
Total 832 repetitions

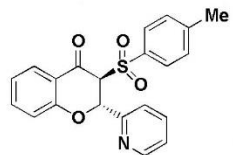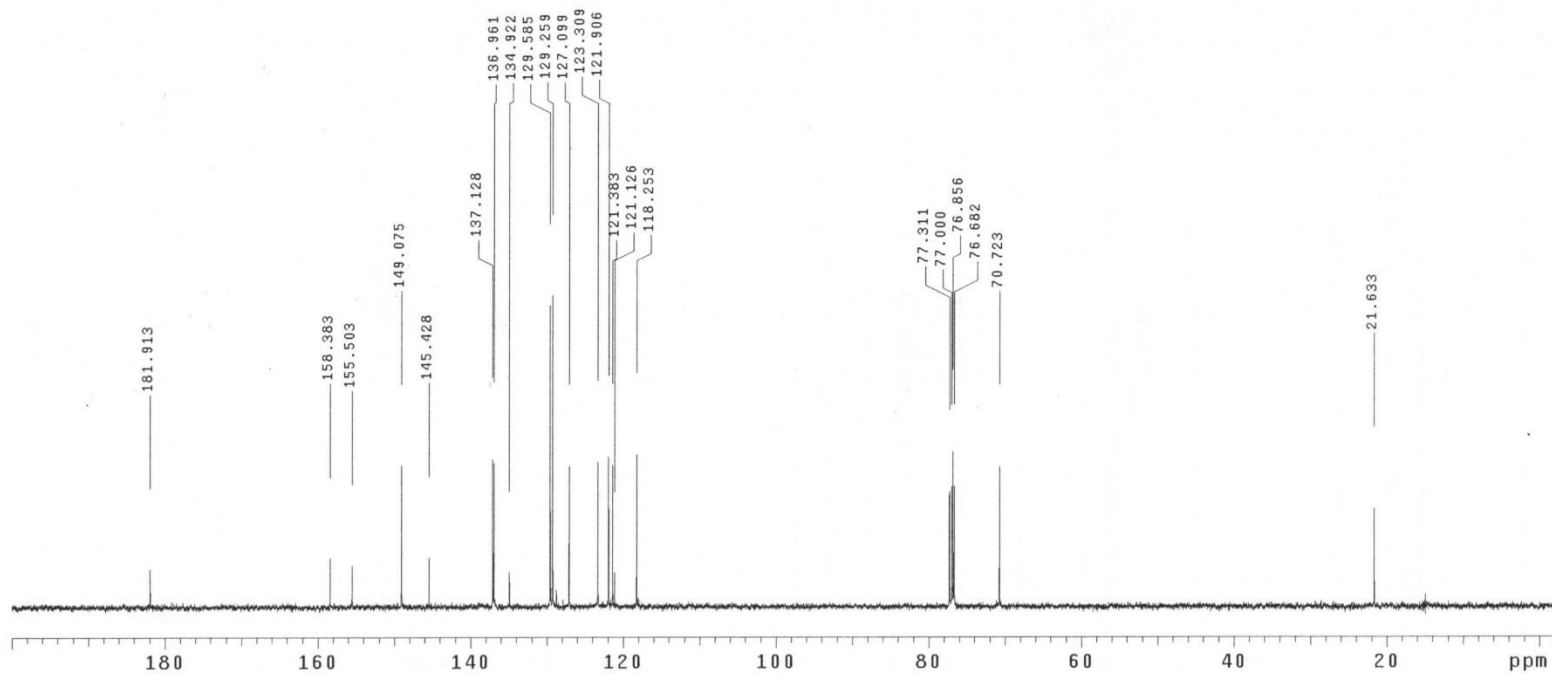

# Compound 2k (<sup>1</sup>H-NMR spectral data)

HAFTsP

Pulse Sequence: s2pu1  
UNITYplus-400 "unity400"  
Date: Feb 27 2019  
Solvent: CDCl<sub>3</sub>  
Ambient temperature  
Total 32 repetitions

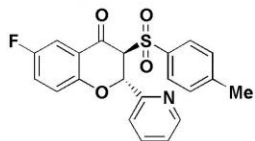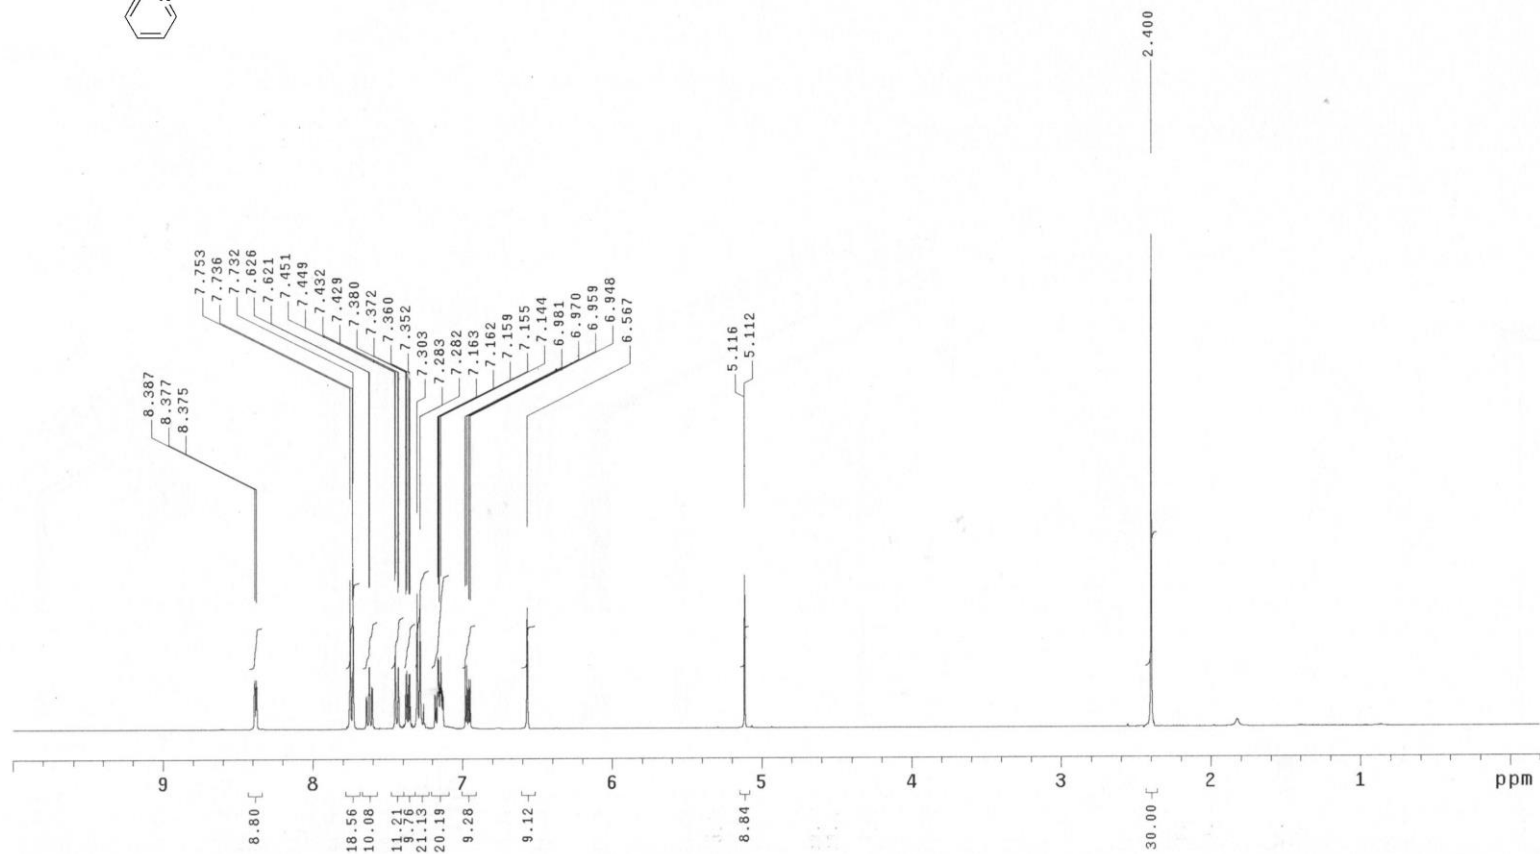

# Compound 2k (<sup>13</sup>C-NMR spectral data)

HAFTsP

Pulse Sequence: s2pu1  
UNITYplus-400 "unity400"  
Date: Feb 27 2019  
Solvent: CDCl3  
Ambient temperature  
Total 432 repetitions

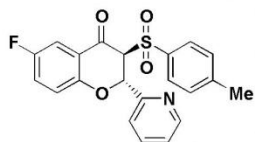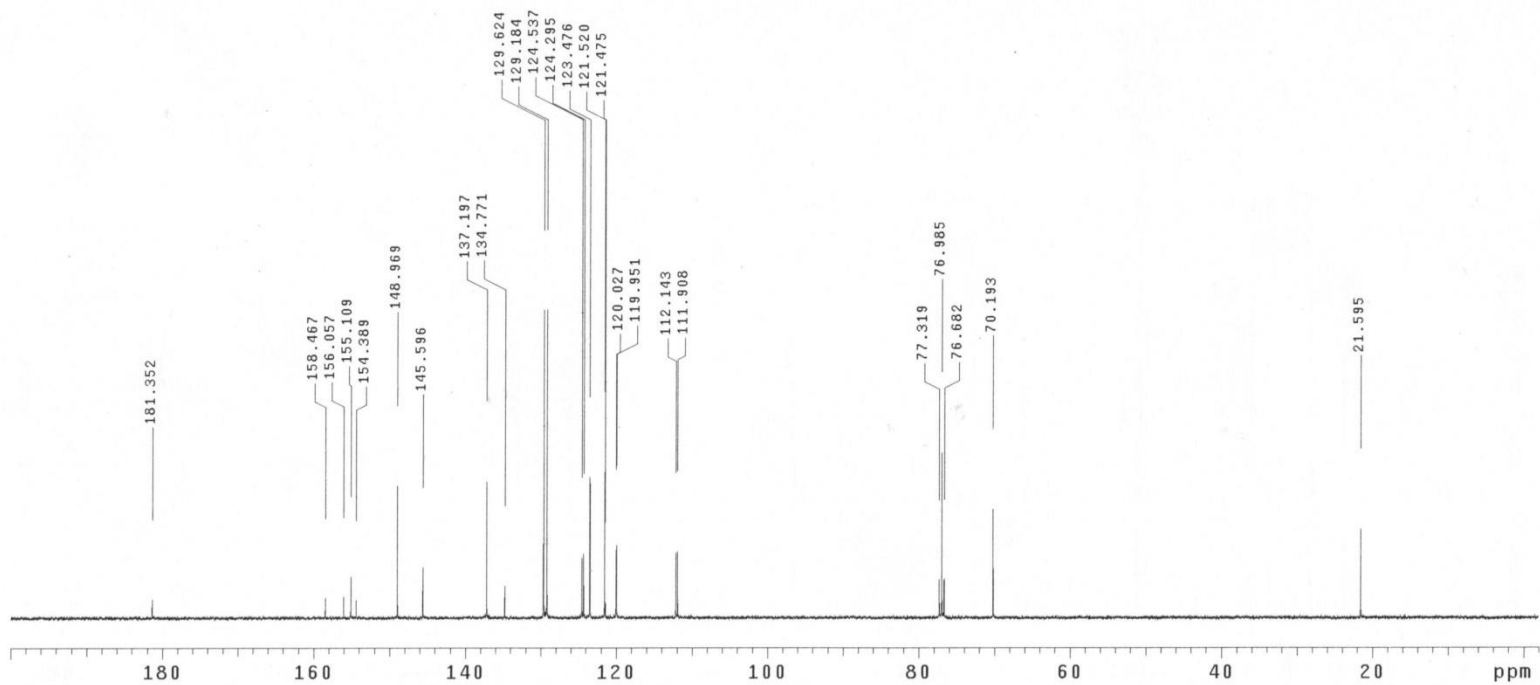

# Compound 2I (<sup>1</sup>H-NMR spectral data)

KTBrPY

Pulse Sequence: s2pu1  
UNITYplus-400 "unity400"  
Date: Jun 10 2019  
Solvent: CDCl<sub>3</sub>  
Ambient temperature  
Total 32 repetitions

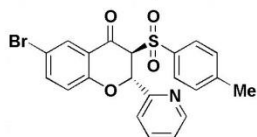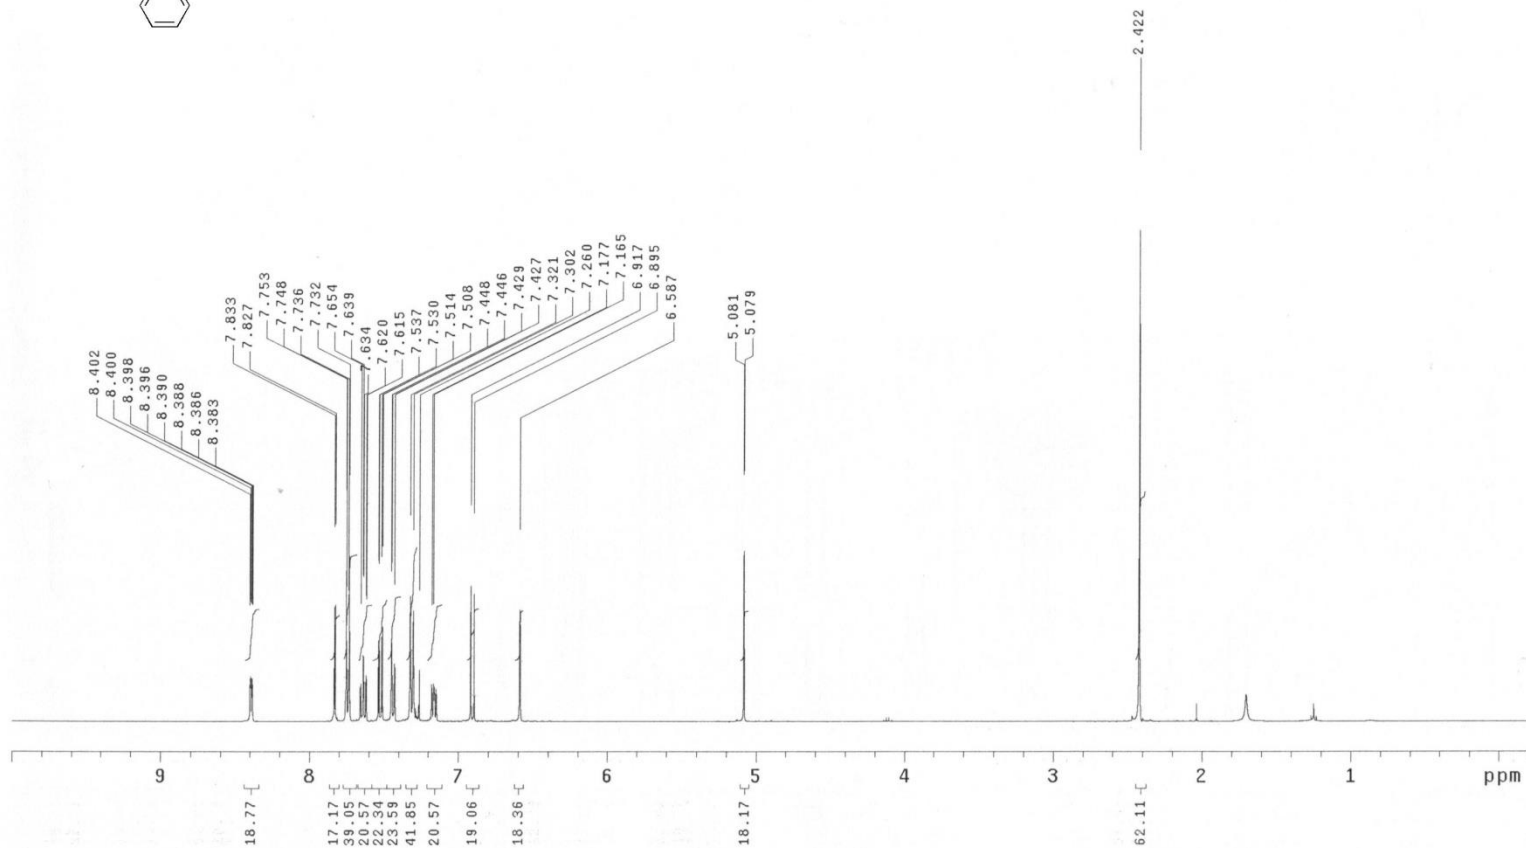



# Compound 2l (<sup>13</sup>C-NMR spectral data)

KTBrPY

Pulse Sequence: s2pul  
UNITYplus-400 "unity400"  
Date: Jun 10 2019  
Solvent: CDCl<sub>3</sub>  
Ambient temperature  
Total 832 repetitions

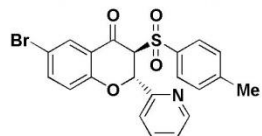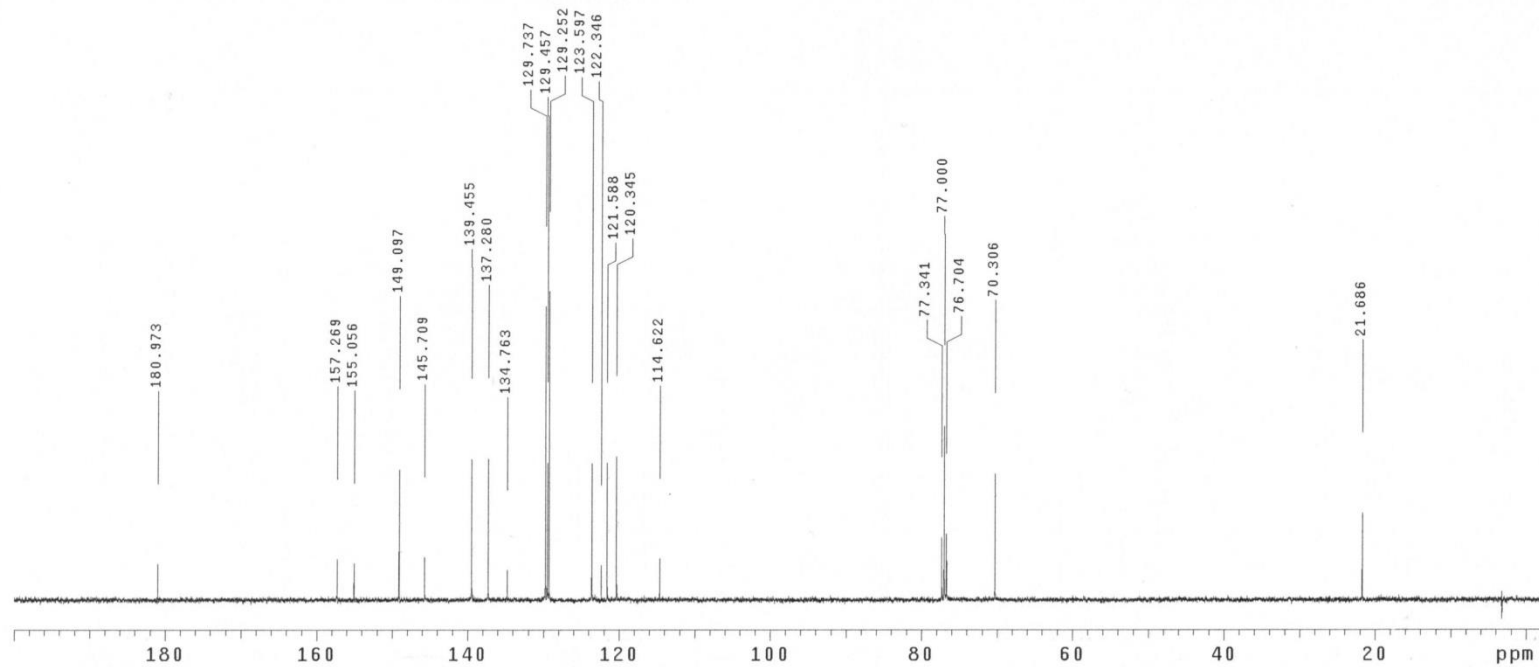

# Compound 2m (<sup>1</sup>H-NMR spectral data)

KT4C1PY

Pulse Sequence: s2pu1  
UNITYplus-400 "unity400"  
Date: Jun 11 2019  
Solvent: CDCl<sub>3</sub>  
Ambient temperature  
Total 32 repetitions

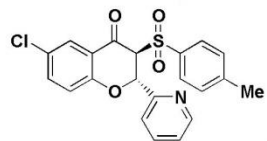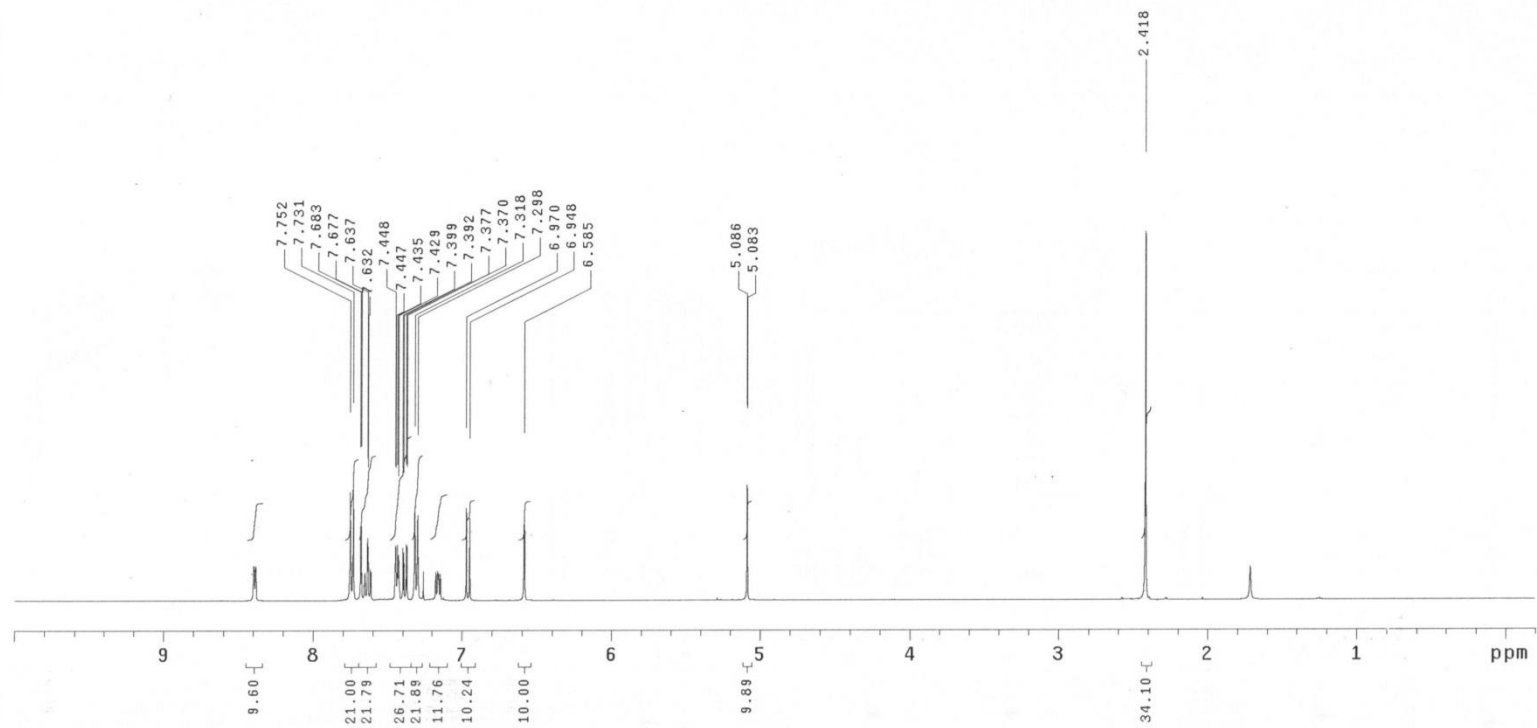

# Compound 2m (<sup>13</sup>C-NMR spectral data)

KT4C1PY

Pulse Sequence: s2pu1  
UNITYplus-400 "unity400"  
Date: Jun 11 2019  
Solvent: CDCl3  
Ambient temperature  
Total 1008 repetitions

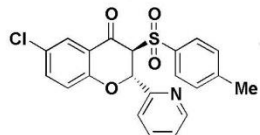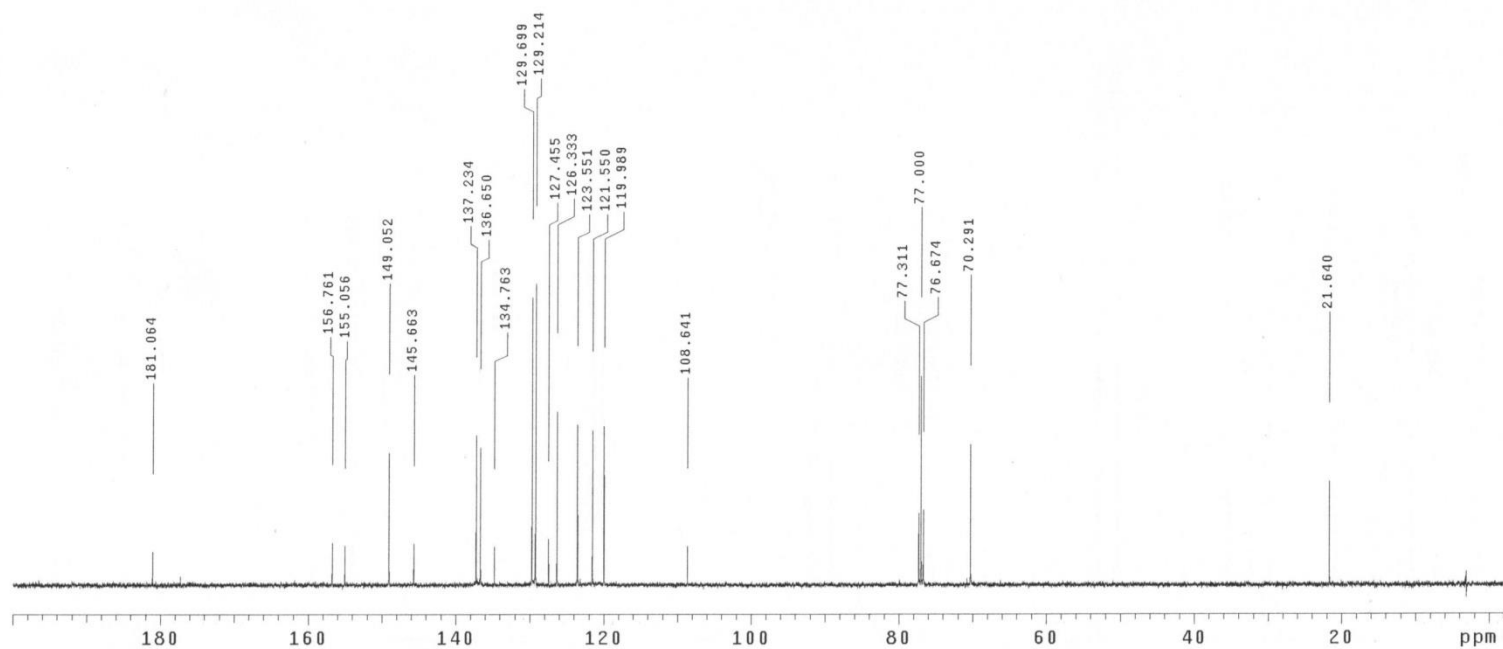

# Compound 2n (<sup>1</sup>H-NMR spectral data)

HA0MePY

Pulse Sequence: s2pu1

UNITYplus-400 "unity400"

Date: Mar 13 2019

Solvent: CDC13

Ambient temperature

Total 32 repetitions

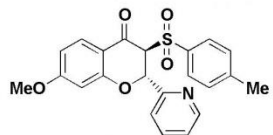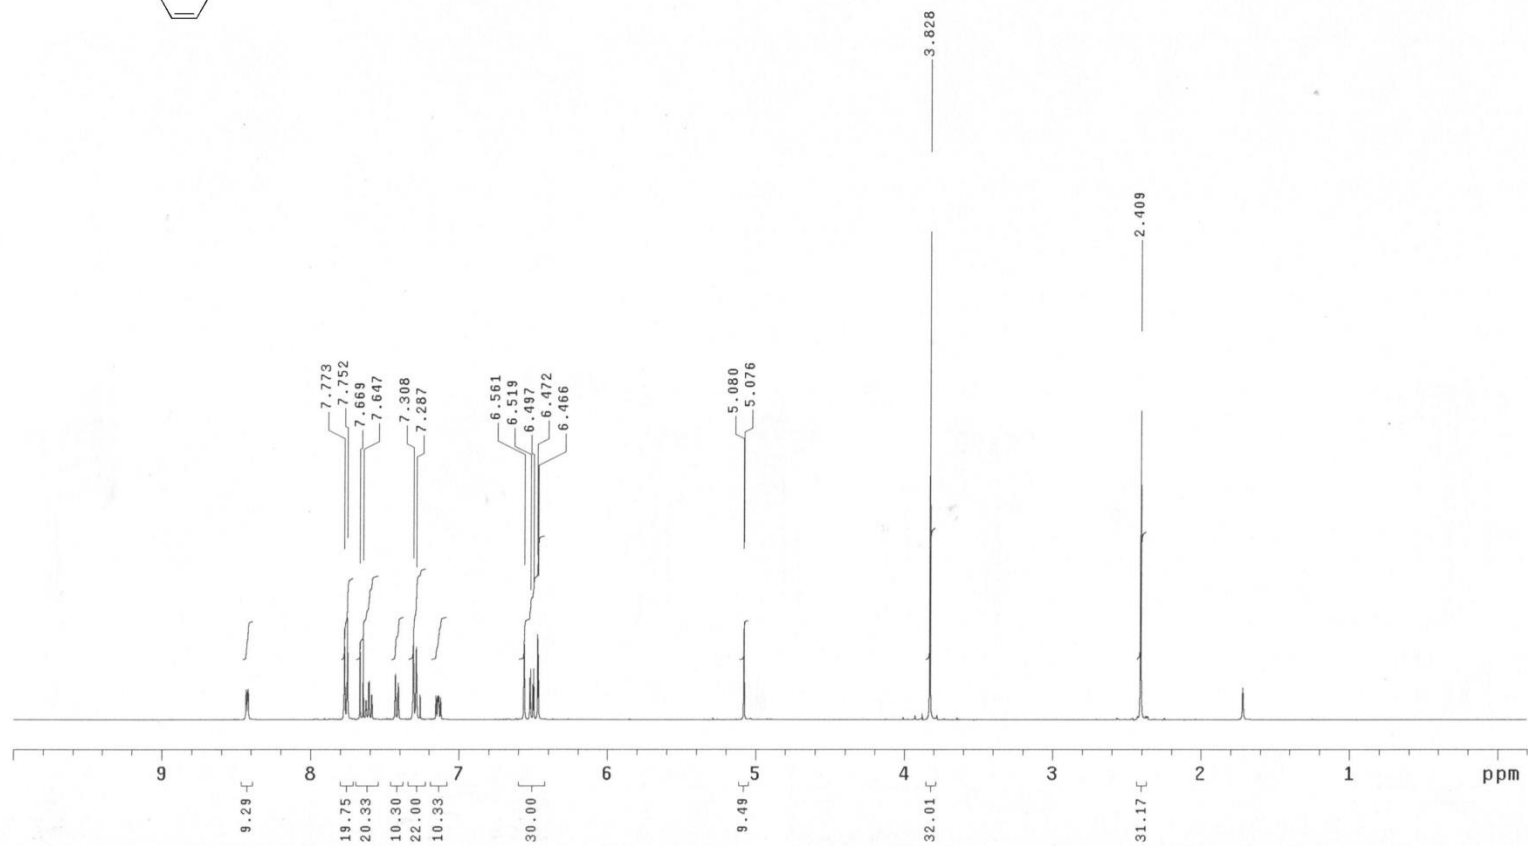

# Compound 2n (<sup>13</sup>C-NMR spectral data)

HA0MePY

Pulse Sequence: s2pu1  
UNITYplus-400 "unity400"  
Date: Mar 13 2019  
Solvent: CDCl3  
Ambient temperature  
Total 1408 repetitions

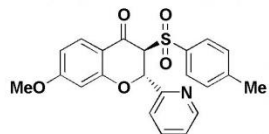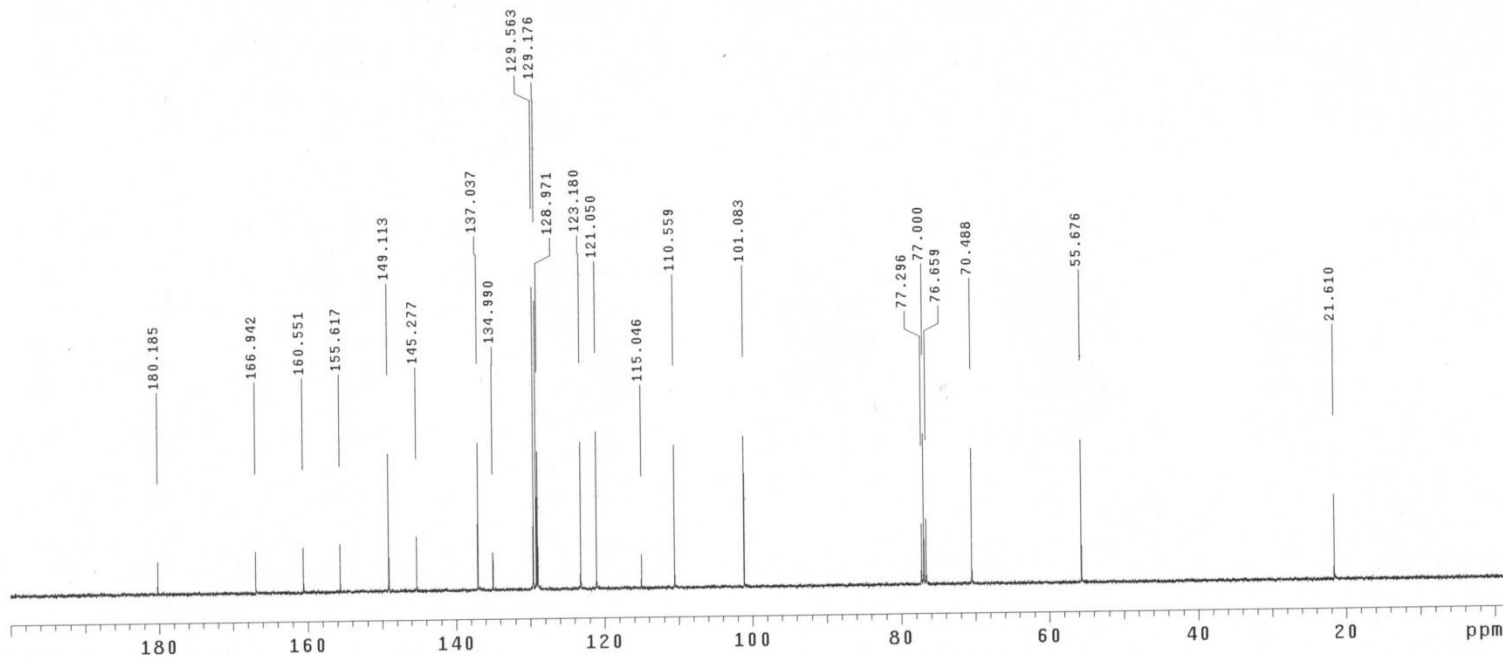

# Compound 2o (<sup>1</sup>H-NMR spectral data)

KT1NAPY

Pulse Sequence: s2pu1  
UNITYplus-400 "unity400"  
Date: Aug 5 2019  
Solvent: CDCl<sub>3</sub>  
Ambient temperature  
Total 32 repetitions

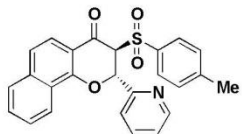

*trans* : *cis* > 10 : 1

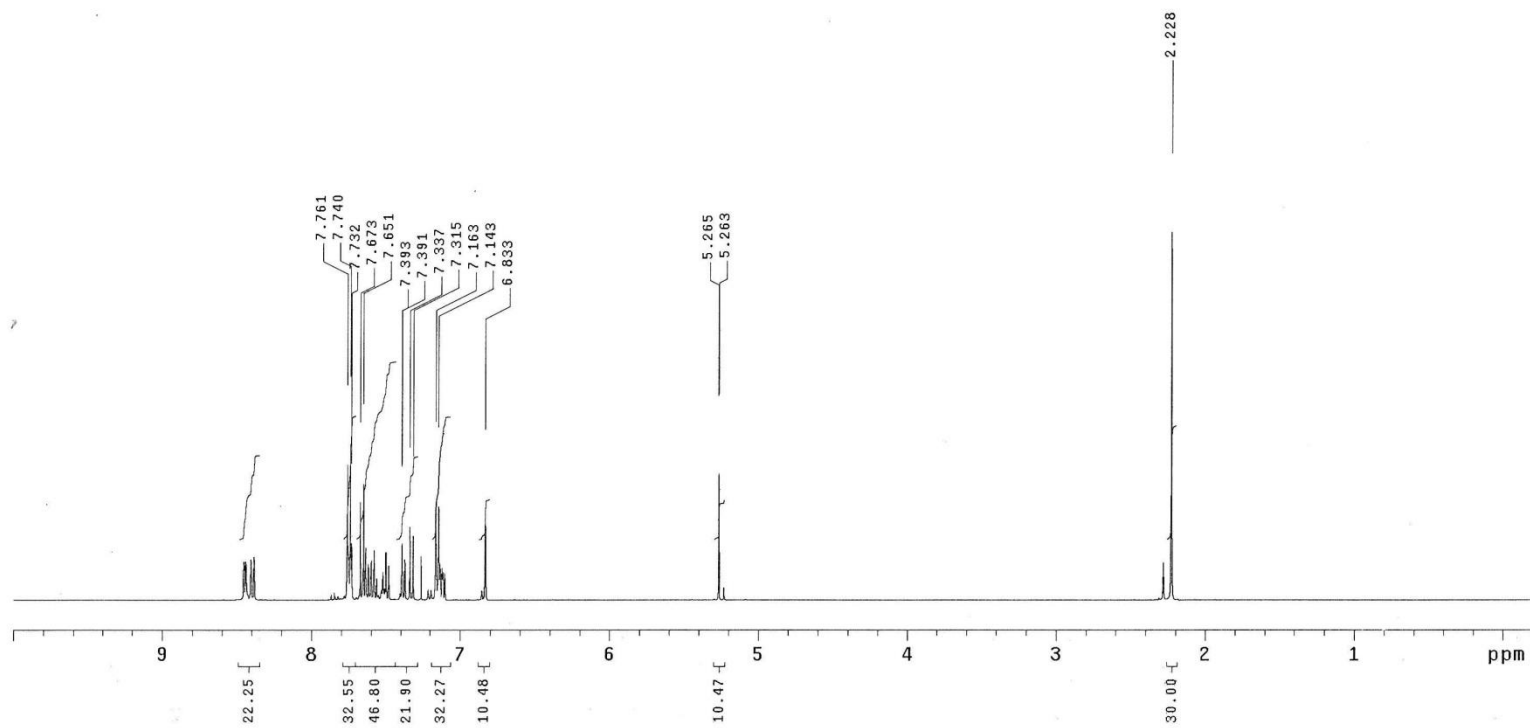

# Compound 2o (<sup>13</sup>C-NMR spectral data)

KT1NAPY

Pulse Sequence: s2pu1  
UNITYplus-400 "unity400"  
Date: Aug 5 2019  
Solvent: CDCl<sub>3</sub>  
Ambient temperature  
Total 1296 repetitions

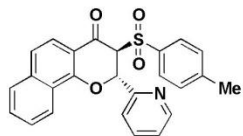

trans : cis > 10 : 1

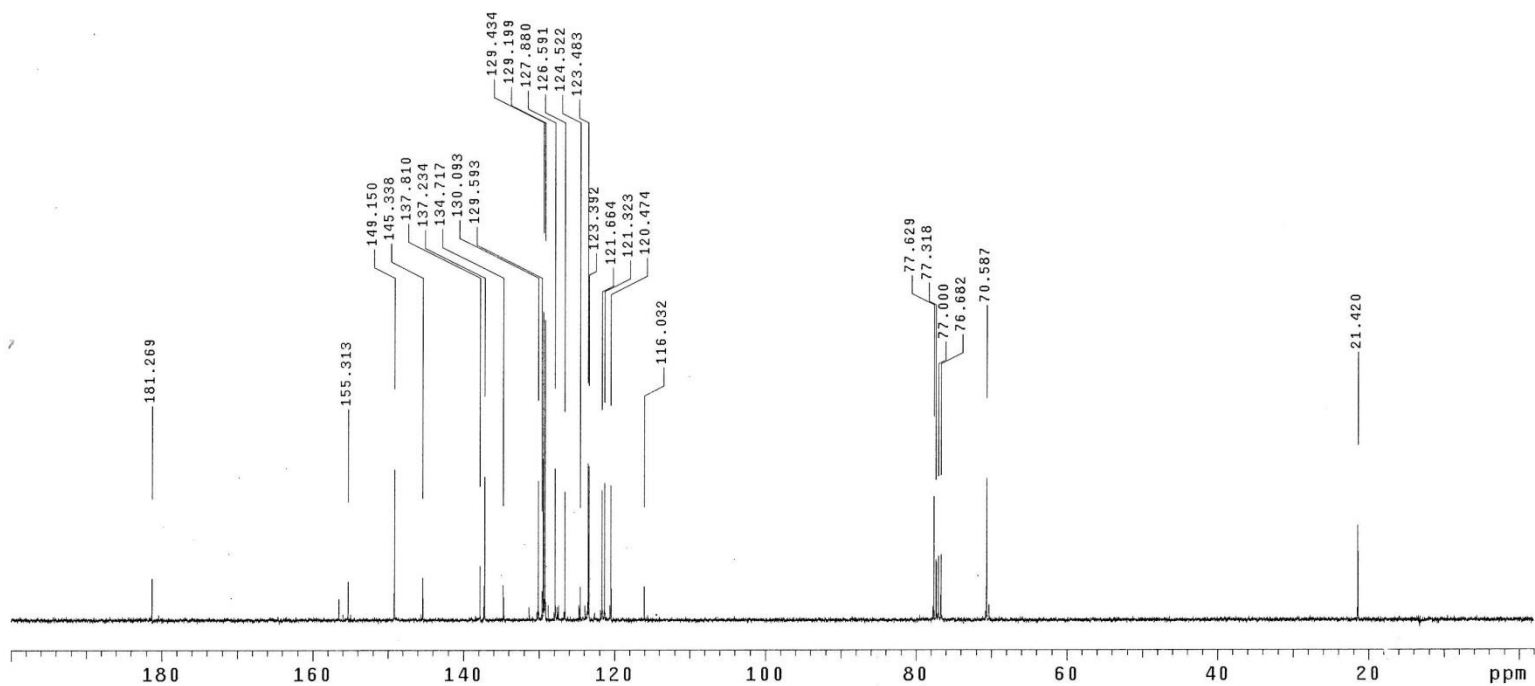

# Compound 2p (<sup>1</sup>H-NMR spectral data)

KT40MePy

Pulse Sequence: s2pu1  
UNITYplus-400 "unity400"  
Date: Sep 4 2019  
Solvent: CDCl3  
Ambient temperature  
Total 32 repetitions

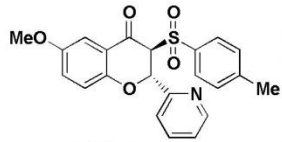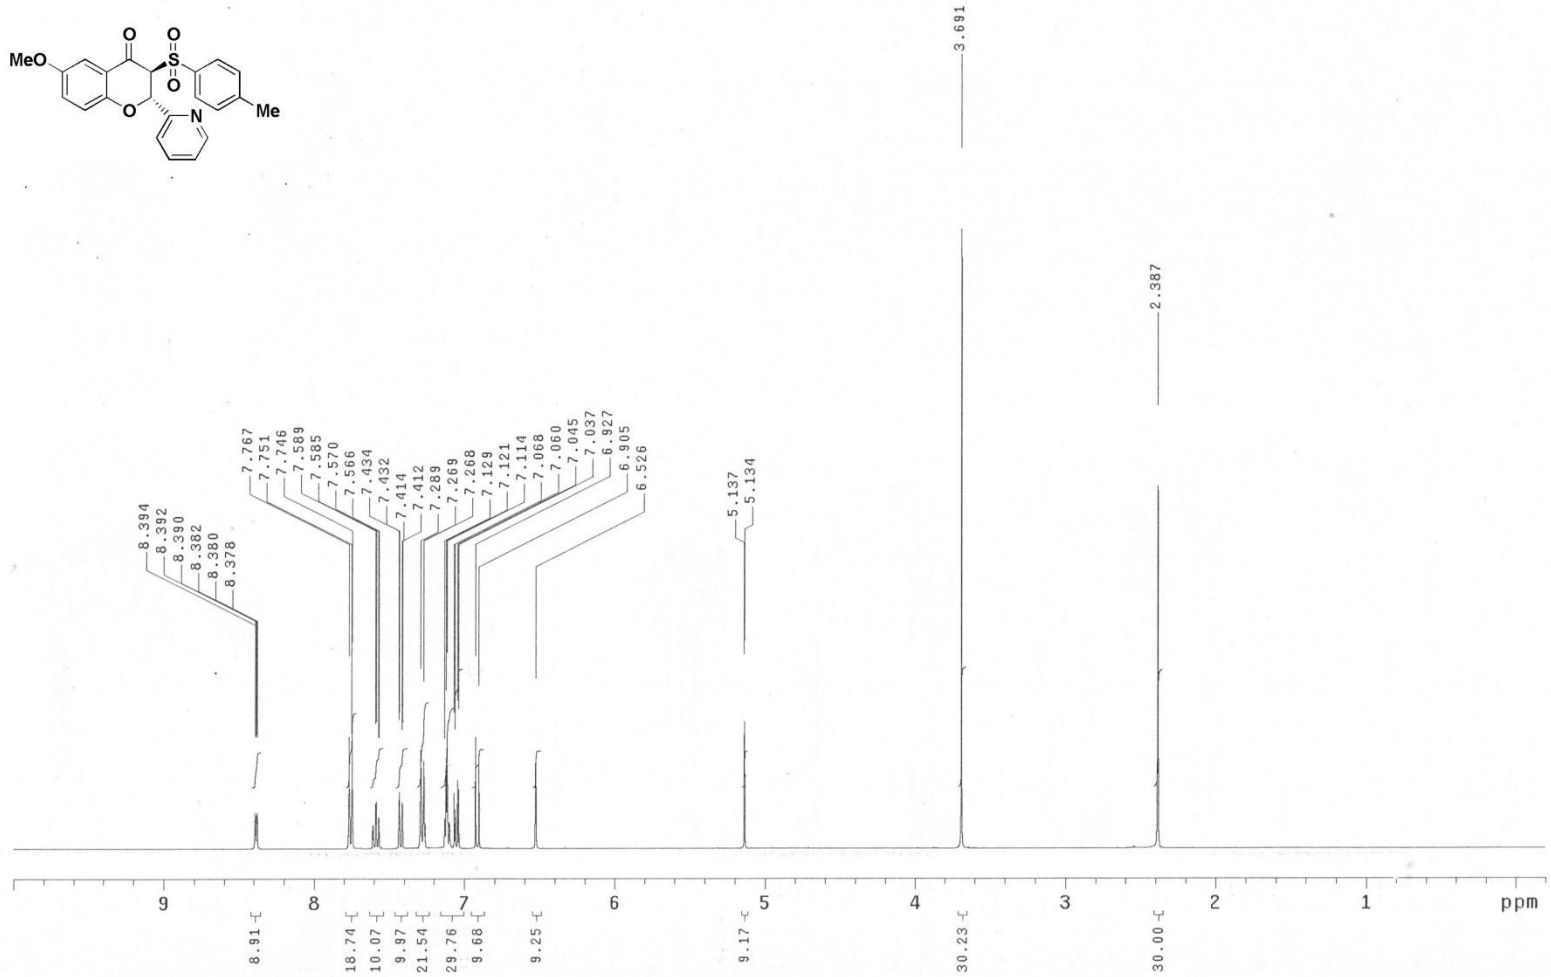



# Compound 2p (<sup>13</sup>C-NMR spectral data)

KT40MePy

Pulse Sequence: s2pu1  
UNITYplus-400 "unity400"  
Date: Sep 4 2019  
Solvent: CDCl<sub>3</sub>  
Ambient temperature  
Total 2752 repetitions

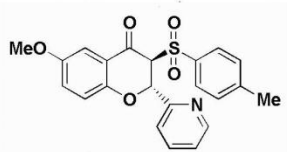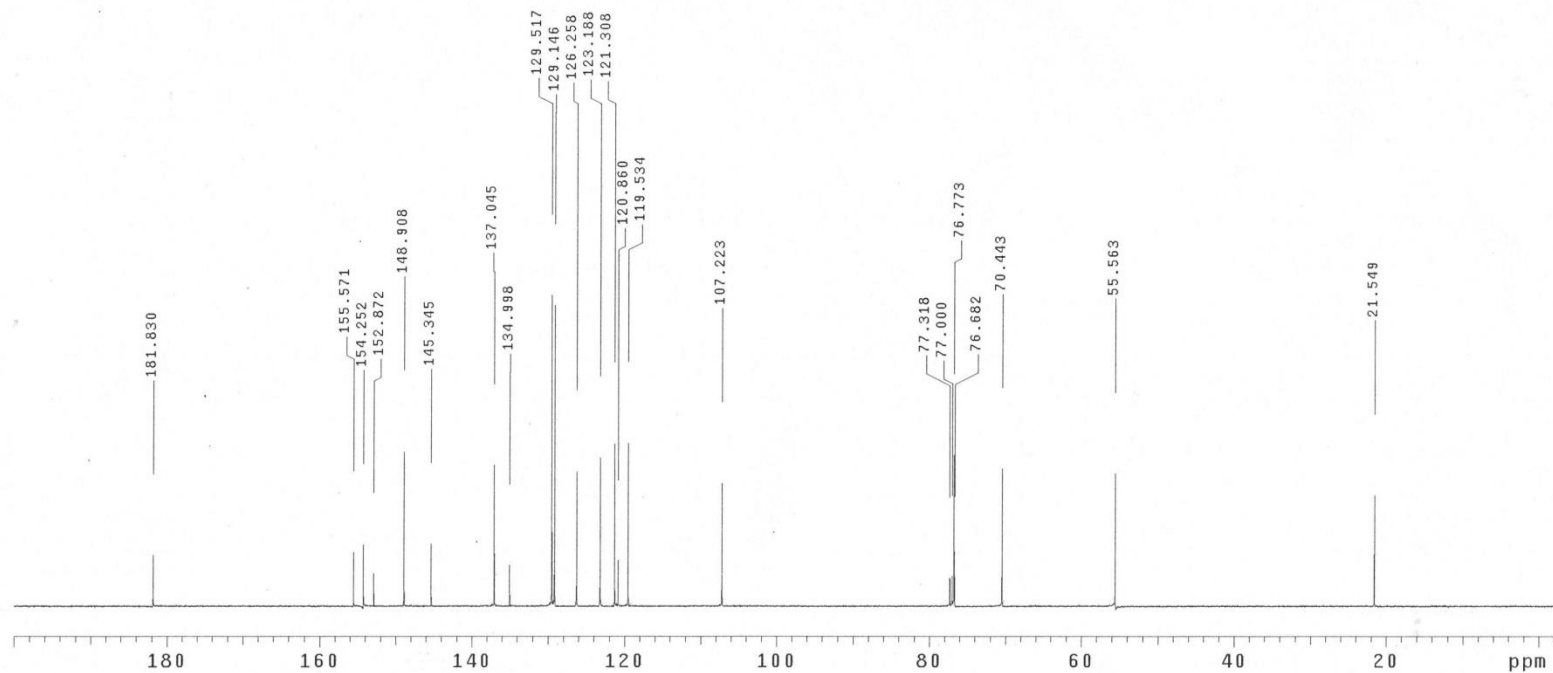

# Compound 2q (<sup>1</sup>H-NMR spectral data)

KT4MePY

Pulse Sequence: s2pul  
UNITYplus-400 "unity400"  
Date: Jun 14 2019  
Solvent: CDCl<sub>3</sub>  
Ambient temperature  
Total 32 repetitions

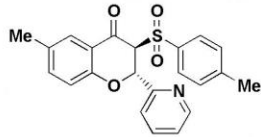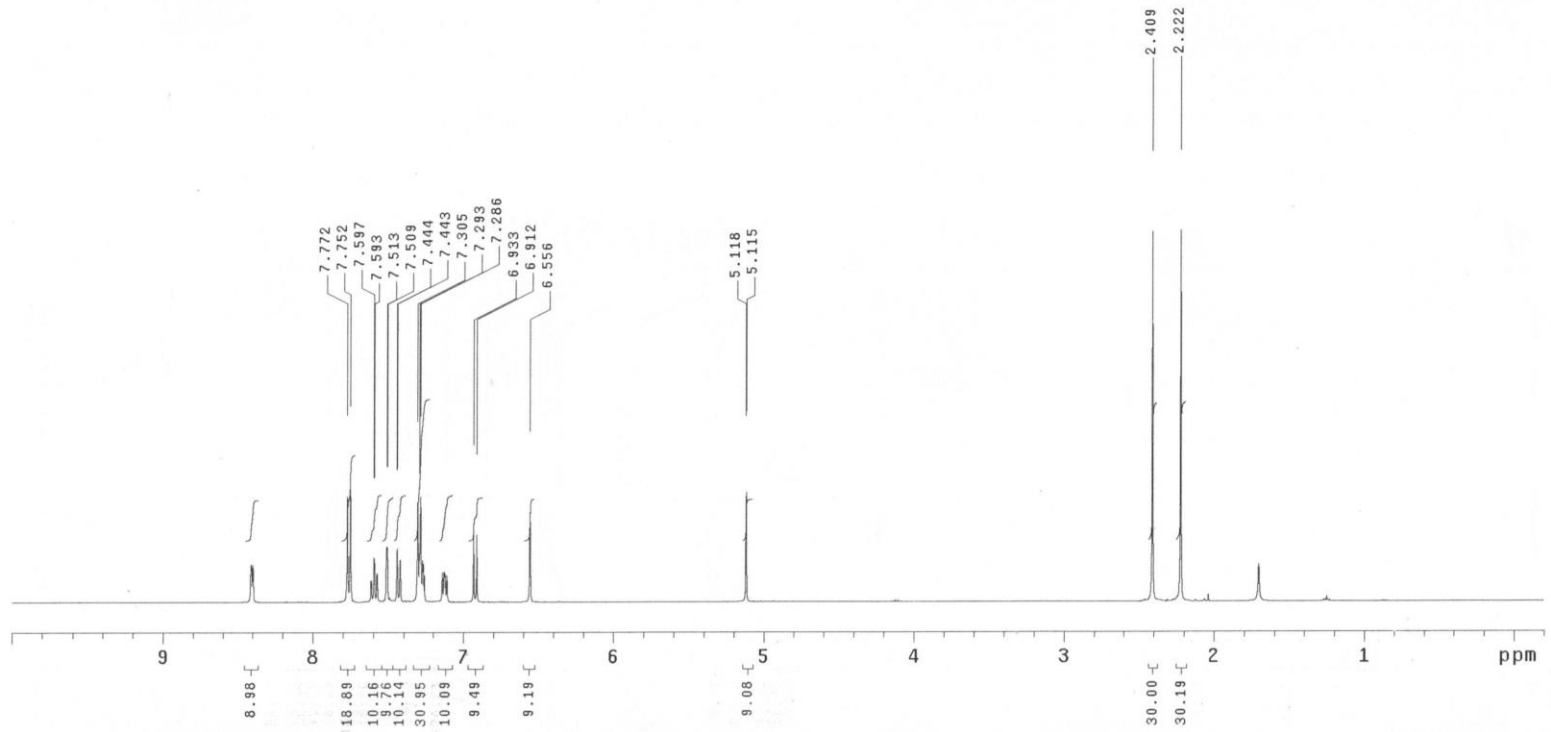

# Compound 2q (<sup>13</sup>C-NMR spectral data)

KT4MePY

Pulse Sequence: s2pu1  
UNITYplus-400 "unity400"  
Date: Jun 14 2019  
Solvent: CDC13  
Ambient temperature  
Total 1440 repetitions

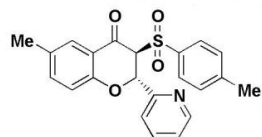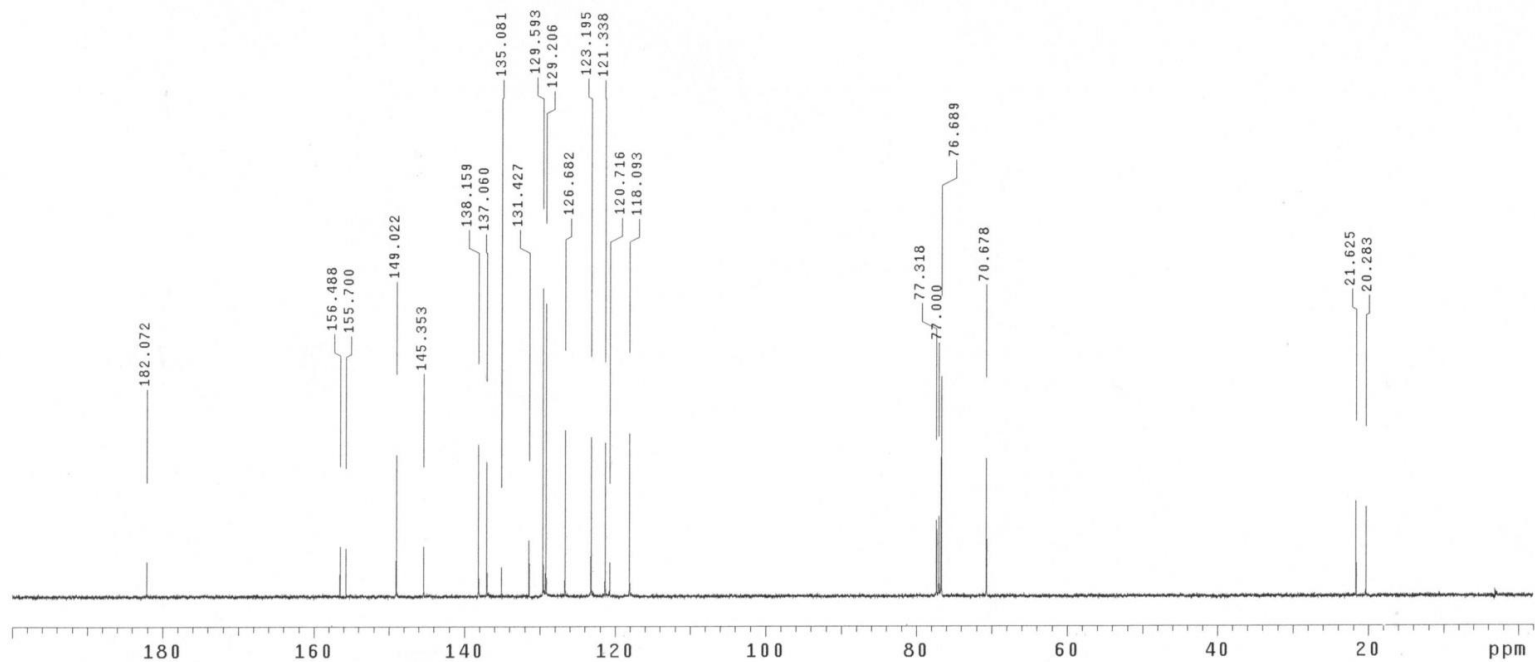

# Compound 2r (<sup>1</sup>H-NMR spectral data)

KTPhB5PB

Pulse Sequence: s2pu1  
UNITYplus-400 "unity400"  
Date: Sep 19 2019  
Solvent: CDCl<sub>3</sub>  
Ambient temperature  
Total 32 repetitions

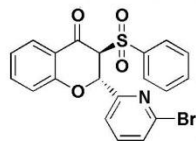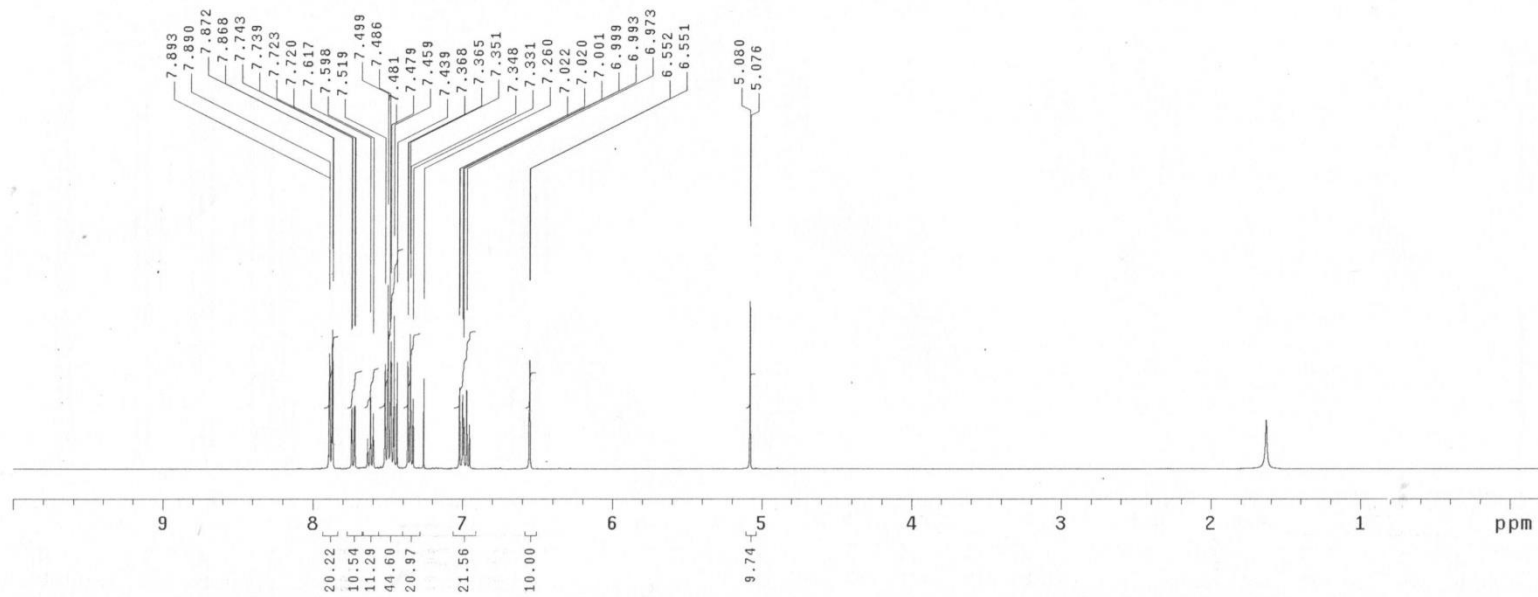

# Compound 2r (<sup>13</sup>C-NMR spectral data)

KTPbB5PB

Pulse Sequence: s2pu1  
UNITYplus-400 "unity400"  
Date: Sep 19 2019  
Solvent: CDCl<sub>3</sub>  
Ambient temperature  
Total 2272 repetitions

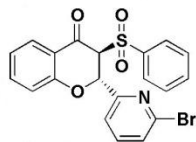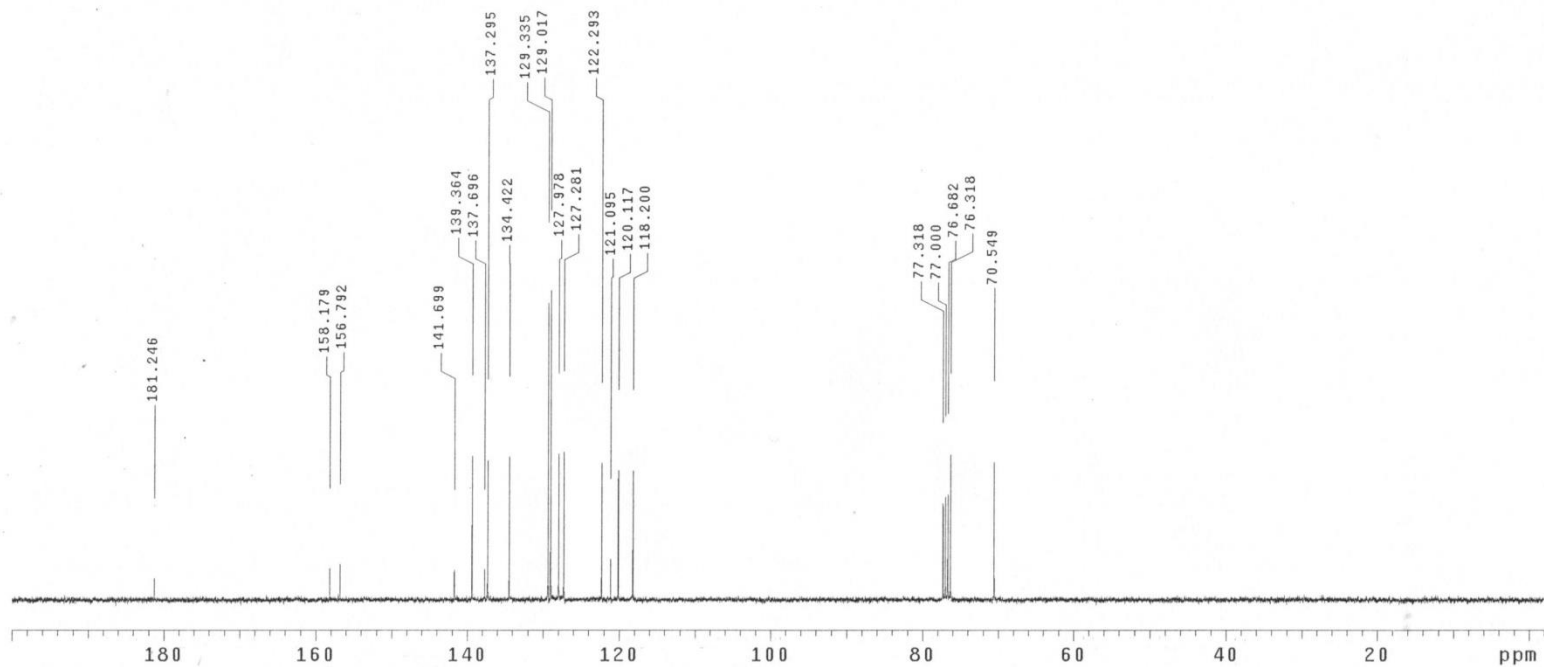

# Compound 2s (<sup>1</sup>H-NMR spectral data)

KTPHMsPB

Pulse Sequence: s2pu1  
UNITYplus-400 "unity400"  
Date: Sep 26 2019  
Solvent: CDCl<sub>3</sub>  
Ambient temperature  
Total 32 repetitions

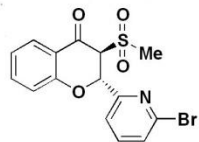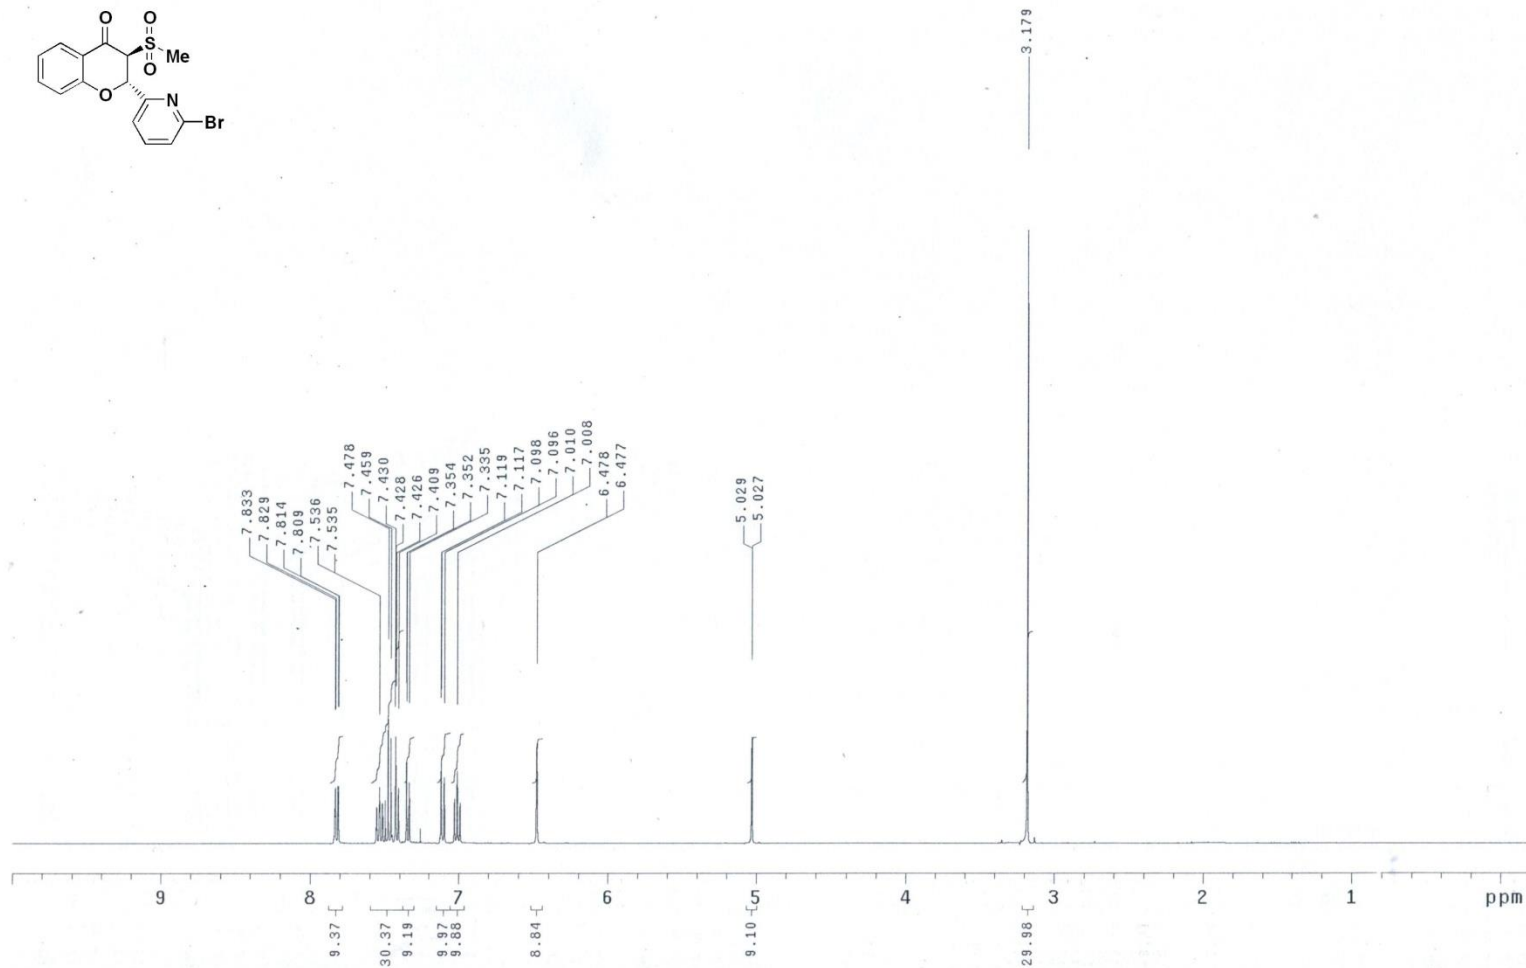

# Compound 2s (<sup>13</sup>C-NMR spectral data)

KTPHMsPB

Pulse Sequence: s2pu1  
UNITYplus-400 "unity400"  
Date: Sep 26 2019  
Solvent: CDC13  
Ambient temperature  
Total 320 repetitions

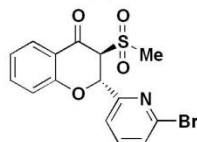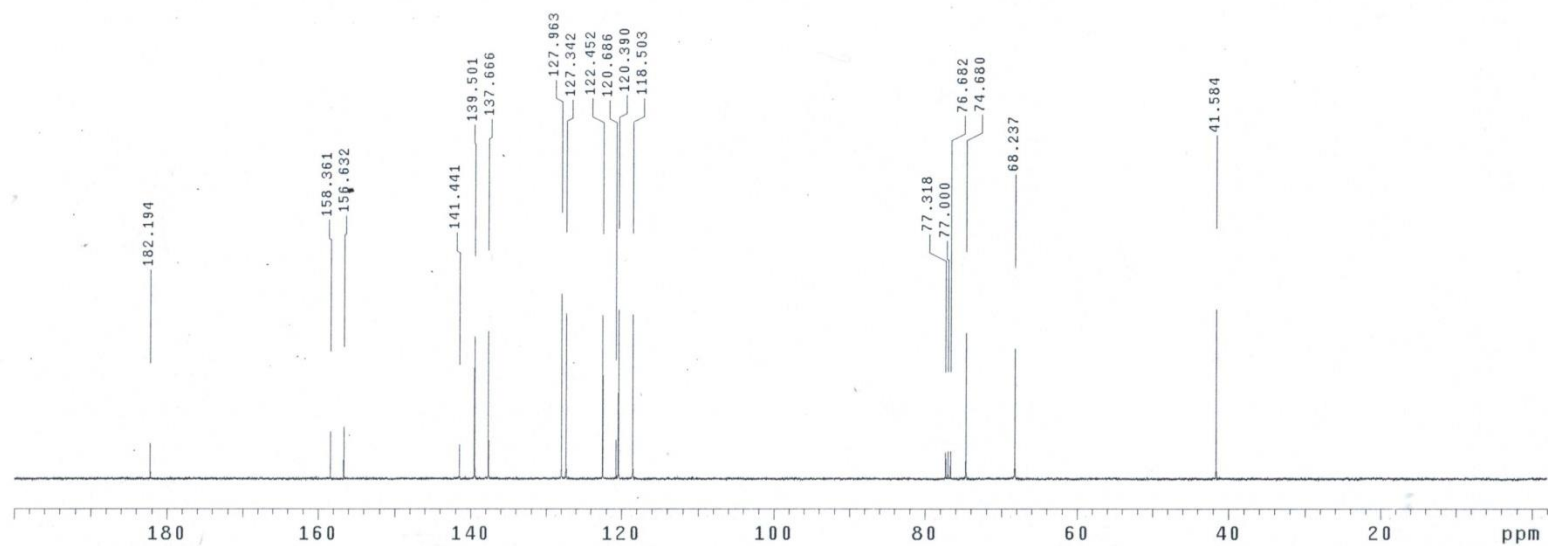

# Compound 2t (<sup>1</sup>H-NMR spectral data)

KTPPhC

Pulse Sequence: s2pu1  
UNITYplus-400 "unity400"  
Date: Sep 27 2019  
Solvent: CDCl3  
Ambient temperature  
Total 32 repetitions

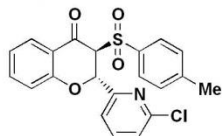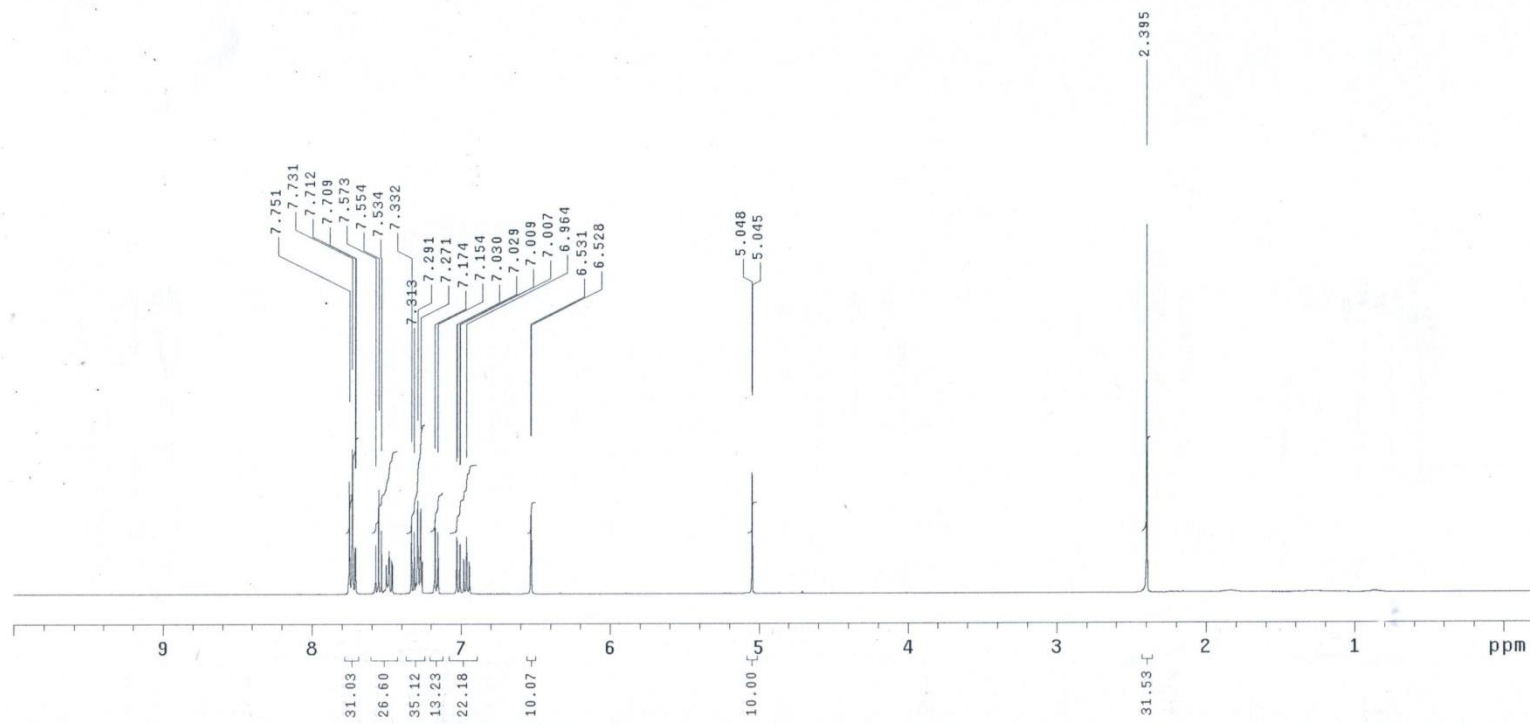



# Compound 2t (<sup>13</sup>C-NMR spectral data)

KTPPhC

Pulse Sequence: s2pu1

UNITYplus-400 "unity400"

Date: Sep 27 2019

Solvent: CDCl<sub>3</sub>

Ambient temperature

Total 640 repetitions

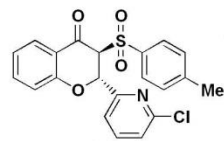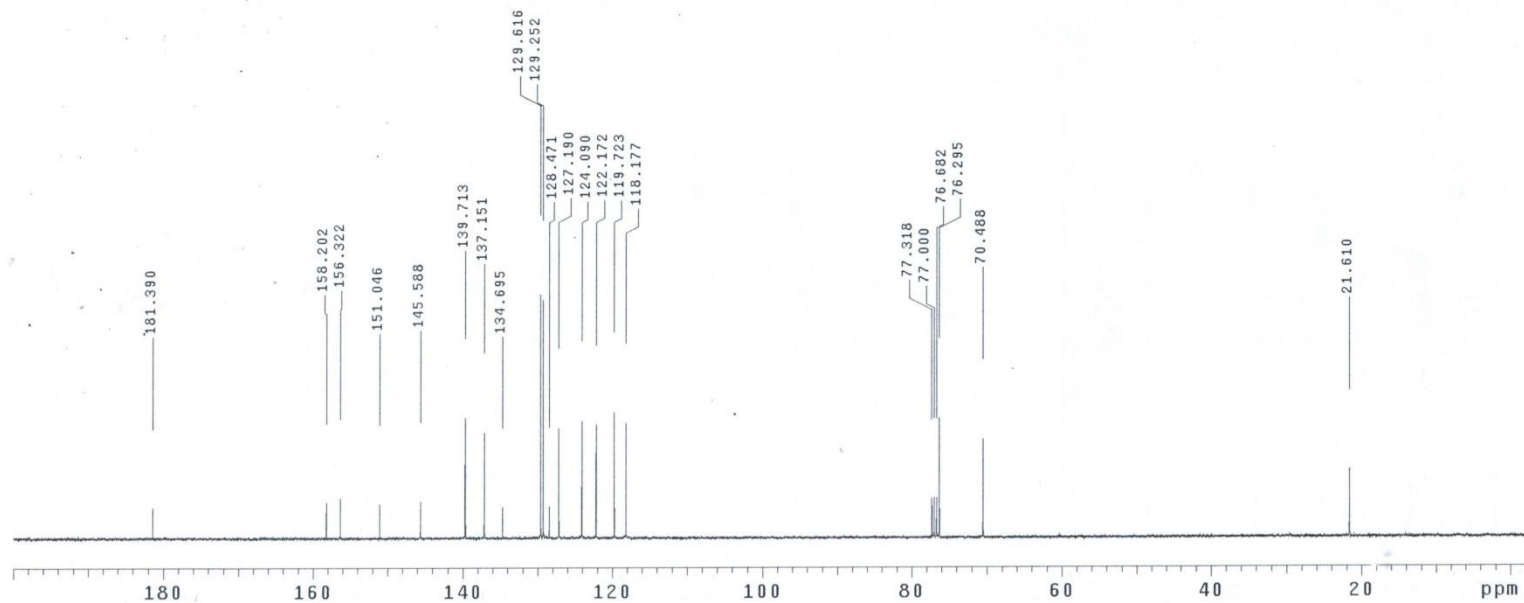

# Compound 2u (<sup>1</sup>H-NMR spectral data)

KTPhPM

Pulse Sequence: s2pu1  
UNITYplus-400 "unity400"  
Date: Oct 7 2019  
Solvent: CDCl3  
Ambient temperature  
Total 32 repetitions

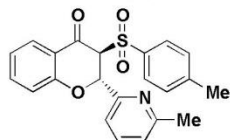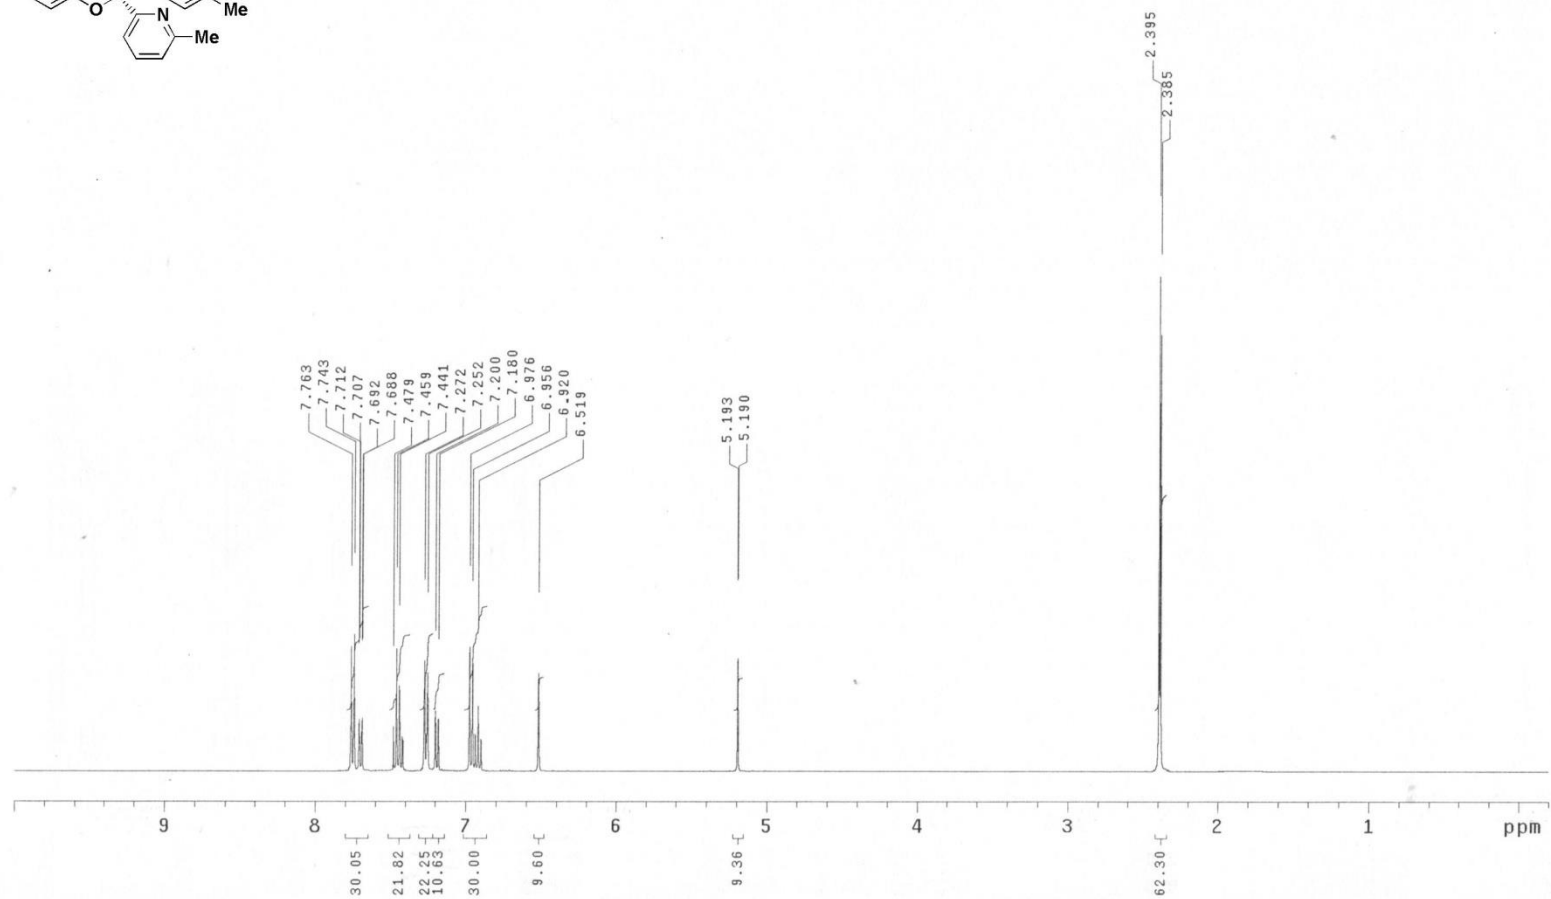

# Compound 2u (<sup>13</sup>C-NMR spectral data)

KTPbPM

Pulse Sequence: s2pu1  
UNITYplus-400 "unity400"  
Date: Oct 7 2019  
Solvent: CDCl<sub>3</sub>  
Ambient temperature  
Total 528 repetitions

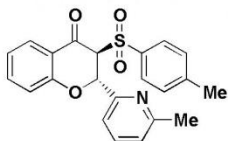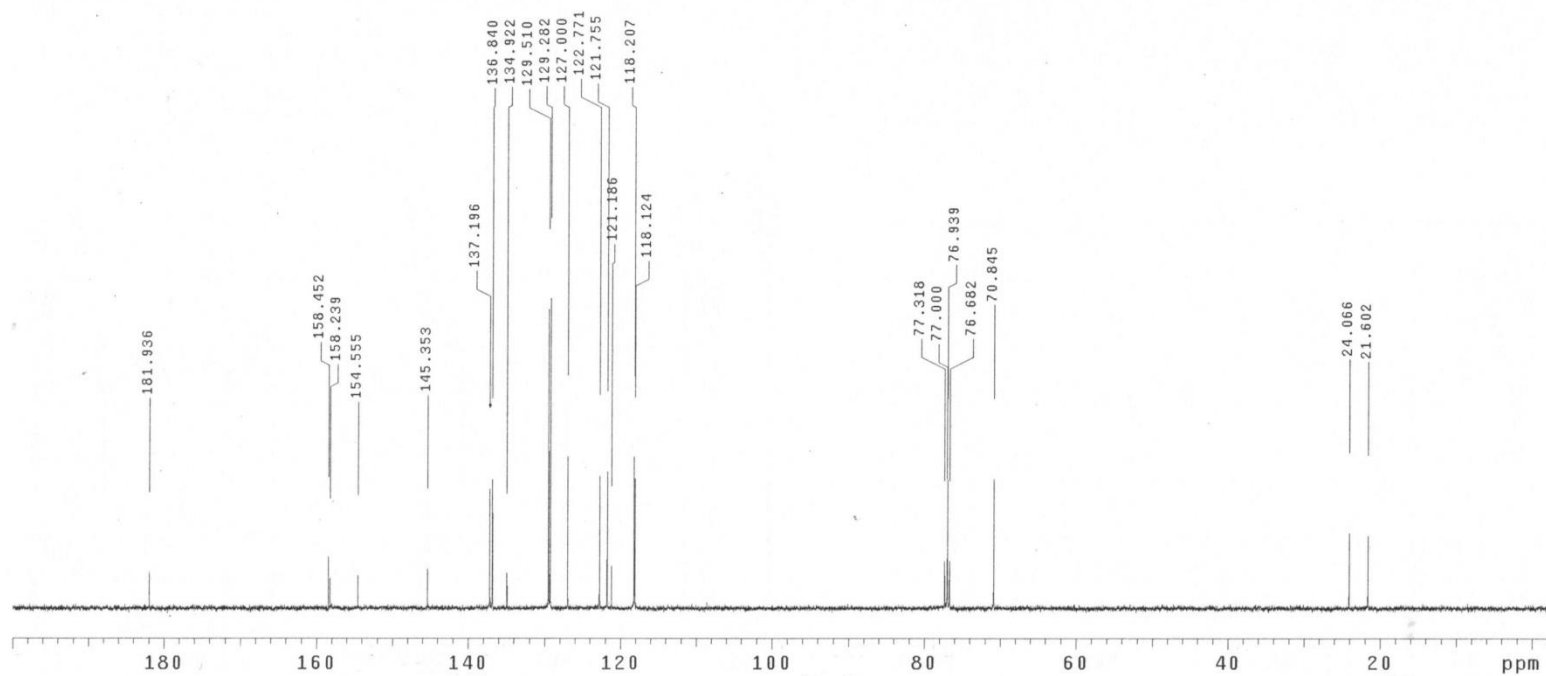

# Compound 2v (<sup>1</sup>H-NMR spectral data)

HAOMePYBr

Pulse Sequence: s2pu1  
UNITYplus-400 "unity400"  
Date: Aug 2 2018  
Solvent: CDC13  
Ambient temperature  
Total 32 repetitions

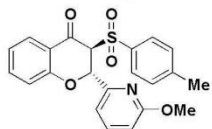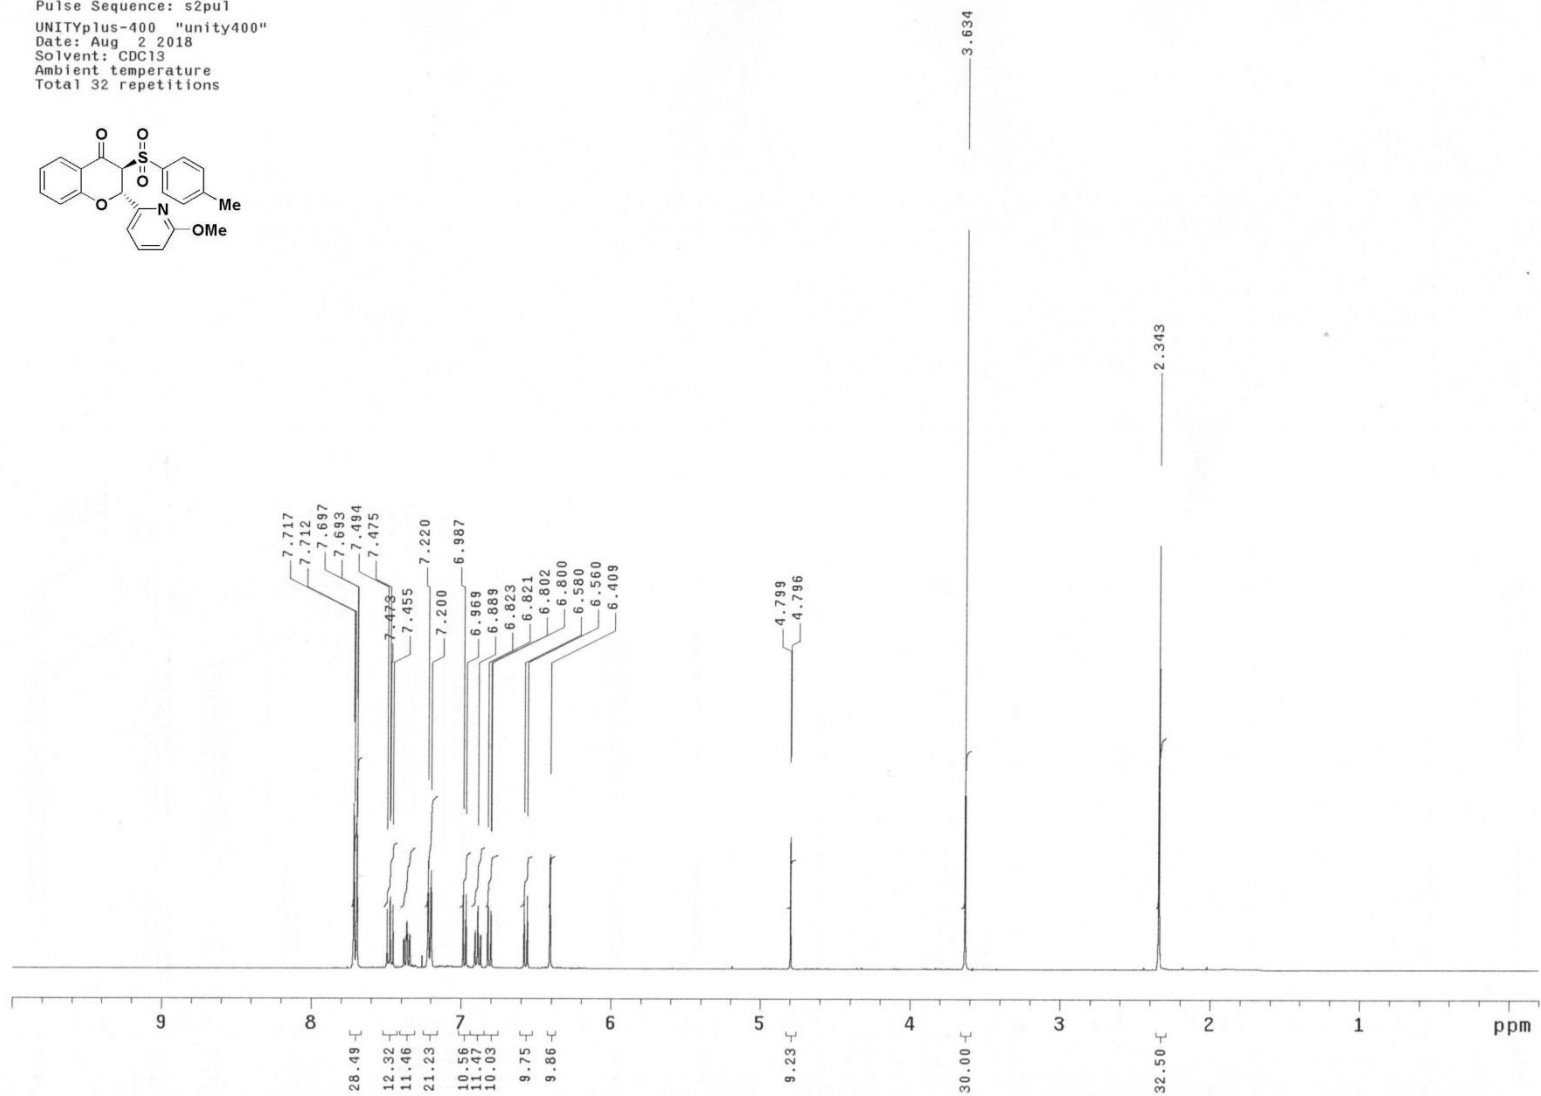

# Compound 2v (<sup>13</sup>C-NMR spectral data)

HAOMePYBr

Pulse Sequence: s2pu1  
UNITYplus-400 "unity400"  
Date: Aug 2 2018  
Solvent: CDCl3  
Ambient temperature  
Total 272 repetitions

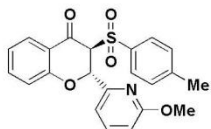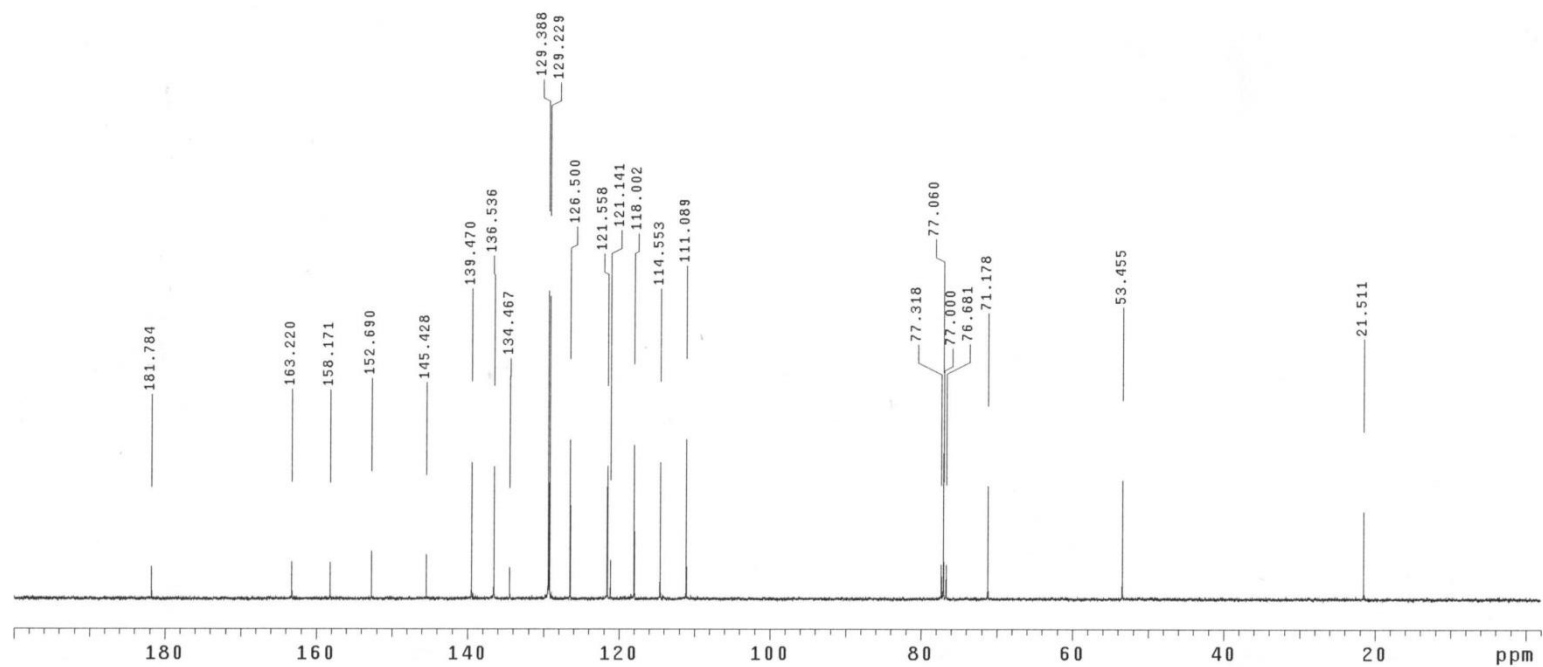

# Compound 2w (<sup>1</sup>H-NMR spectral data)

HA1070420

Pulse Sequence: s2pu1  
UNITYplus-400 "unity400"  
Date: Apr 13 2018  
Solvent: CDCl<sub>3</sub>  
Ambient temperature  
Total 32 repetitions

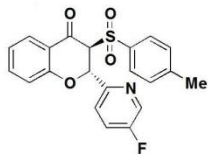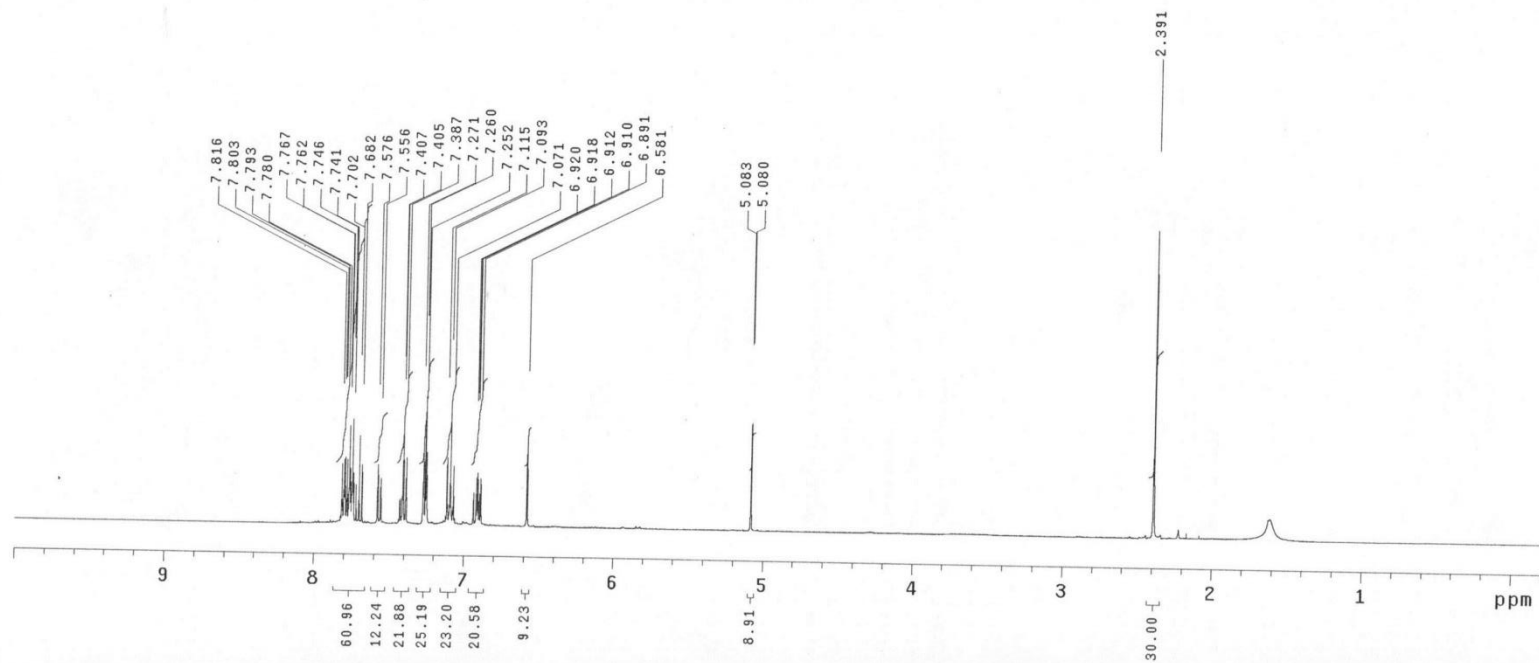

# Compound 2w (<sup>13</sup>C-NMR spectral data)

HA1070419

Pulse Sequence: s2pu1  
UNITYplus-400 "unity400"  
Date: Apr 19 2018  
Solvent: CDC13  
Ambient temperature  
Total 192 repetitions

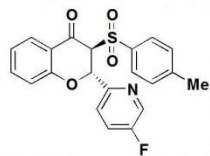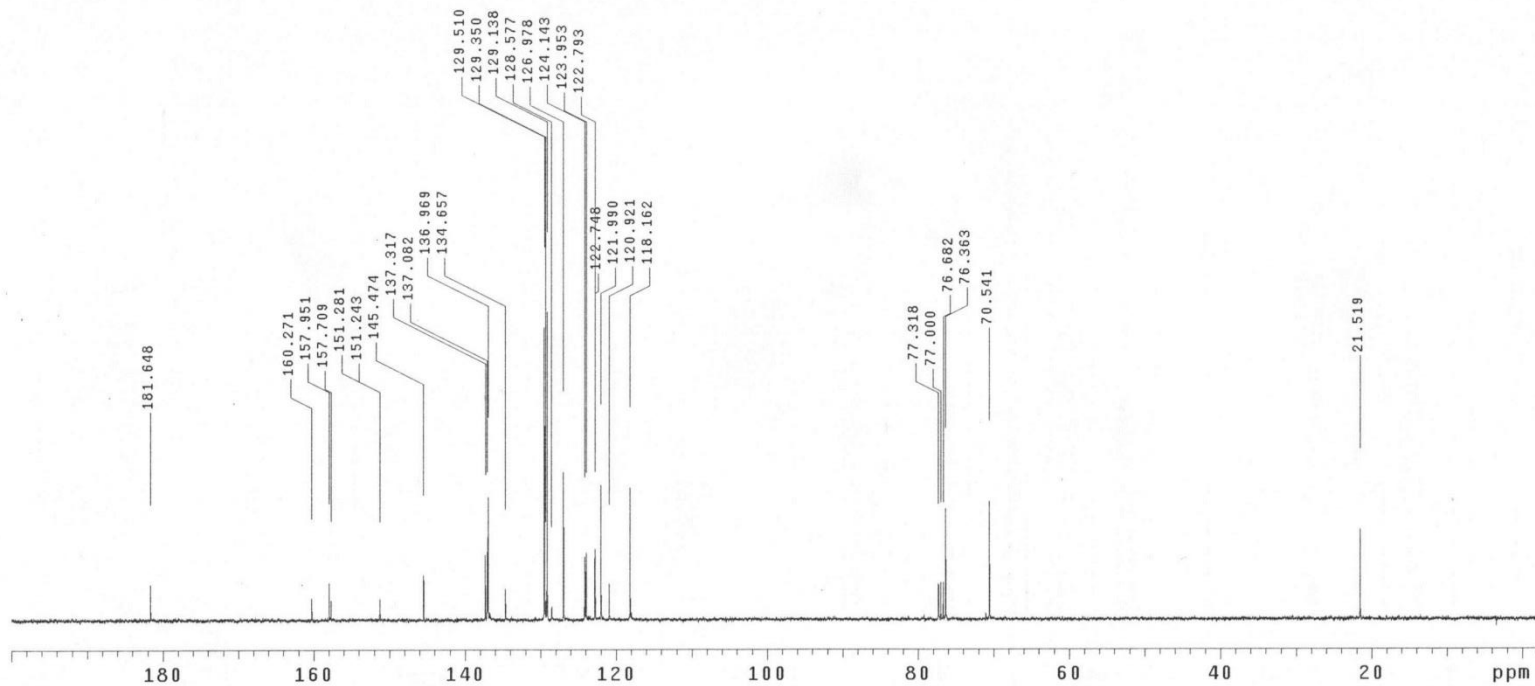

# Compound 2x (<sup>1</sup>H-NMR spectral data)

HA1070419

Pulse Sequence: s2pu1  
UNITYplus-400 "unity400"  
Date: Apr 19 2018  
Solvent: CDC13  
Ambient temperature  
Total 32 repetitions

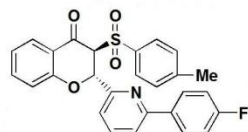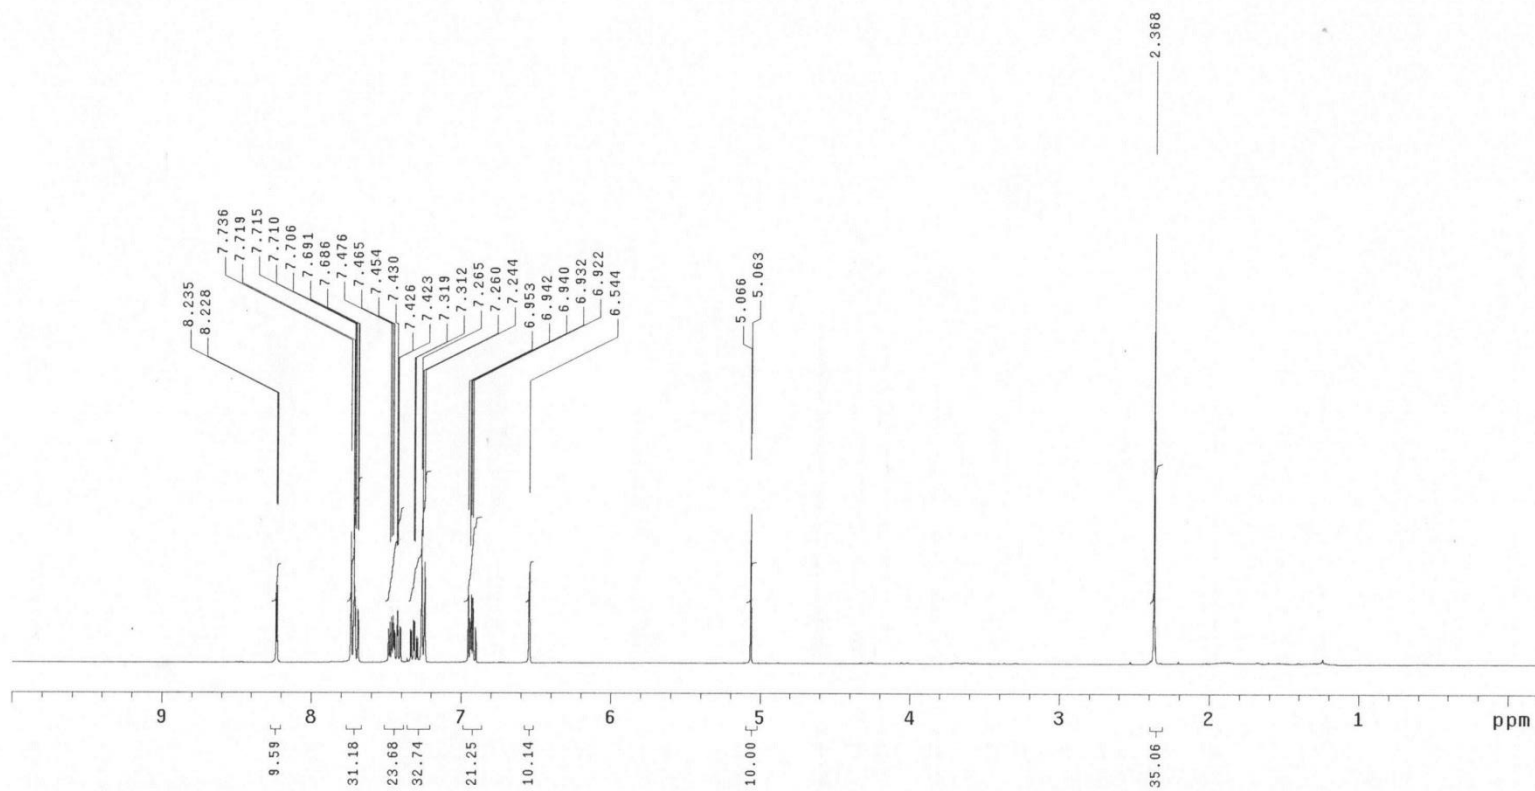



# Compound 2x (<sup>13</sup>C-NMR spectral data)

HA1070420

Pulse Sequence: s2pu1  
UNITYplus-400 "unity400"  
Date: Apr 19 2018  
Solvent: CDCl<sub>3</sub>  
Ambient temperature  
Total 1024 repetitions

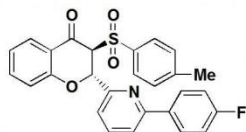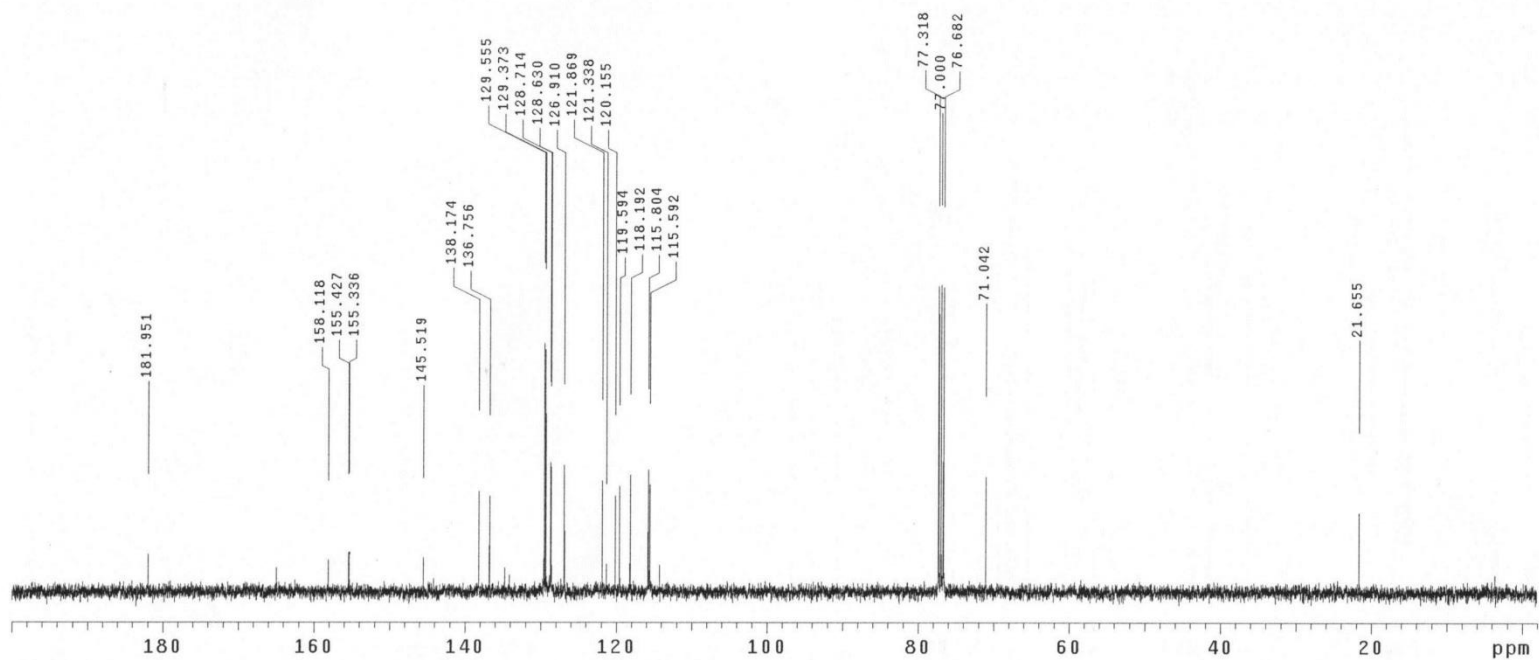

# Compound 3a (<sup>1</sup>H-NMR spectral data)

HANBrBu

Pulse Sequence: s2pu1  
UNITYplus-400 "unity400"  
Date: Mar 20 2018  
Solvent: CDCl<sub>3</sub>  
Ambient temperature  
Total 32 repetitions

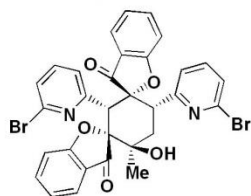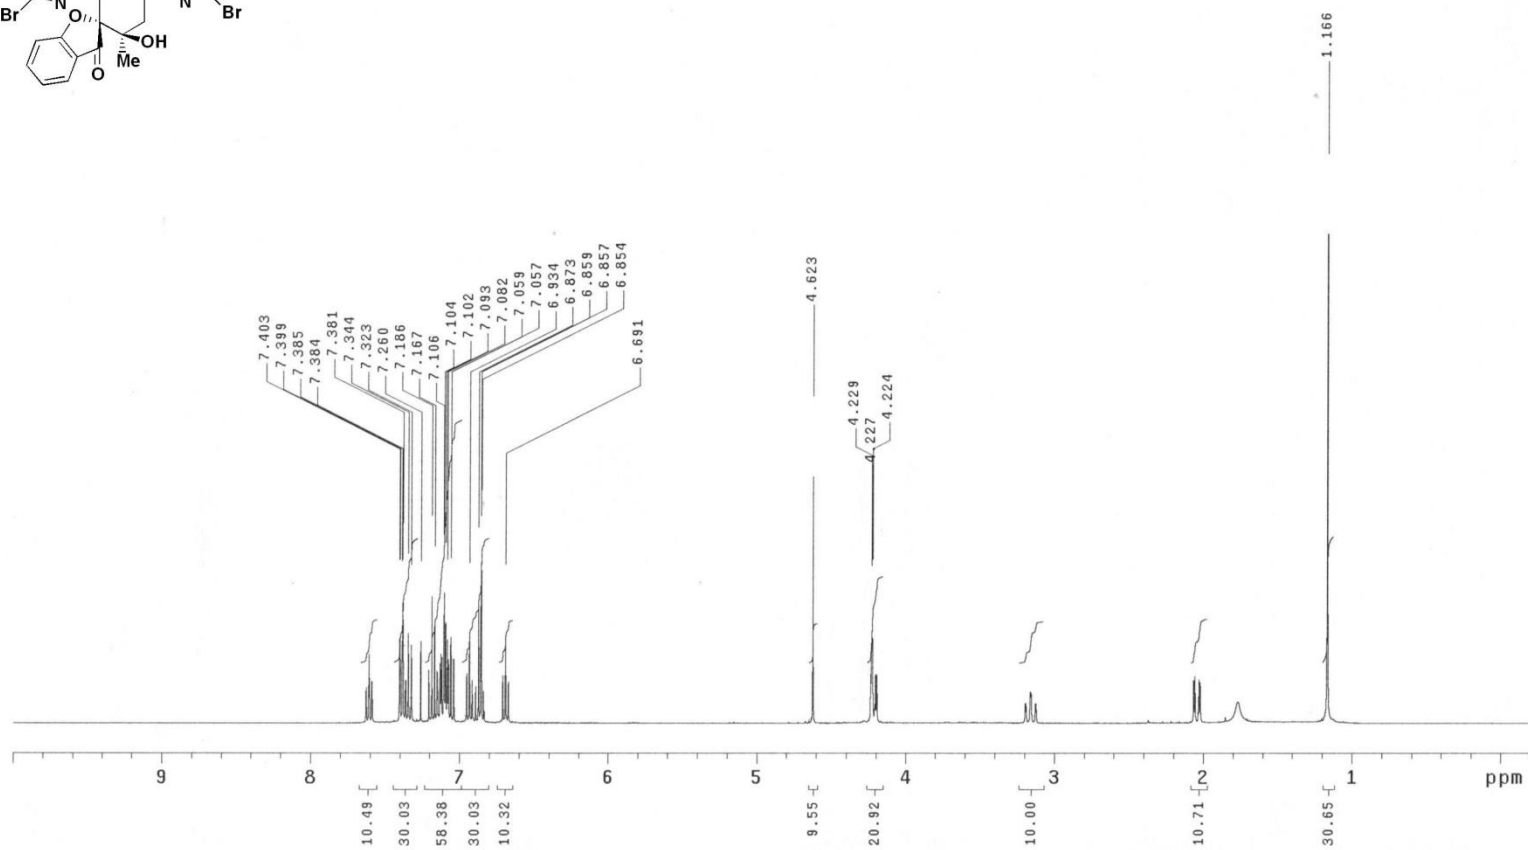



# Compound 3b (<sup>1</sup>H-NMR spectral data)

HAFPyBr

Pulse Sequence: s2pu1

UNITYplus-400 "unity400"

Date: Jan 15 2019

Solvent: CDCl<sub>3</sub>

Ambient temperature

Total 32 repetitions

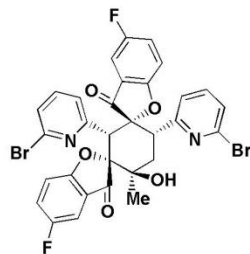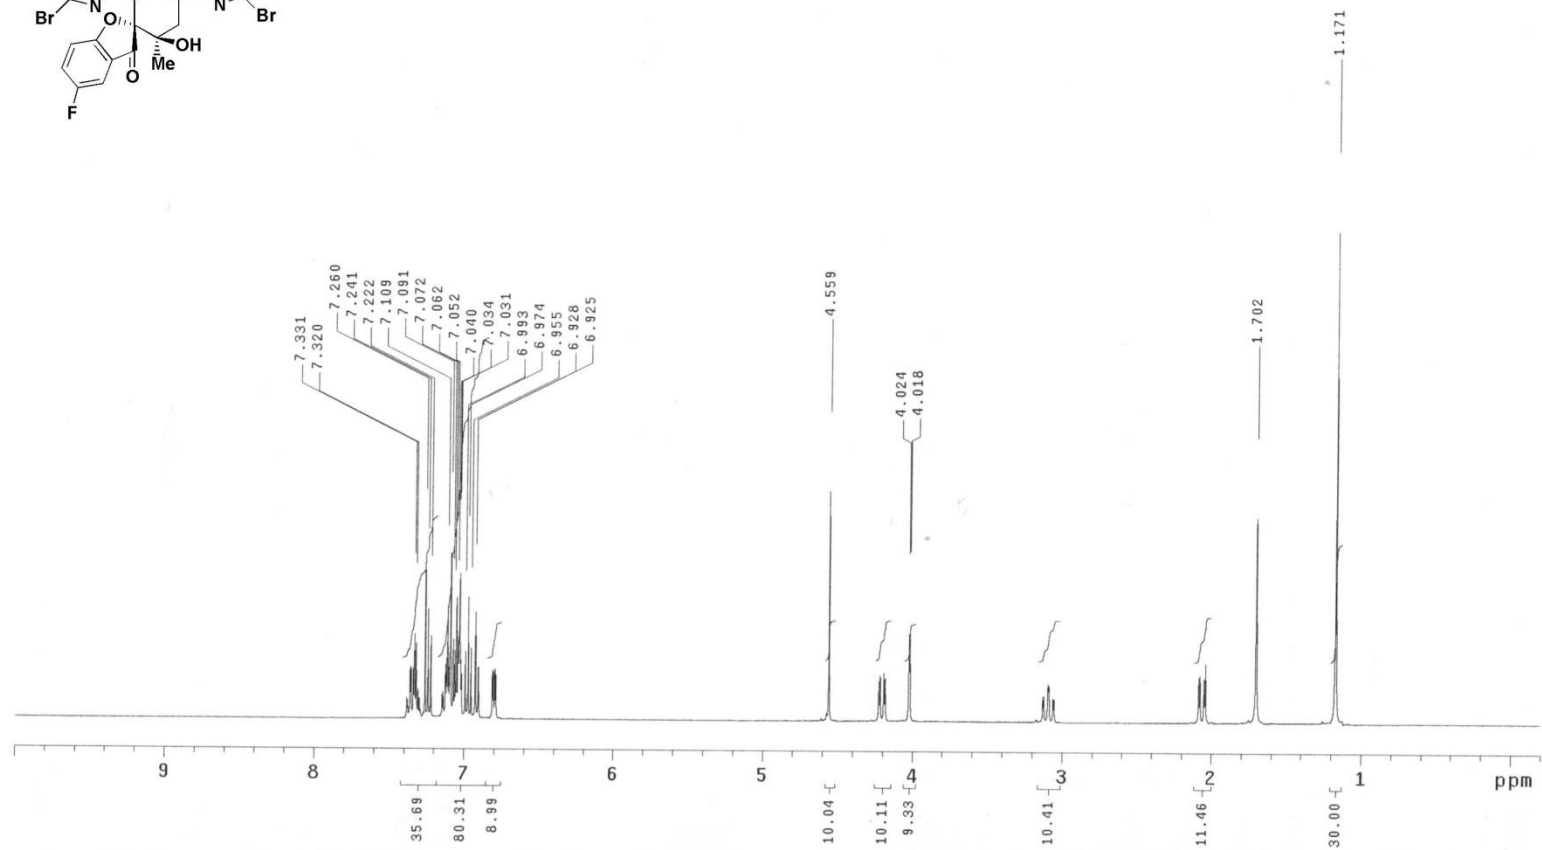

# Compound 3b (<sup>13</sup>C-NMR spectral data)

HAFPyBr

Pulse Sequence: s2pu1  
UNITYplus-400 "unity400"  
Date: Jan 15 2019  
Solvent: CDCl<sub>3</sub>  
Ambient temperature  
Total 2048 repetitions

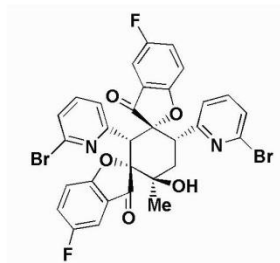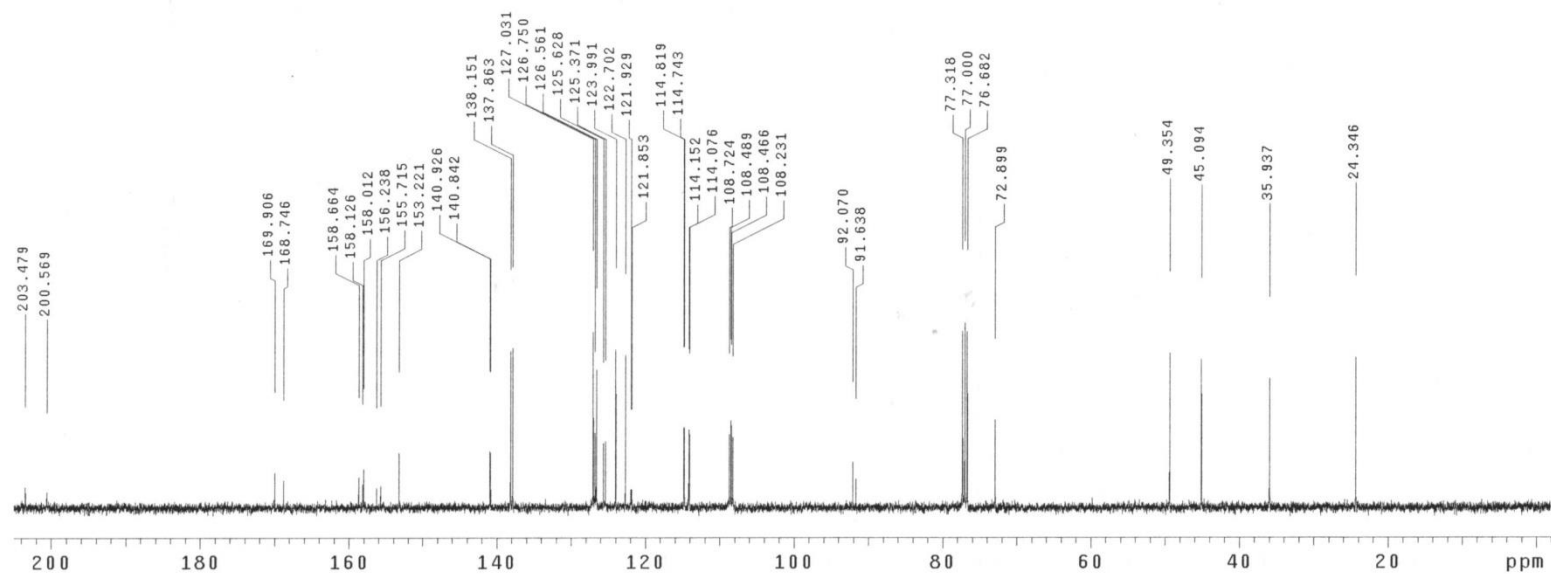

# Compound 3c (<sup>1</sup>H-NMR spectral data)

HA4BrPB

Pulse Sequence: s2pul  
UNITYplus-400 "unity400"  
Date: Jan 2 2019  
Solvent: CDCl<sub>3</sub>  
Ambient temperature  
Total 64 repetitions

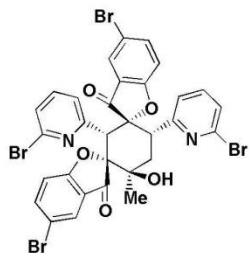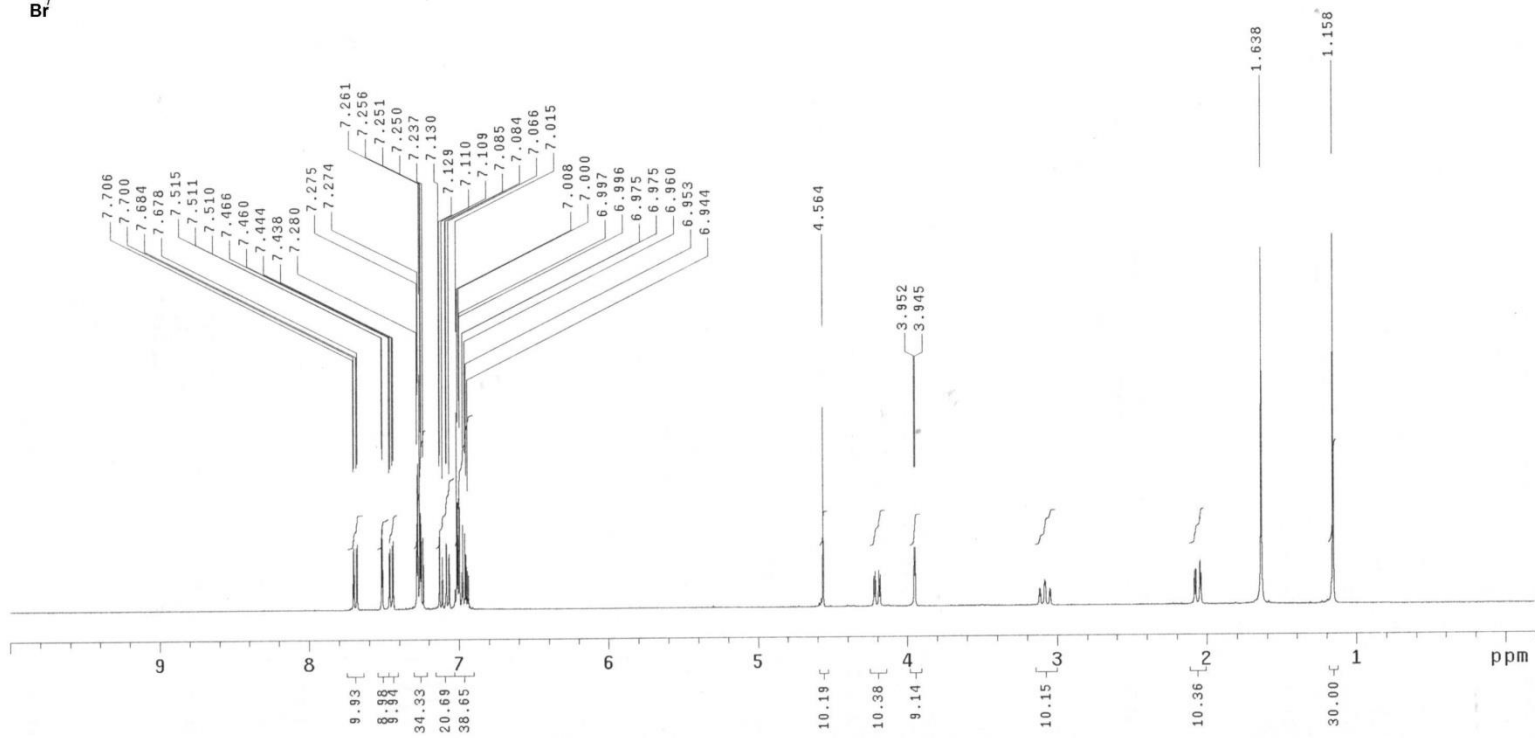

# Compound 3c (<sup>13</sup>C-NMR spectral data)

HA4BrPB

Pulse Sequence: s2pu1  
UNITYplus-400 "unity400"  
Date: Jan 2 2019  
Solvent: CDCl<sub>3</sub>  
Ambient temperature  
Total 8944 repetitions

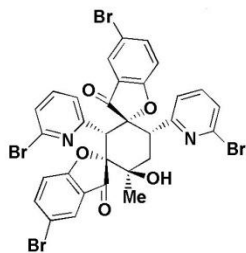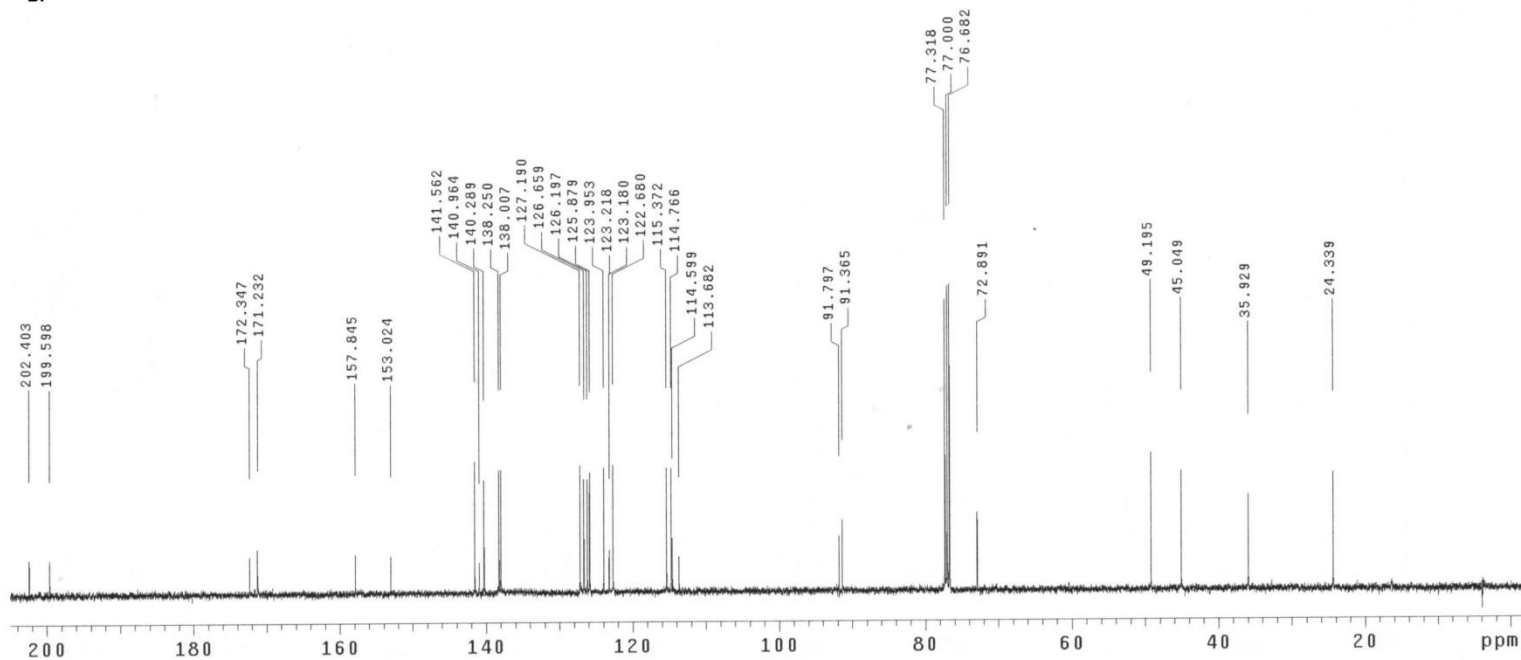

# Compound 3d (<sup>1</sup>H-NMR spectral data)

HA1epyBr

Pulse Sequence: s2pu1

UNITYplus-400 "unity400"

Date: Jan 9 2019

Solvent: CDCl<sub>3</sub>

Ambient temperature

Total 64 repetitions

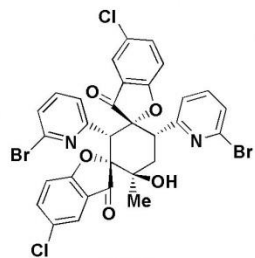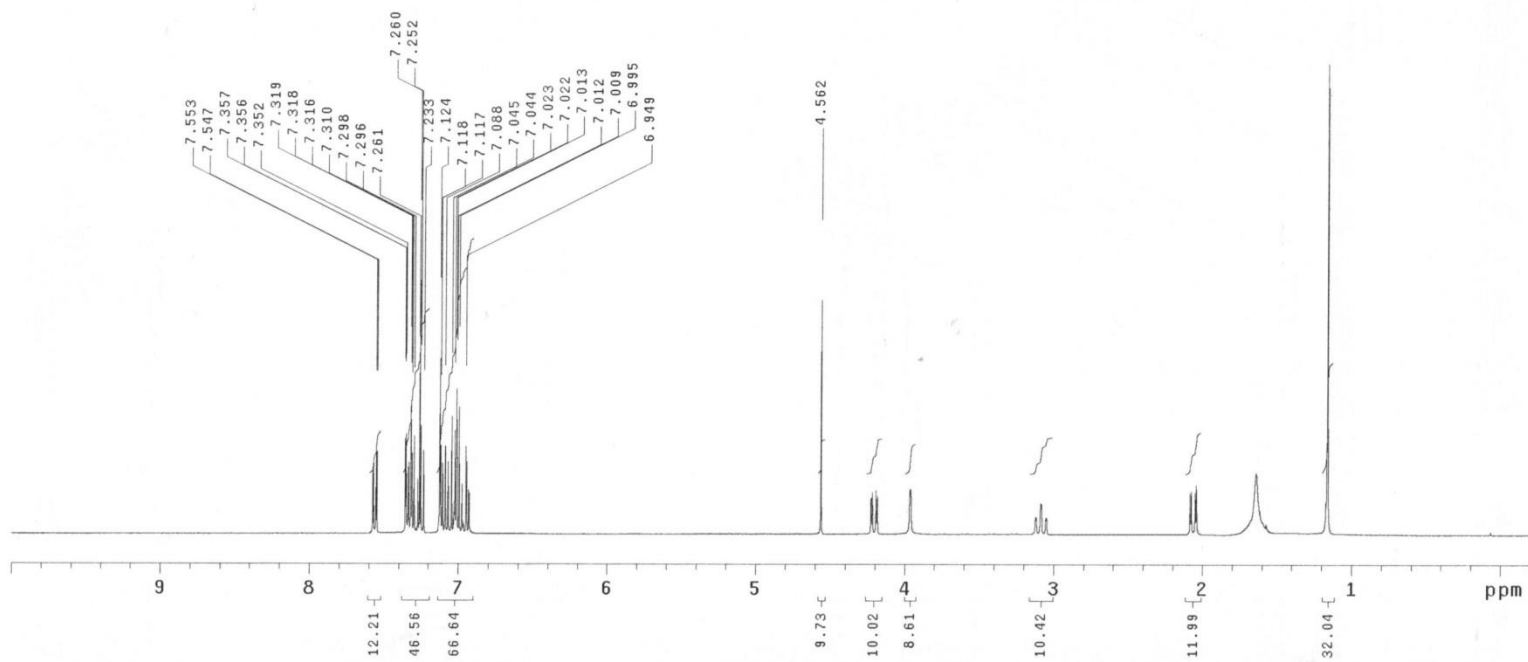



# Compound 3d (<sup>13</sup>C-NMR spectral data)

HA1epyBr

Pulse Sequence: s2pu1  
UNITYplus-400 "unity400"  
Date: Jan 9 2019  
Solvent: CDCl3  
Ambient temperature  
Total 32000 repetitions

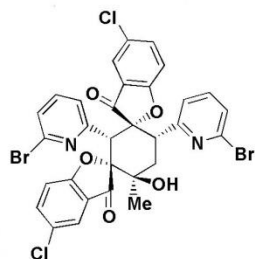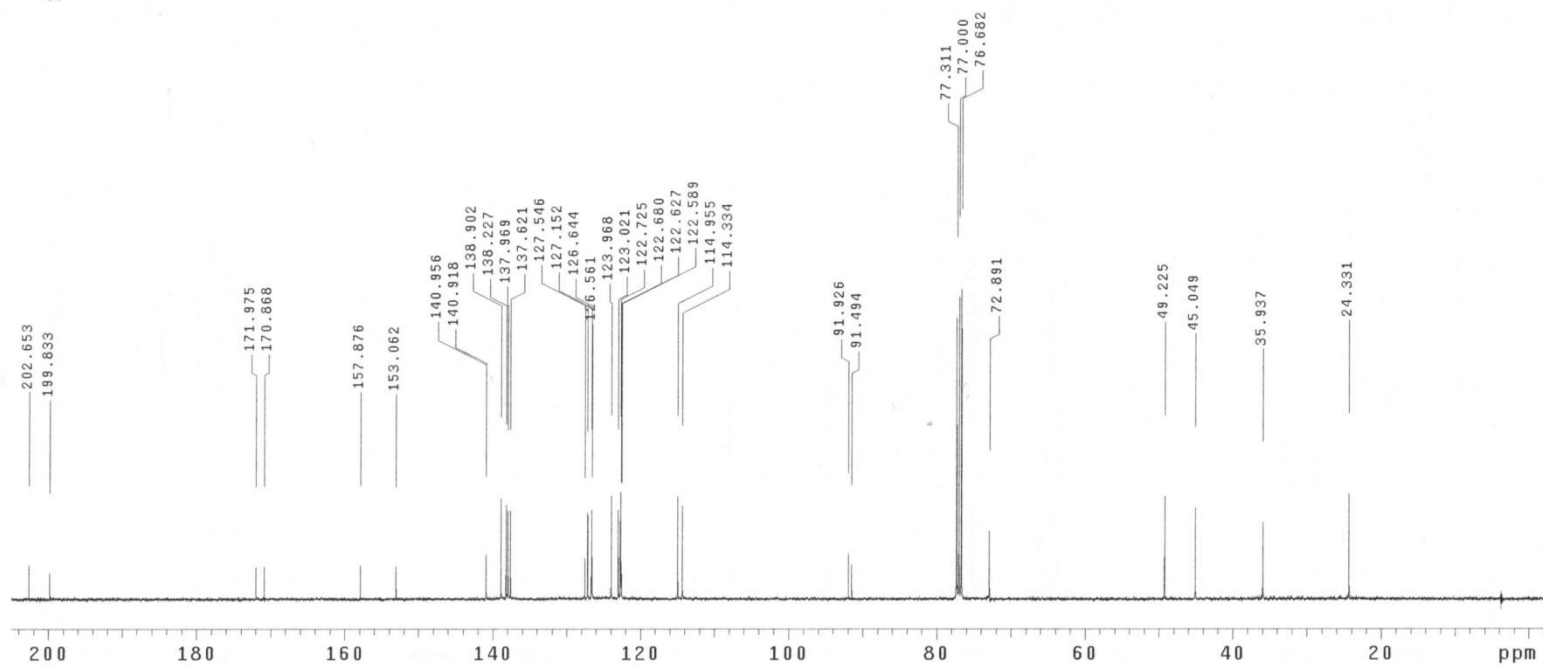

# Compound 3e (<sup>1</sup>H-NMR spectral data)

KT1080718

Pulse Sequence: s2pu1  
UNITYplus-400 "unity400"  
Date: Jul 22 2019  
Solvent: CDCl<sub>3</sub>  
Ambient temperature  
Total 32 repetitions

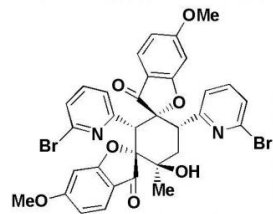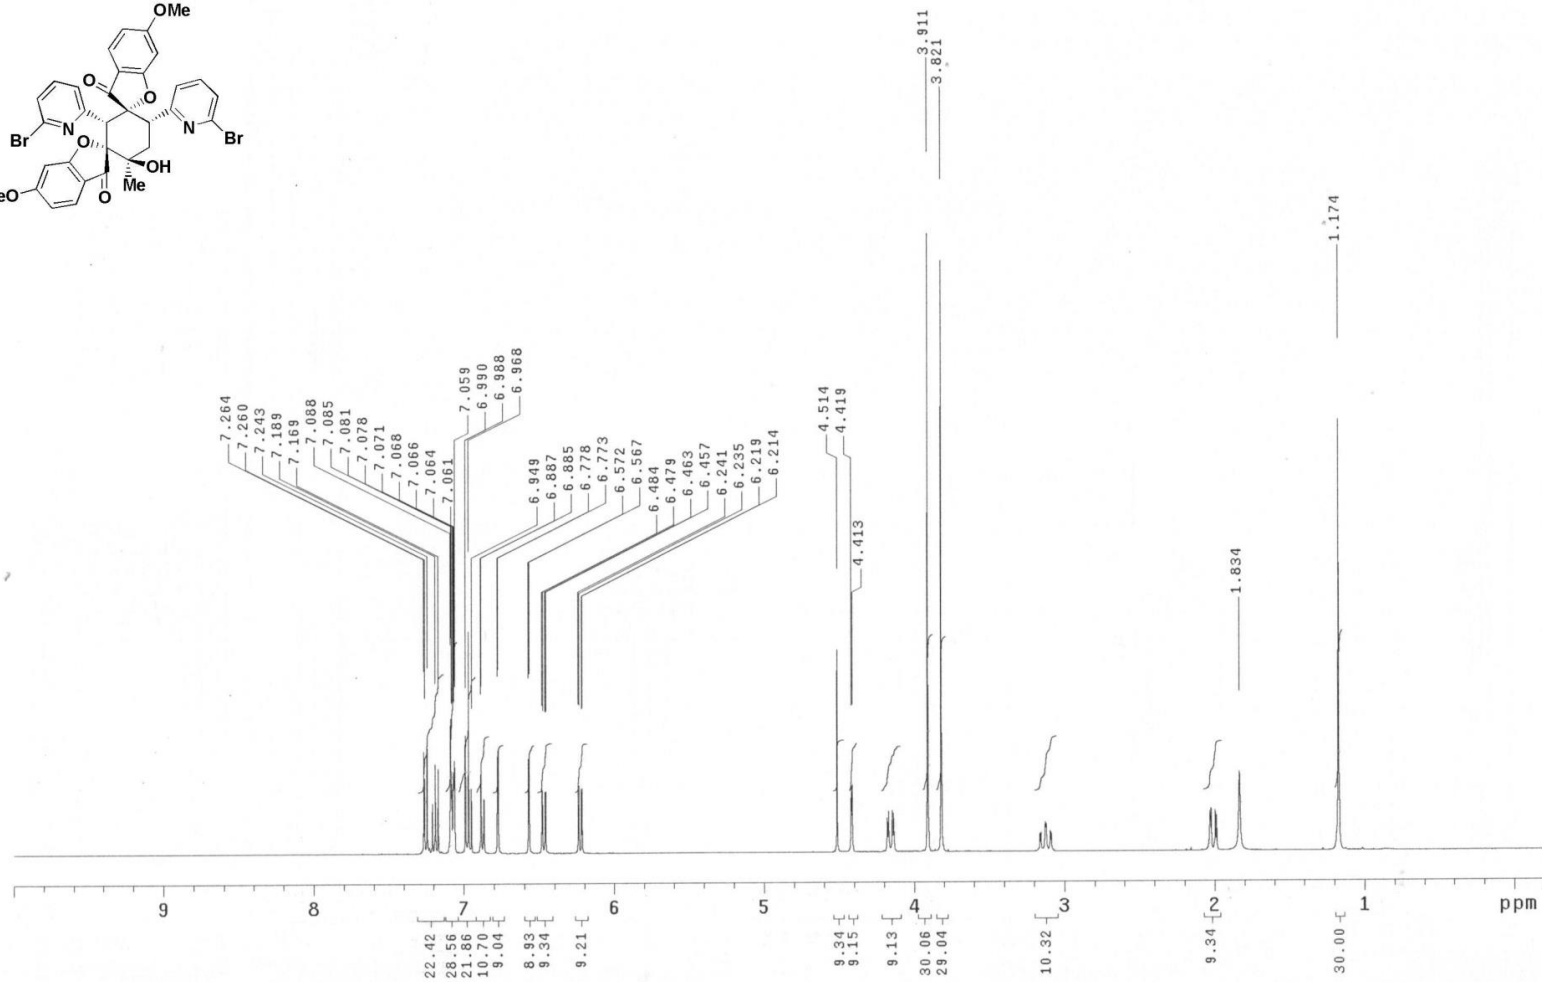

15.82

# Compound 3e (<sup>13</sup>C-NMR spectral data)

KT1080718

Pulse Sequence: s2pu1  
UNITYplus-400 "unity400"  
Date: Jul 22 2019  
Solvent: CDCl<sub>3</sub>  
Ambient temperature  
Total 1776 repetitions

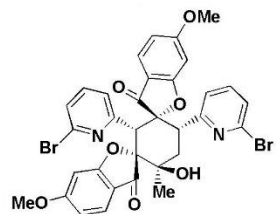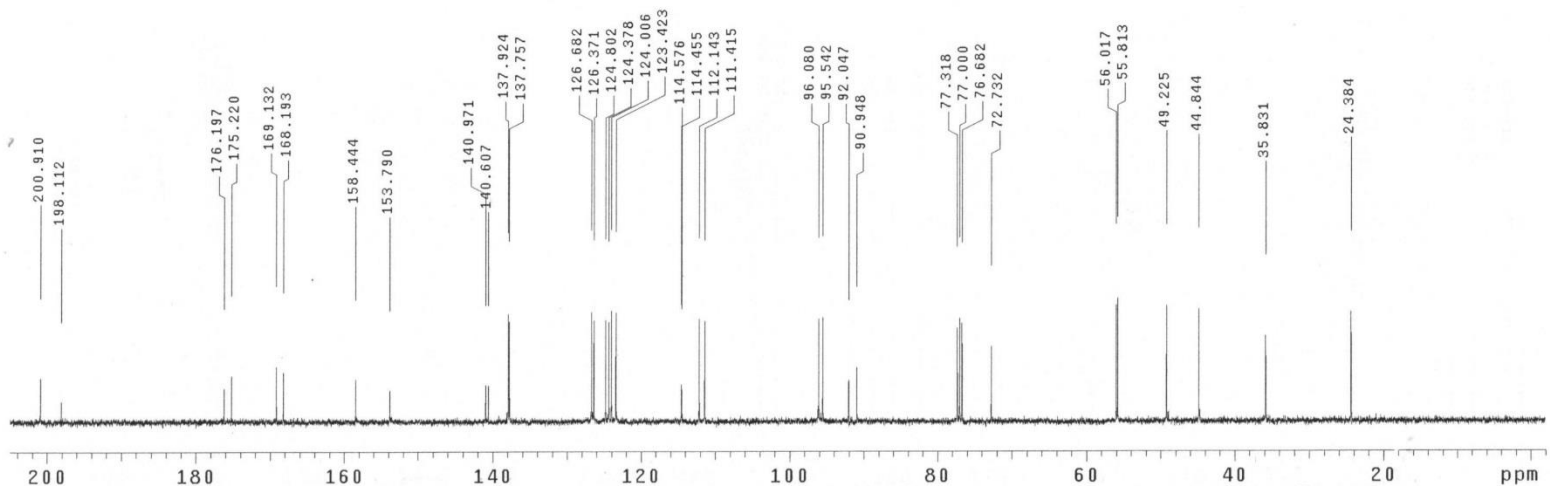

# Compound 3f (<sup>1</sup>H-NMR spectral data)

HA.NAPYBr

Pulse Sequence: s2pu1  
UNITYplus-400 "unity400"  
Date: Jan 29 2019  
Solvent: CDCl<sub>3</sub>  
Ambient temperature  
Total 60 repetitions

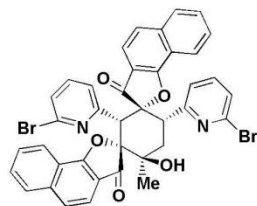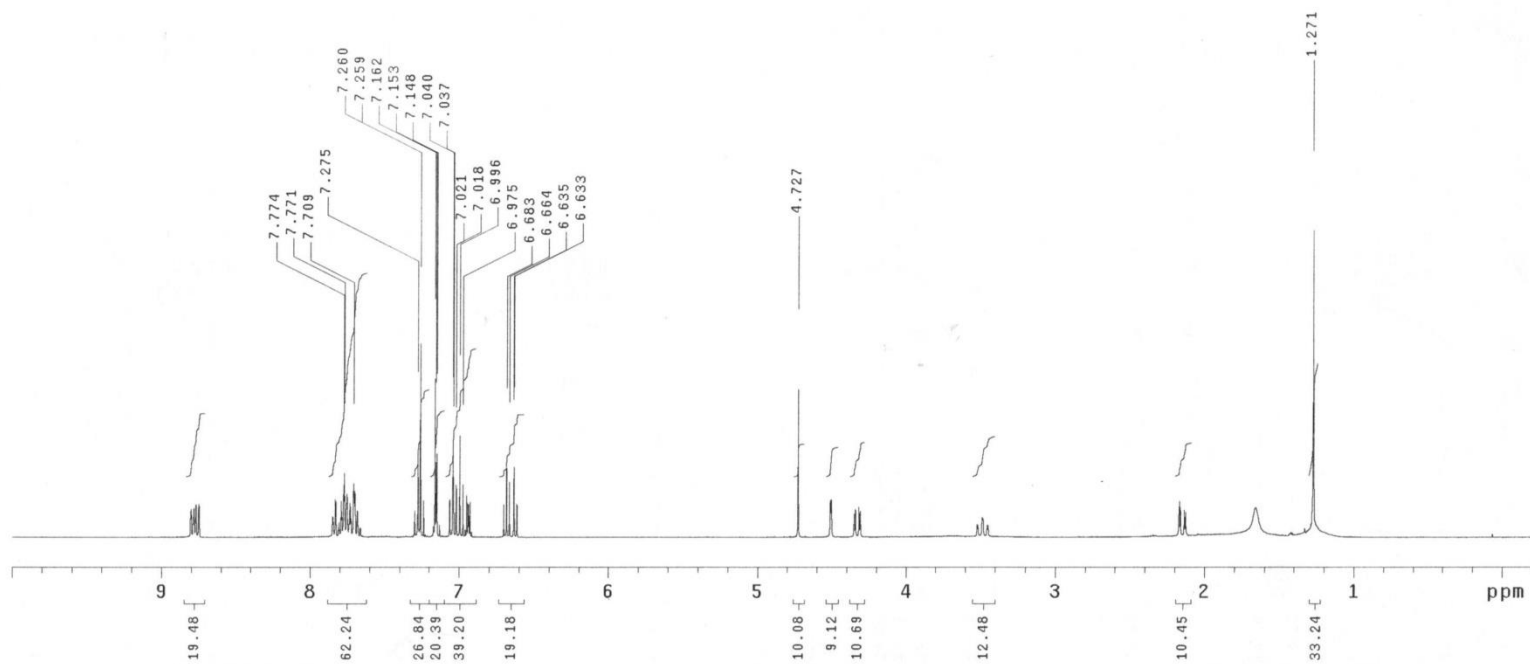

# Compound 3f (<sup>13</sup>C-NMR spectral data)

HA.NAPYBr

Pulse Sequence: s2pu1  
UNITYplus-400 "unity400"  
Date: Jan 29 2019  
Solvent: CDCl<sub>3</sub>  
Ambient temperature  
Total 29296 repetitions

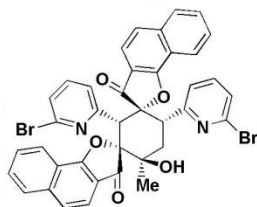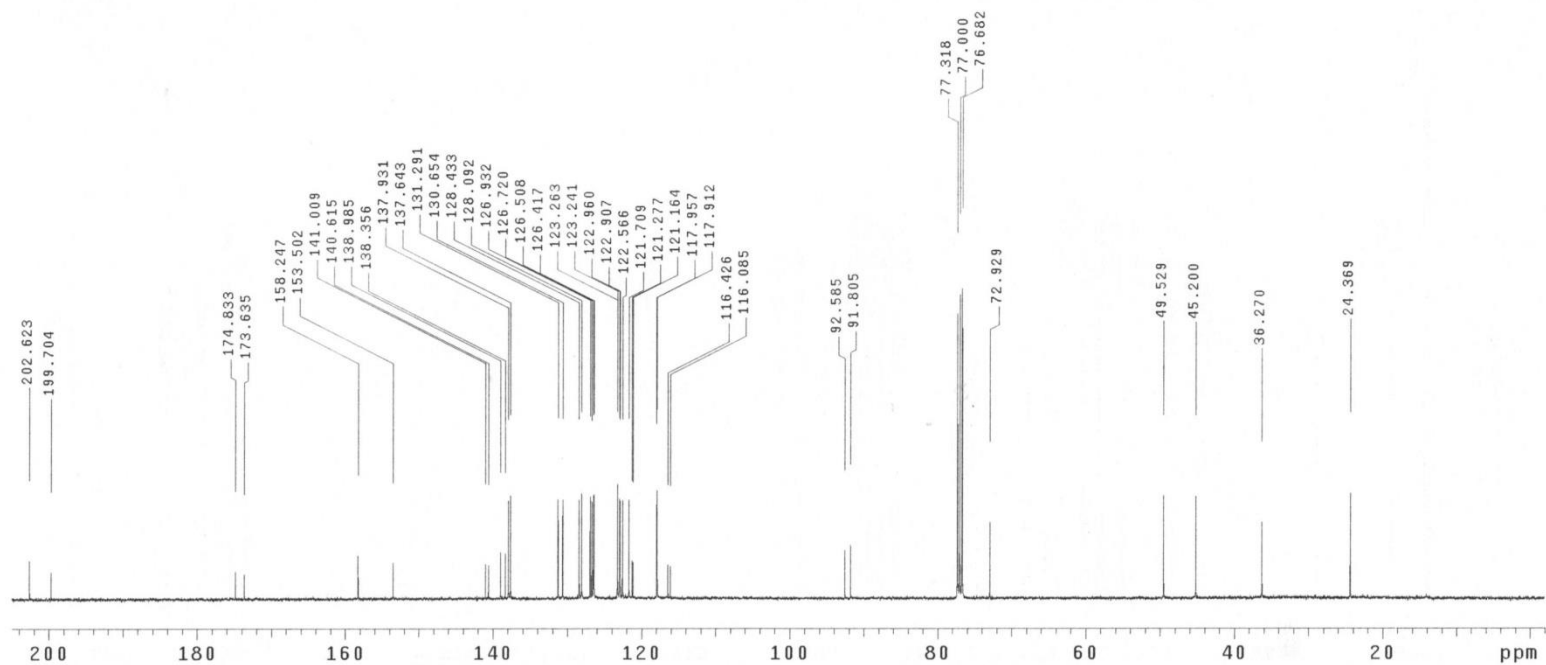

# Compound 3g (<sup>1</sup>H-NMR spectral data)

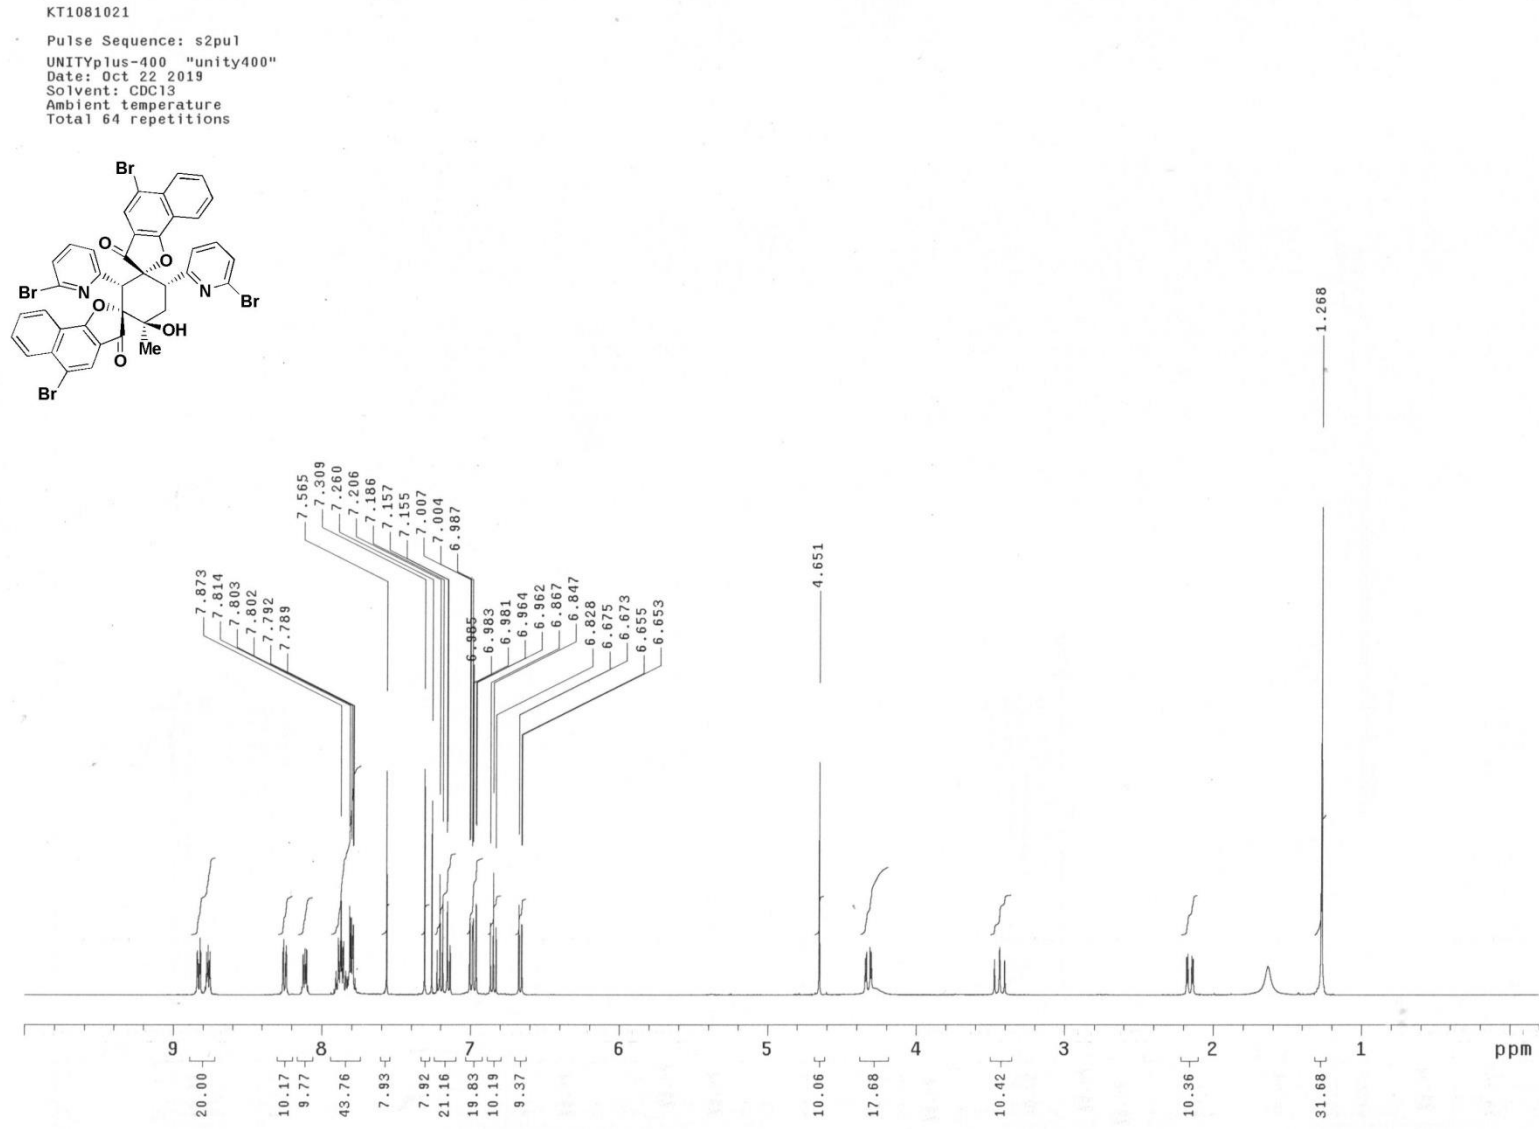

# Compound 3g (<sup>13</sup>C-NMR spectral data)

KT1081021

Pulse Sequence: s2pu1  
UNITYplus-400 "unity400"  
Date: Oct 22 2019  
Solvent: CDCl<sub>3</sub>  
Ambient temperature  
Total 20480 repetitions

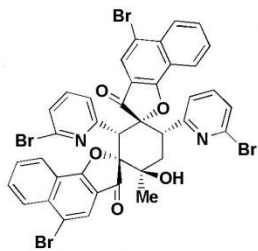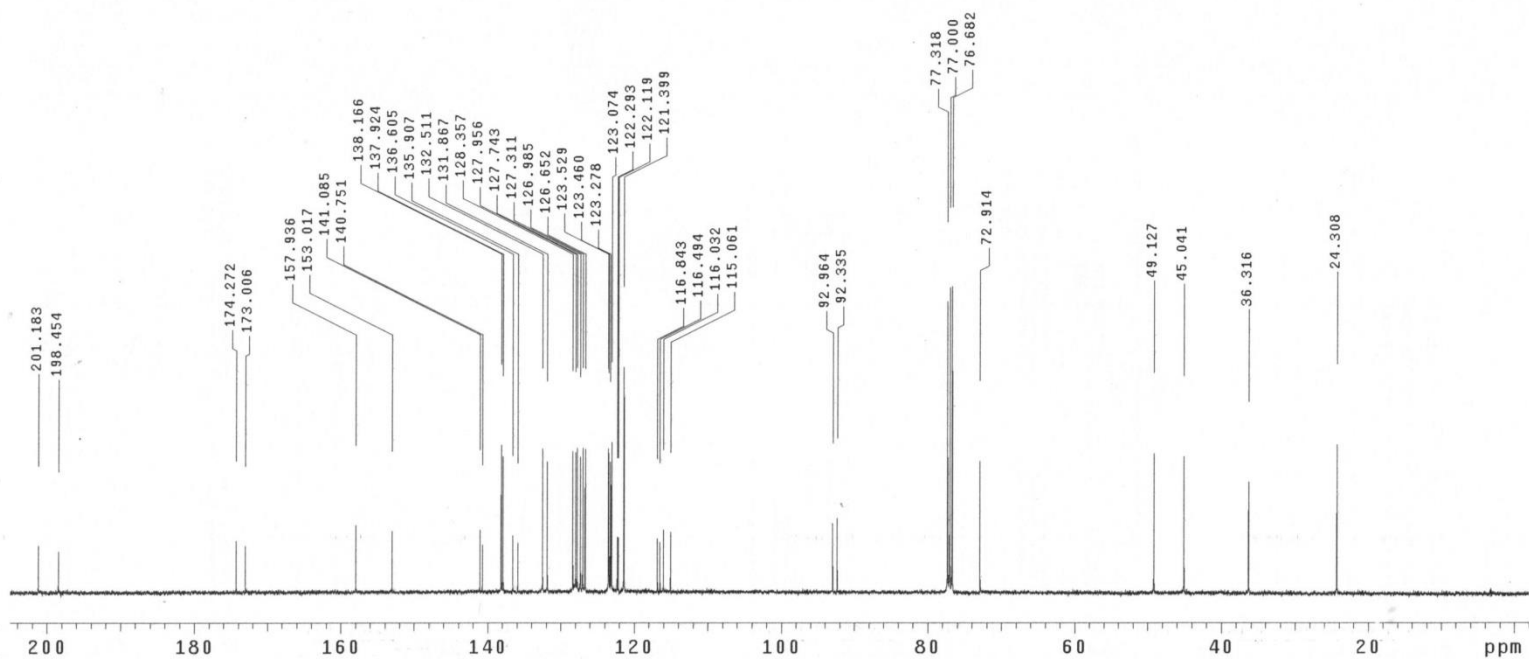

# Compound 3h (<sup>1</sup>H-NMR spectral data)

KT1080826

Pulse Sequence: s2pu1  
UNITYplus-400 "unity400"  
Date: Aug 30 2019  
Solvent: CDCl<sub>3</sub>  
Ambient temperature  
Total 32 repetitions

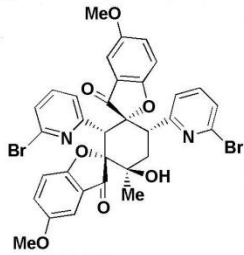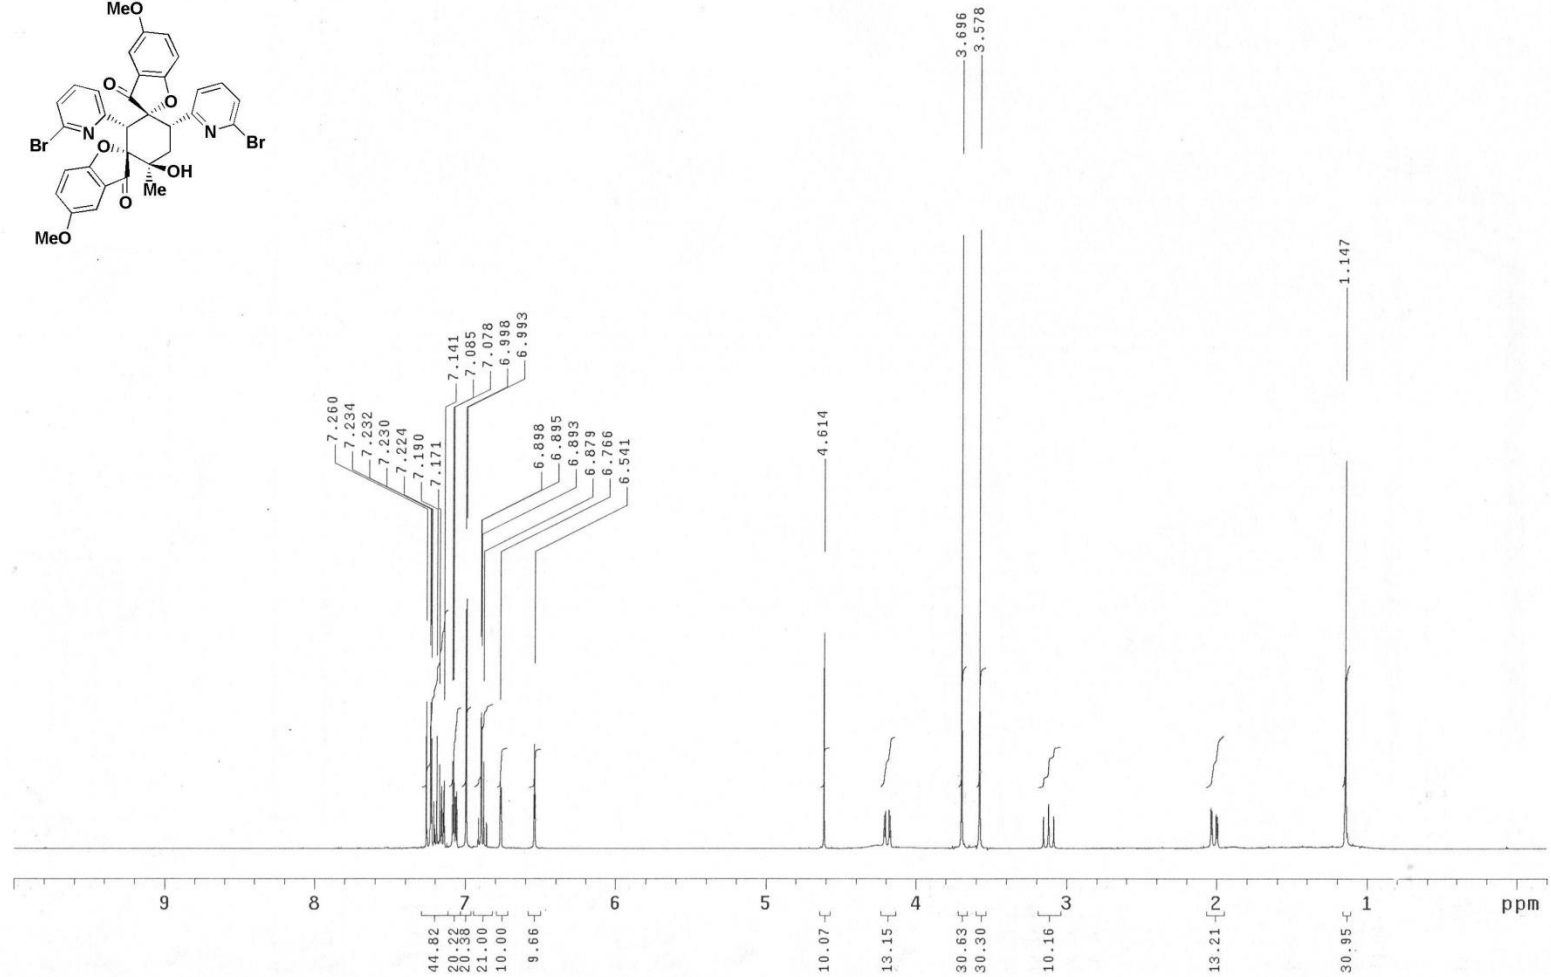



# Compound 3h (<sup>13</sup>C-NMR spectral data)

KT1080826

Pulse Sequence: s2pu1  
UNITYplus-400 "unity400"  
Date: Aug 30 2019  
Solvent: CDCl<sub>3</sub>  
Ambient temperature  
Total 2016 repetitions

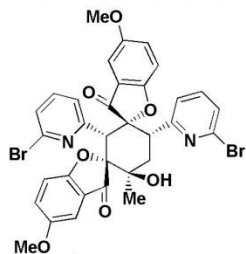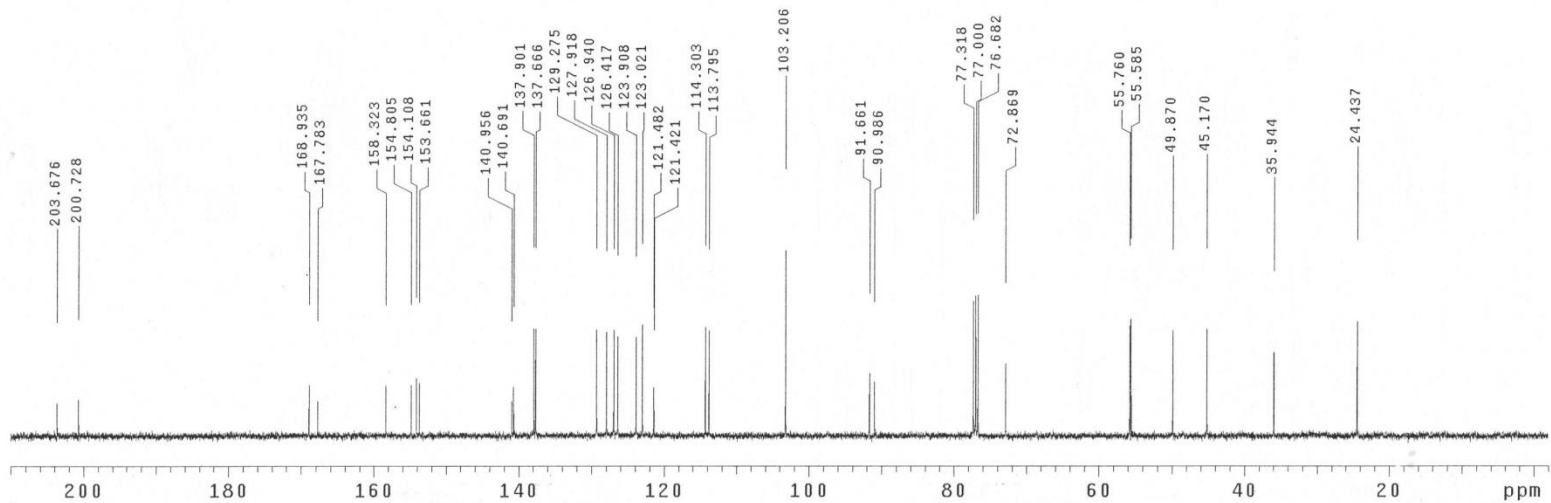

# Compound 3i (<sup>1</sup>H-NMR spectral data)

KT1080917  
Pulse Sequence: s2pu1  
UNITYplus-400 "unity400"  
Date: Sep 18 2019  
Solvent: CDCl3  
Ambient temperature  
Total 32 repetitions

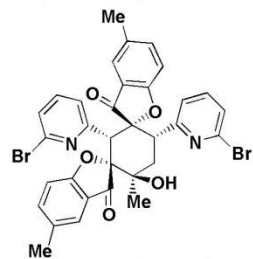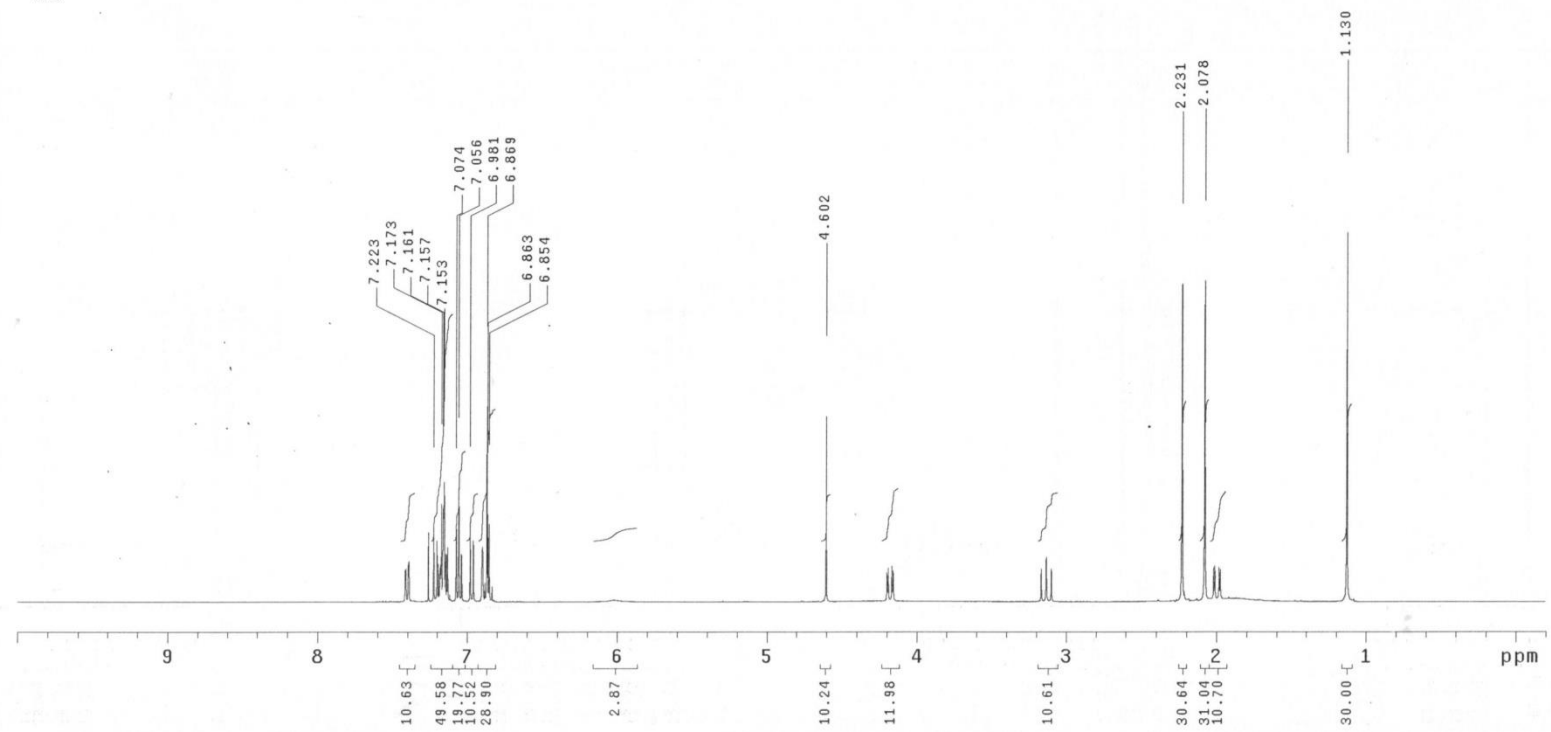

# Compound 3i (<sup>13</sup>C-NMR spectral data)

KT1080917

Pulse Sequence: s2pu1  
UNITYplus-400 "unity400"  
Date: Sep 18 2019  
Solvent: CDCl<sub>3</sub>  
Ambient temperature  
Total 2048 repetitions

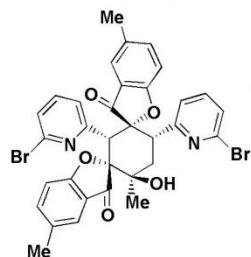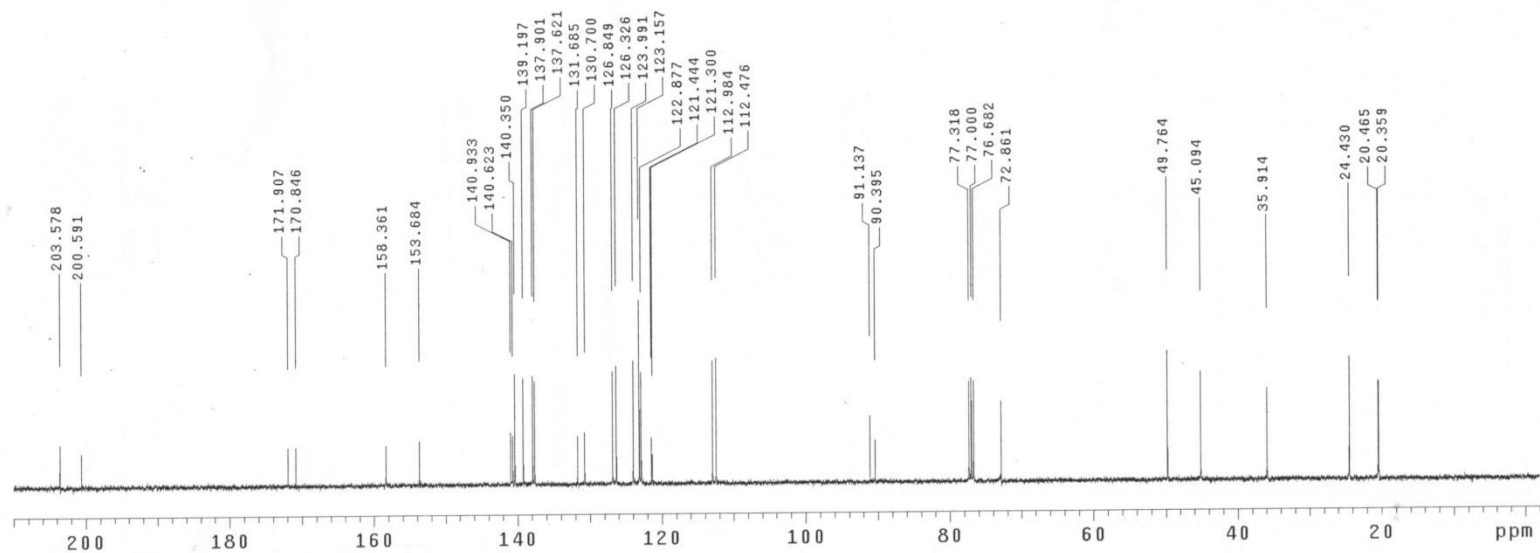



# Compound 3j (<sup>13</sup>C-NMR spectral data)

T1PhP

Pulse Sequence: s2pu1  
UNITYplus-400 "unity400"  
Date: Feb 25 2019  
Solvent: CDCl<sub>3</sub>  
Ambient temperature  
Total 3008 repetitions

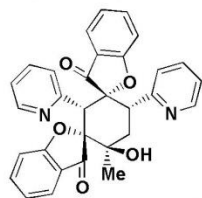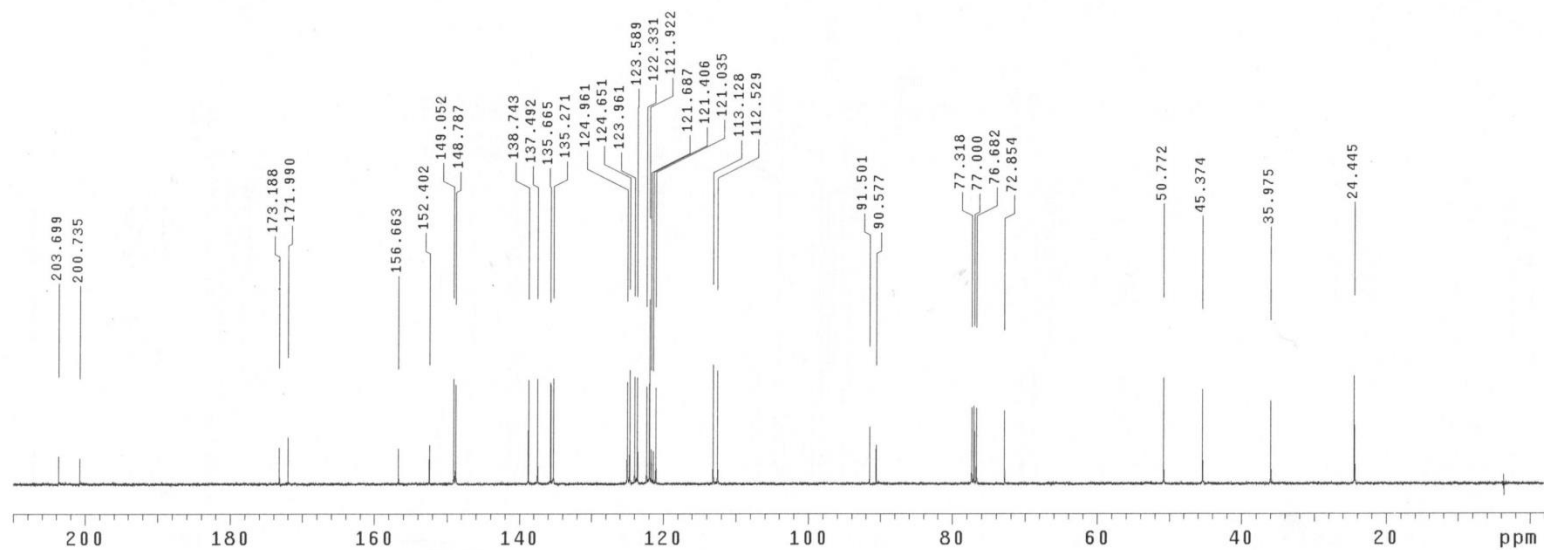

# Compound 3k (<sup>1</sup>H-NMR spectral data)

KT1080719

Pulse Sequence: s2pu1  
UNITYplus-400 "unity400"  
Date: Oct 31 2019  
Solvent: CDC13  
Ambient temperature  
Total 160 repetitions

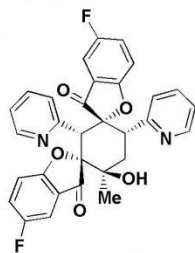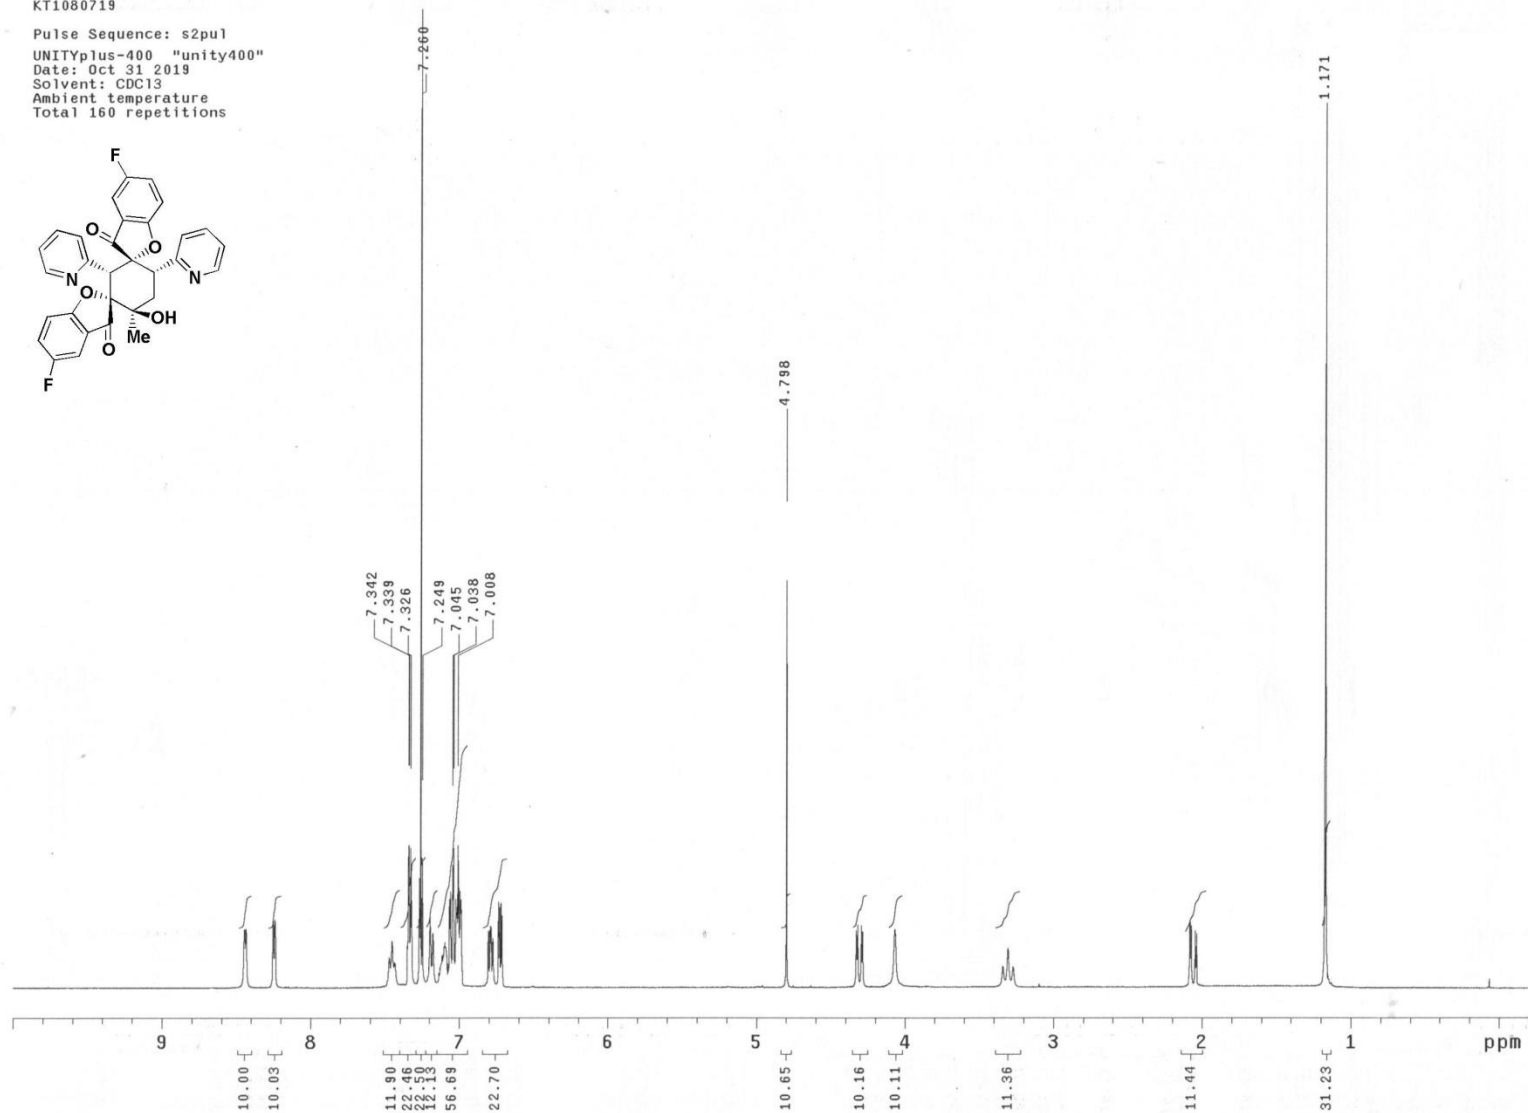

# Compound 3k (<sup>13</sup>C-NMR spectral data)

KT1080719

Pulse Sequence: s2pu1  
UNITYplus-400 "unity400"  
Date: Oct 31 2019  
Solvent: CDCl<sub>3</sub>  
Ambient temperature  
Total 37616 repetitions

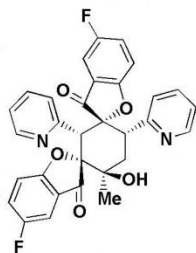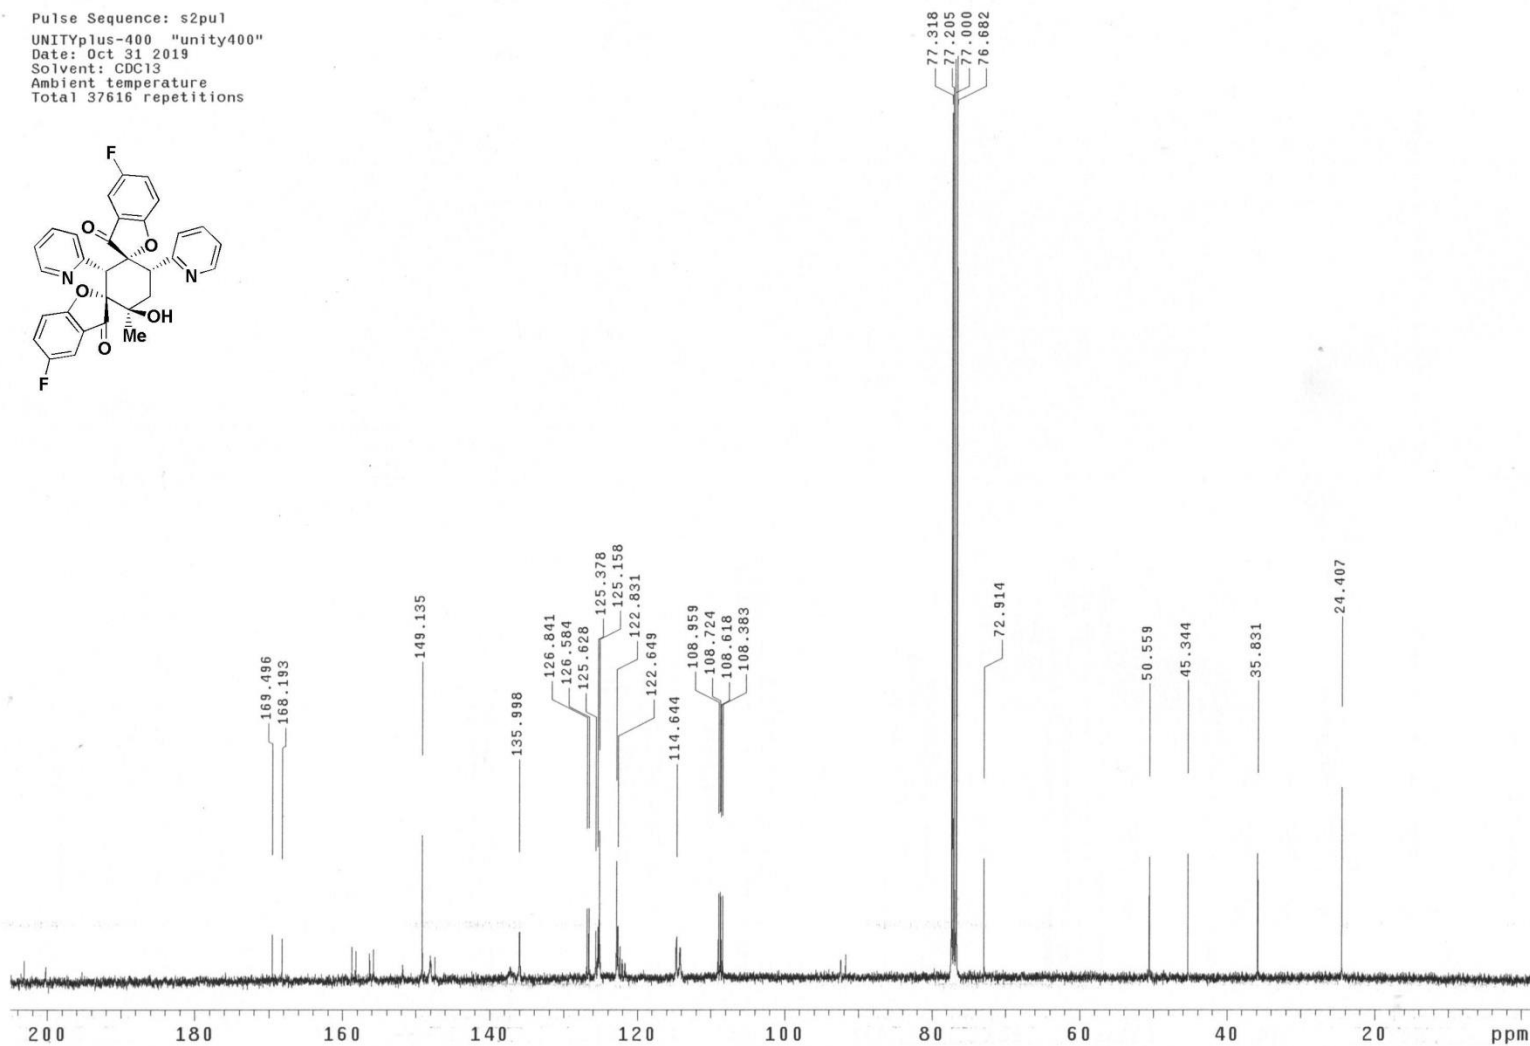

# Compound 3I (<sup>1</sup>H-NMR spectral data)

KT1080711

Pulse Sequence: s2pu1  
UNITYplus-400 "unity400"  
Date: Aug 29 2019  
Solvent: CDCl3  
Ambient temperature  
Total 32 repetitions

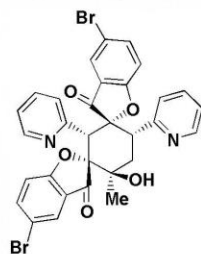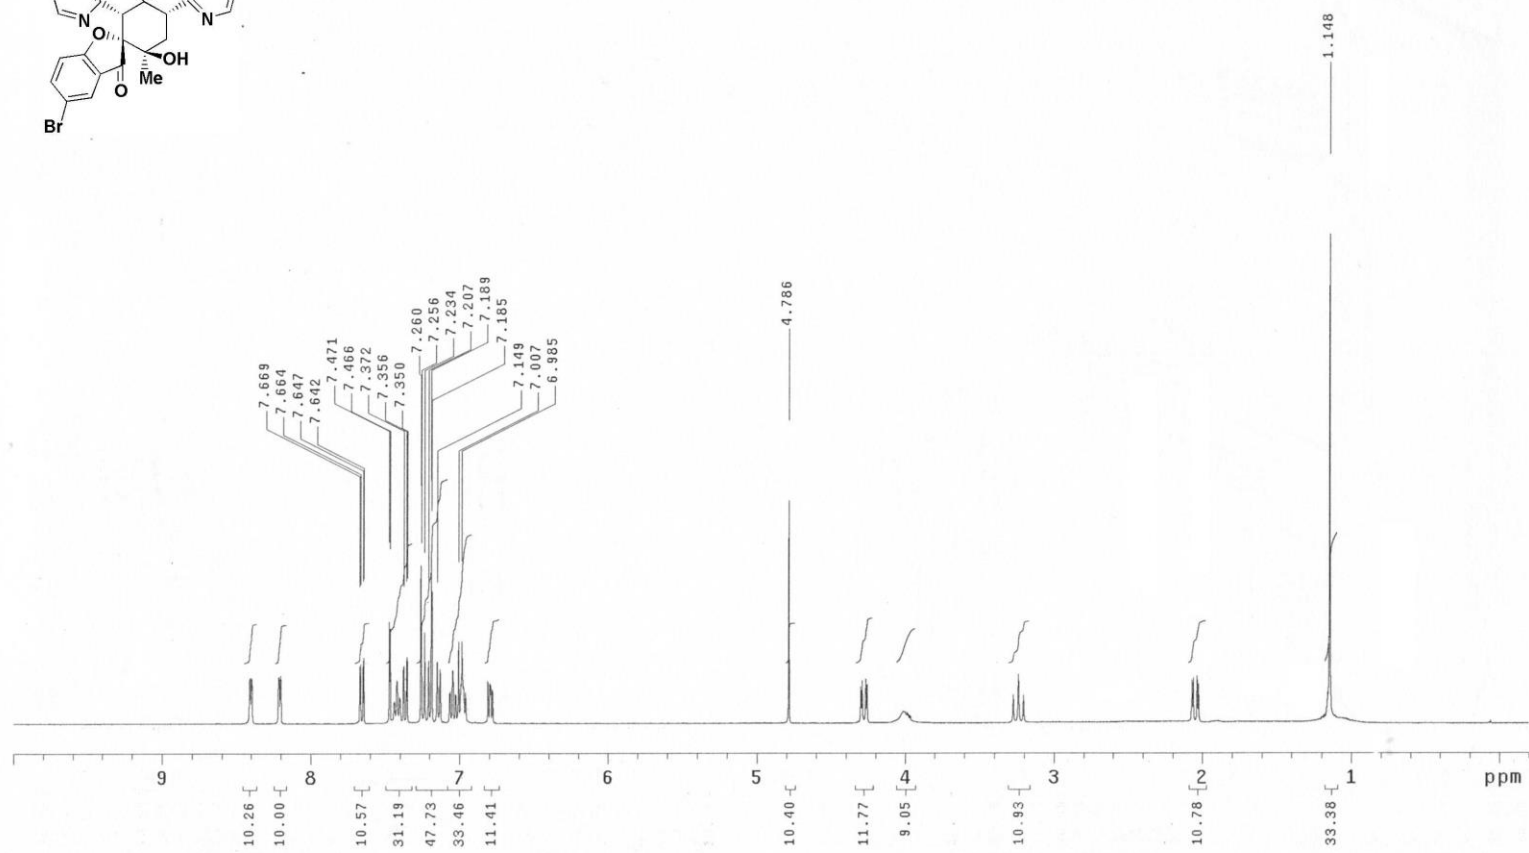



# Compound 3l (<sup>13</sup>C-NMR spectral data)

KT1080711

Pulse Sequence: s2pu1  
UNITYplus-400 "unity400"  
Date: Aug 29 2019  
Solvent: CDC13  
Ambient temperature  
Total 3136 repetitions

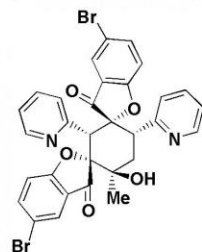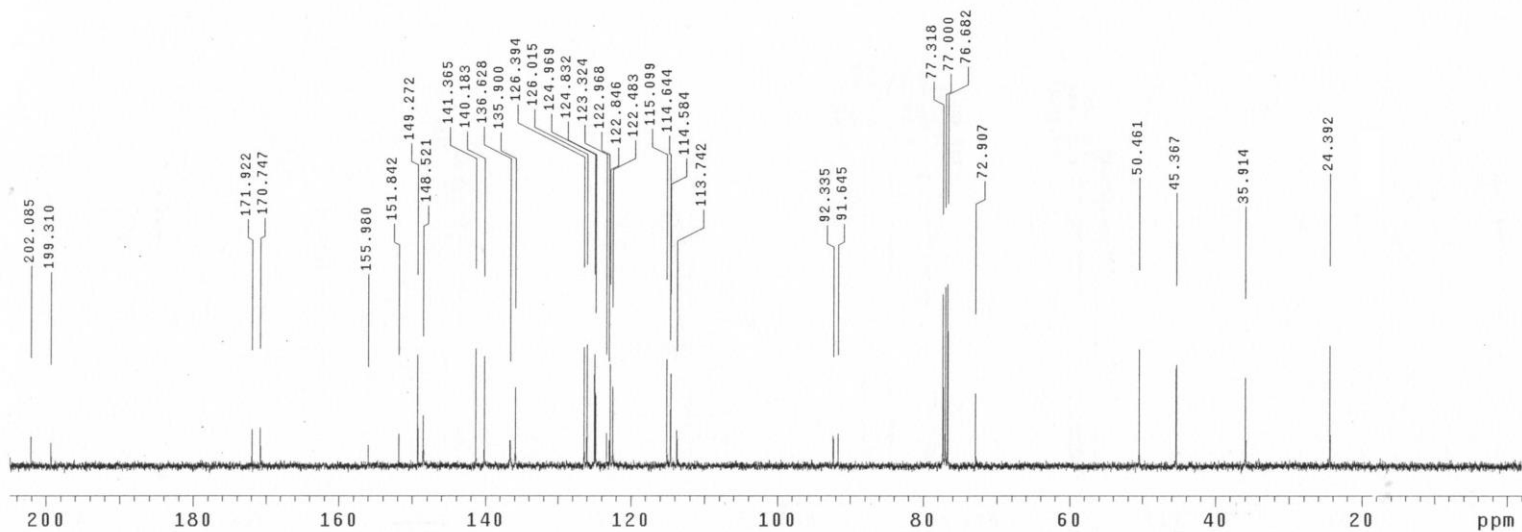

# Compound 3m (<sup>1</sup>H-NMR spectral data)

KT1080729

Pulse Sequence: s2pu1  
UNITYplus-400 "unity400"  
Date: Sep 2 2019  
Solvent: CDCl<sub>3</sub>  
Ambient temperature  
Total 276 repetitions

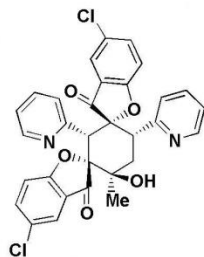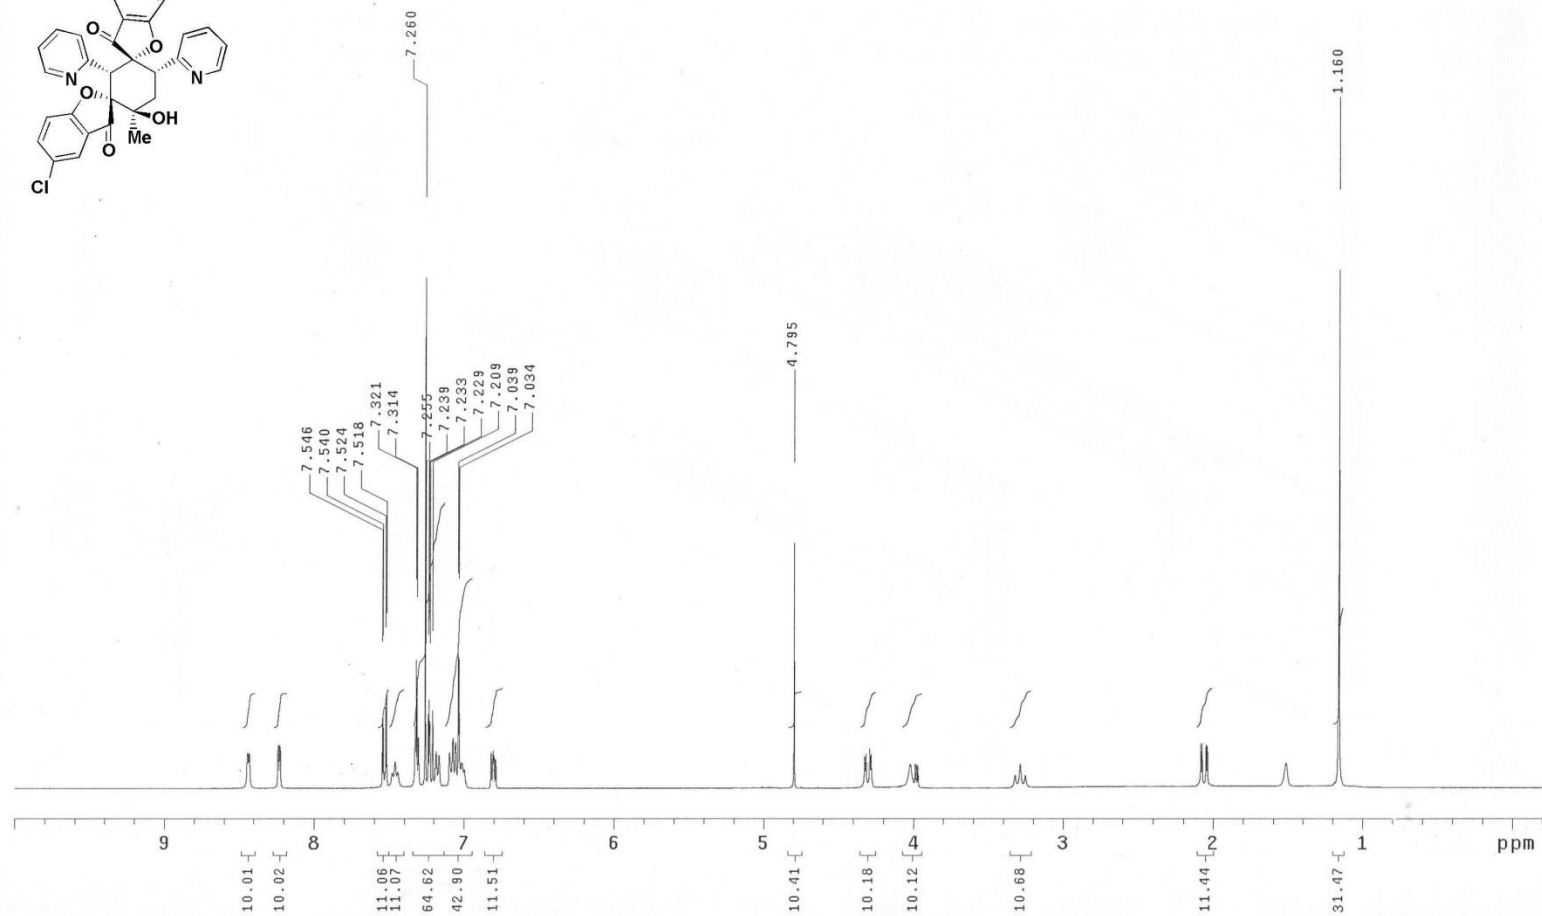

# Compound 3m (<sup>13</sup>C-NMR spectral data)

KT1080729

Pulse Sequence: s2pu1  
UNITYplus-400 "unity400"  
Date: Sep 2 2019  
Solvent: CDCl<sub>3</sub>  
Ambient temperature  
Total 32000 repetitions

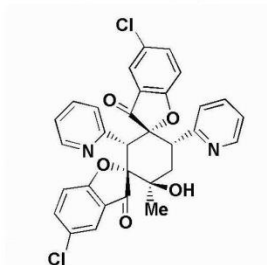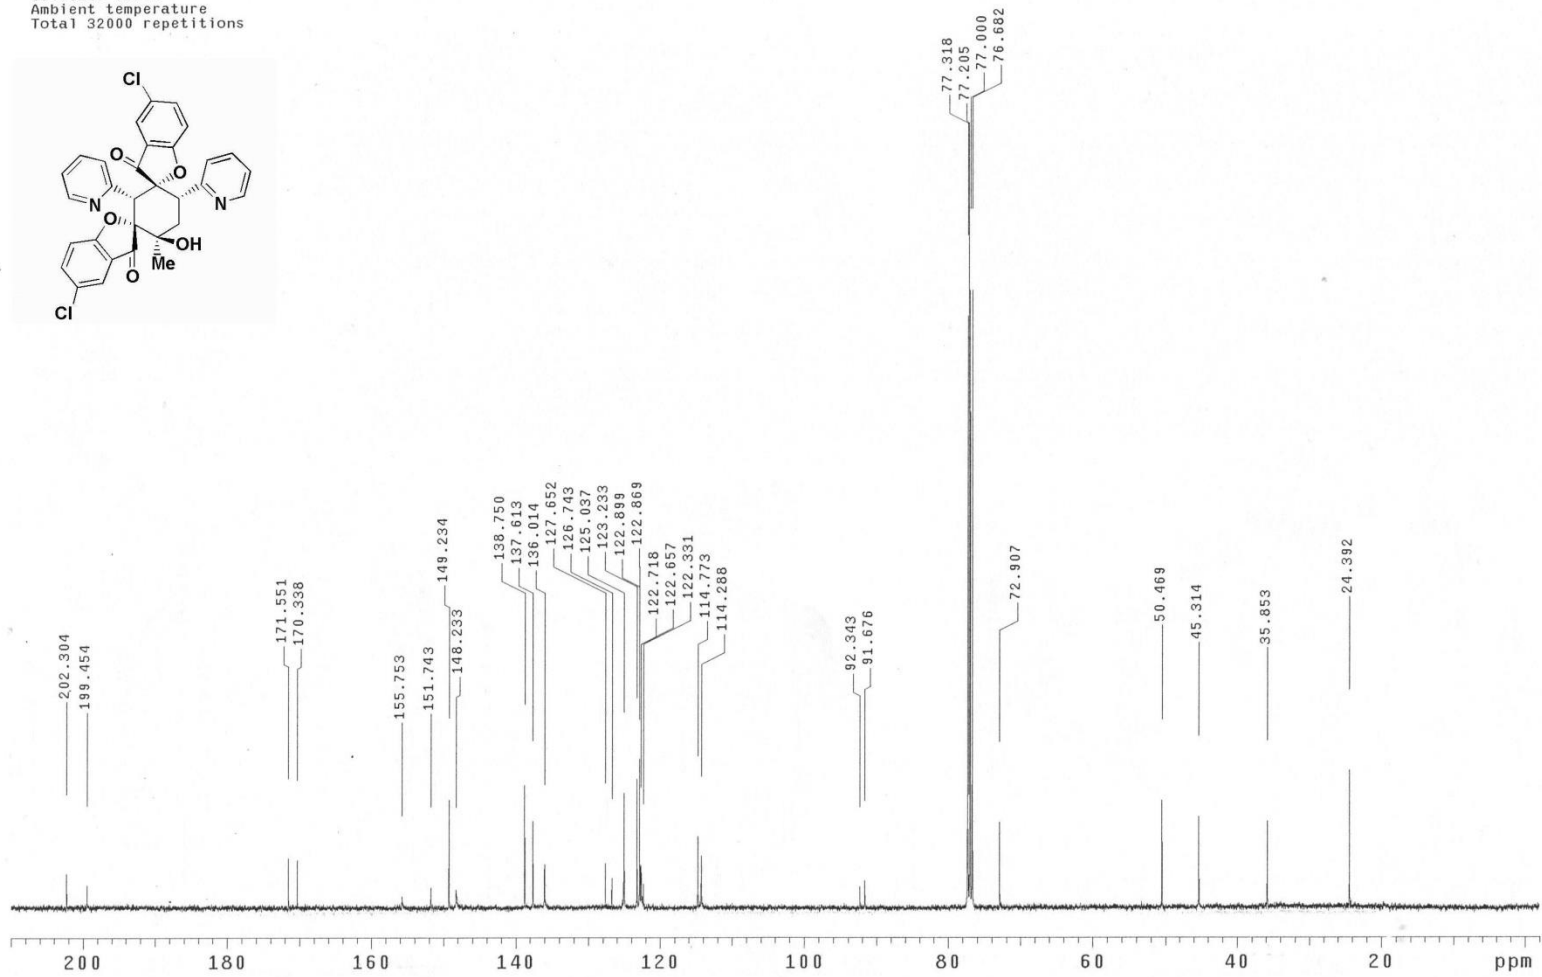

# Compound 3n (<sup>1</sup>H-NMR spectral data)

KT1080722

Pulse Sequence: s2pu1  
UNITYplus-400 "unity400"  
Date: Aug 12 2019  
Solvent: CDCl3  
Ambient temperature  
Total 64 repetitions

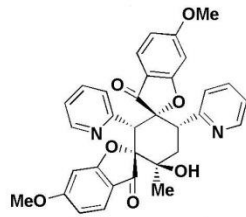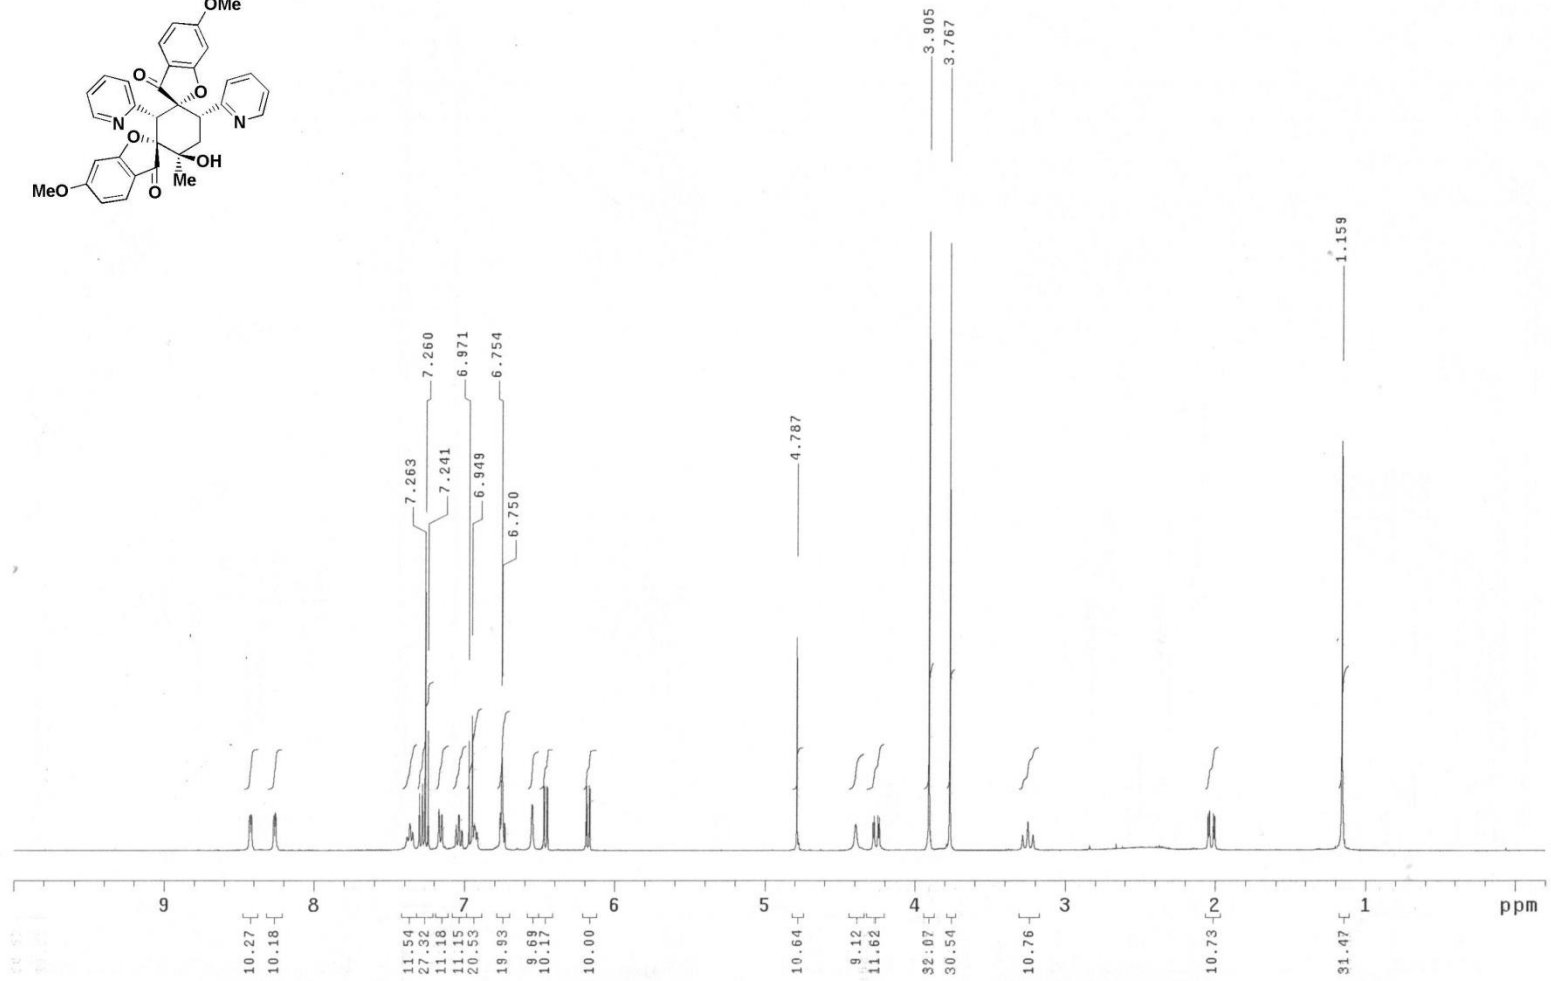

# Compound 3n (<sup>13</sup>C-NMR spectral data)

KT1080722

Pulse Sequence: s2pu1  
UNITYplus-400 "unity400"  
Date: Aug 12 2019  
Solvent: CDCl<sub>3</sub>  
Ambient temperature  
Total 6320 repetitions

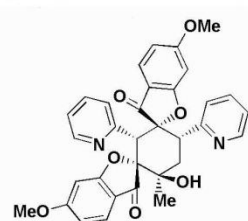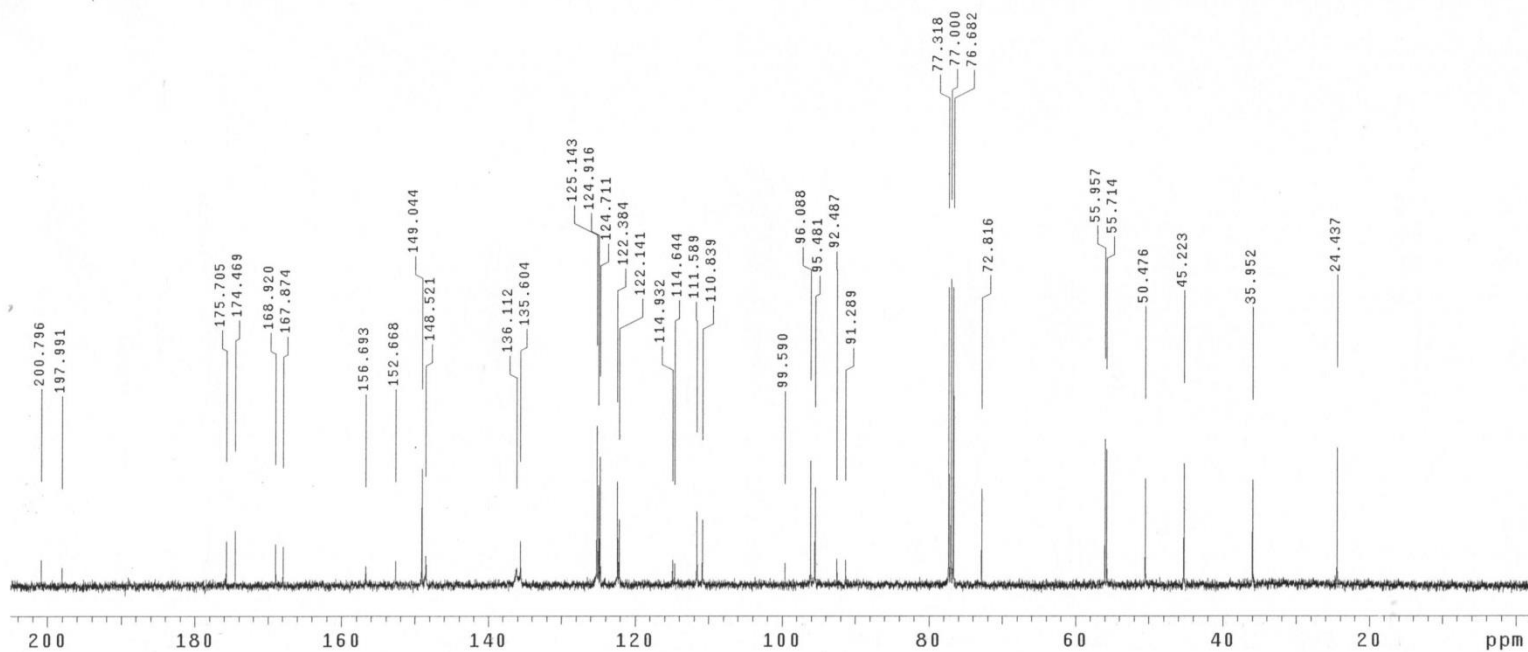

# Compound 3o (<sup>1</sup>H-NMR spectral data)

KT1080814

Pulse Sequence: s2pu1  
UNITYplus-400 "unity400"  
Date: Aug 15 2019  
Solvent: CDCl<sub>3</sub>  
Ambient temperature  
Total 32 repetitions

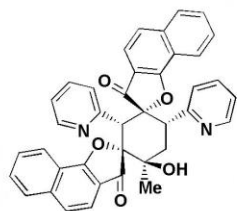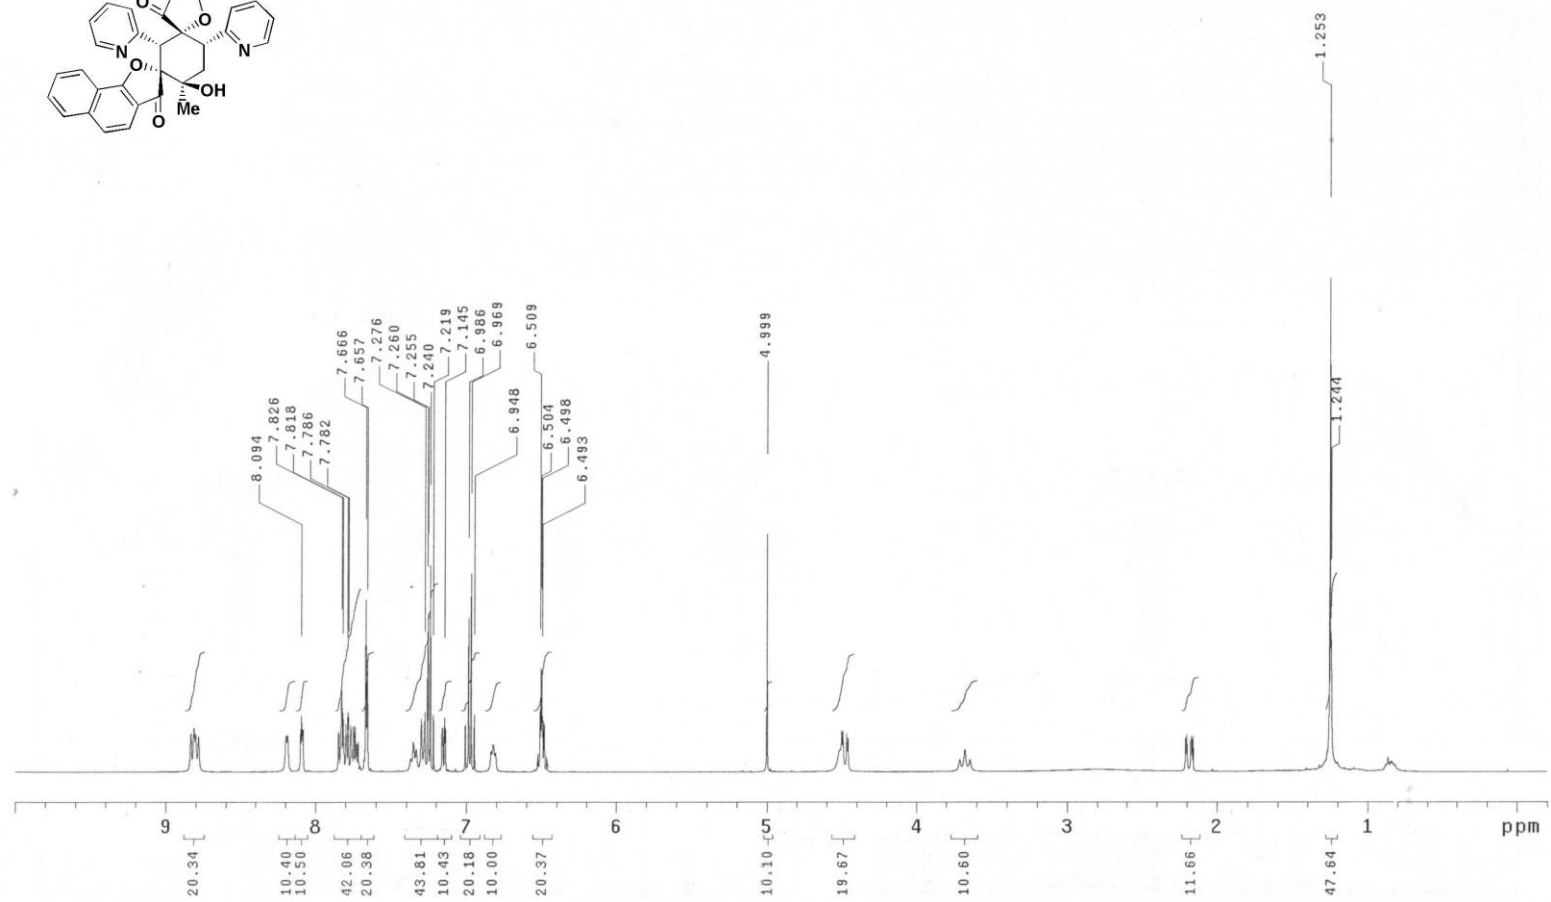

# Compound 3o (<sup>13</sup>C-NMR spectral data)

KT1080814

Pulse Sequence: s2pu1  
UNITYplus-400 "unity400"  
Date: Aug 15 2019  
Solvent: CDCl<sub>3</sub>  
Ambient temperature  
Total 2176 repetitions

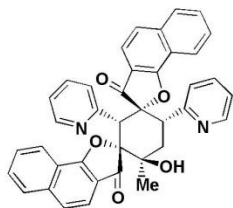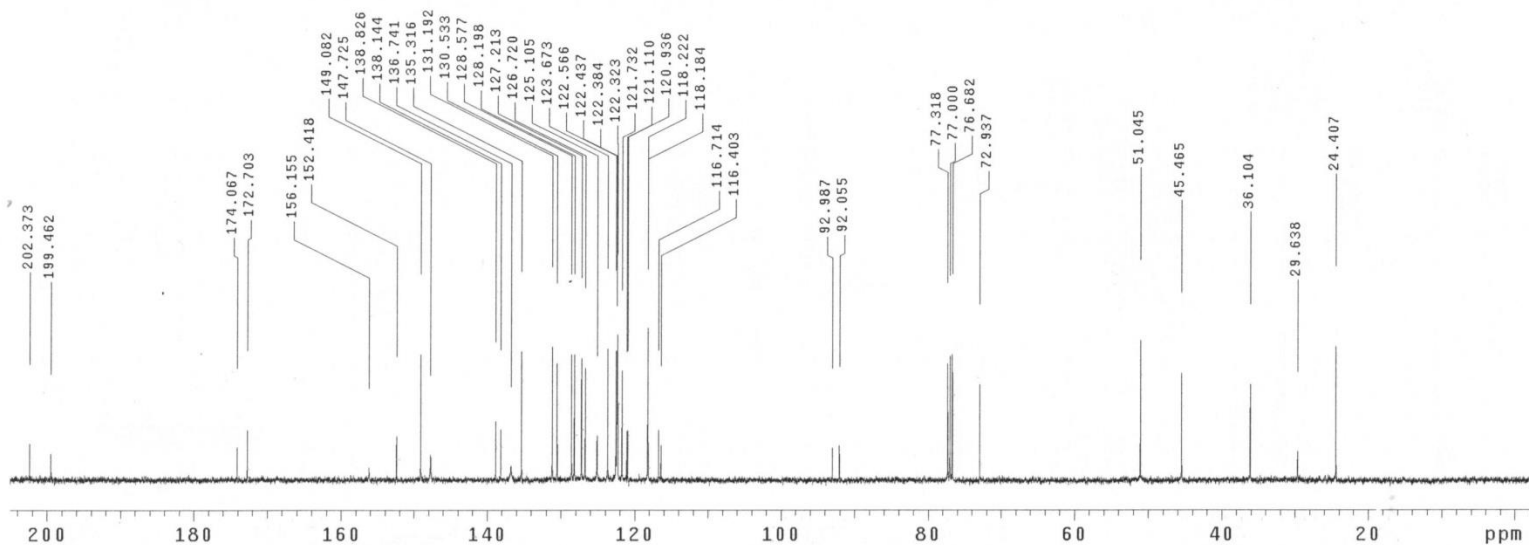

# Compound 3p (<sup>1</sup>H-NMR spectral data)

KT1080904

Pulse Sequence: s2pu1  
UNITYplus-400 "unity400"  
Date: Sep 4 2019  
Solvent: CDCl3  
Ambient temperature  
Total 160 repetitions

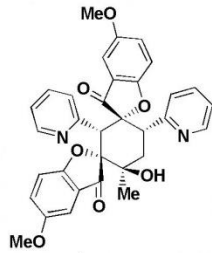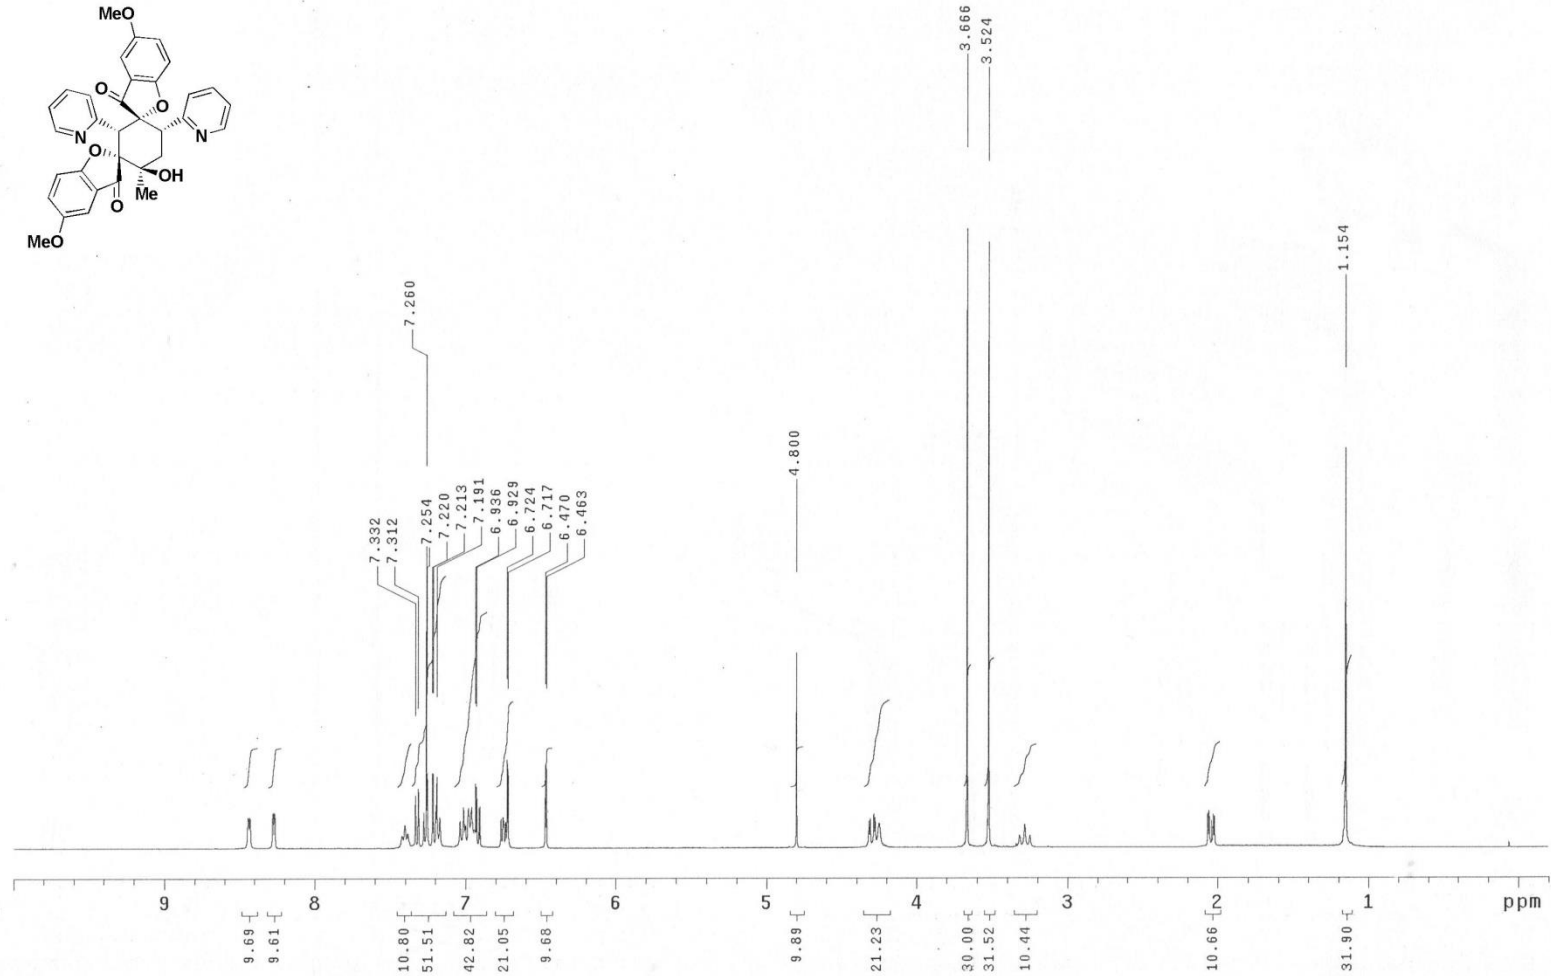





# Compound 3q (<sup>1</sup>H-NMR spectral data)

KT1080715

Pulse Sequence: s2pu1  
UNITYplus-400 "unity400"  
Date: Jul 17 2019  
Solvent: CDCl<sub>3</sub>  
Ambient temperature  
Total 160 repetitions

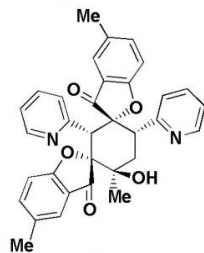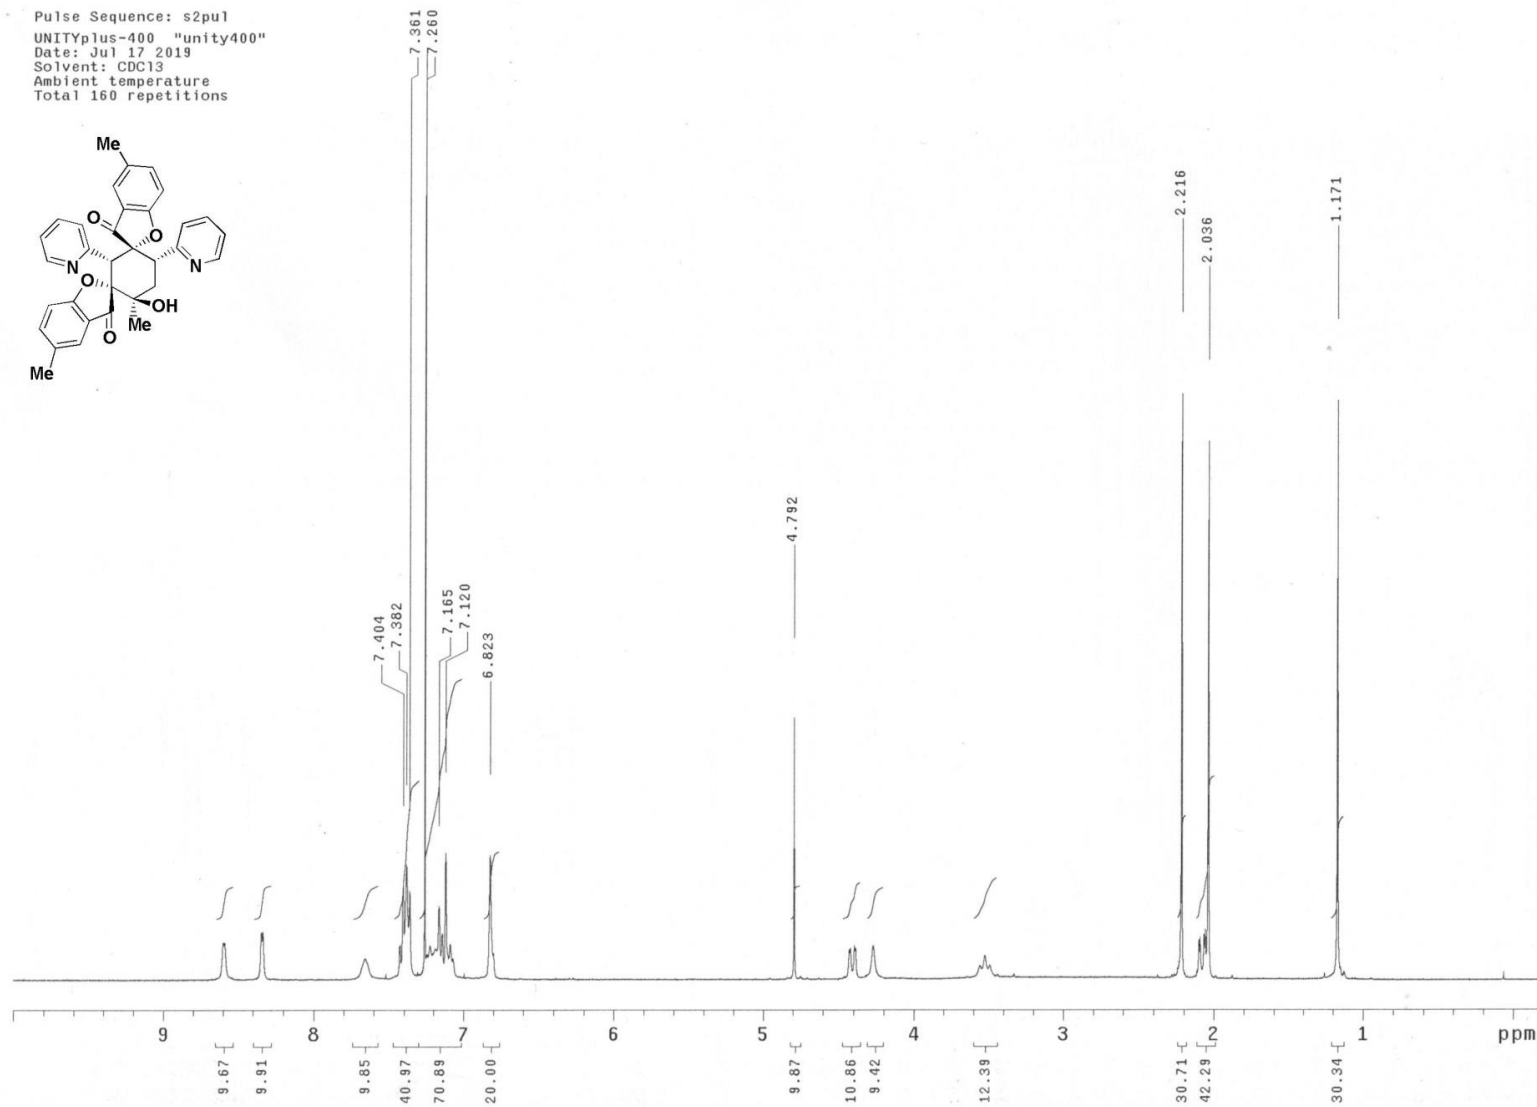

# Compound 3q (<sup>13</sup>C-NMR spectral data)

KT1080715

Pulse Sequence: s2pu1  
UNITYplus-400 "unity400"  
Date: Jul 17 2019  
Solvent: CDCl<sub>3</sub>  
Ambient temperature  
Total 31584 repetitions

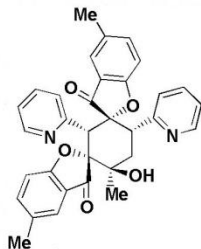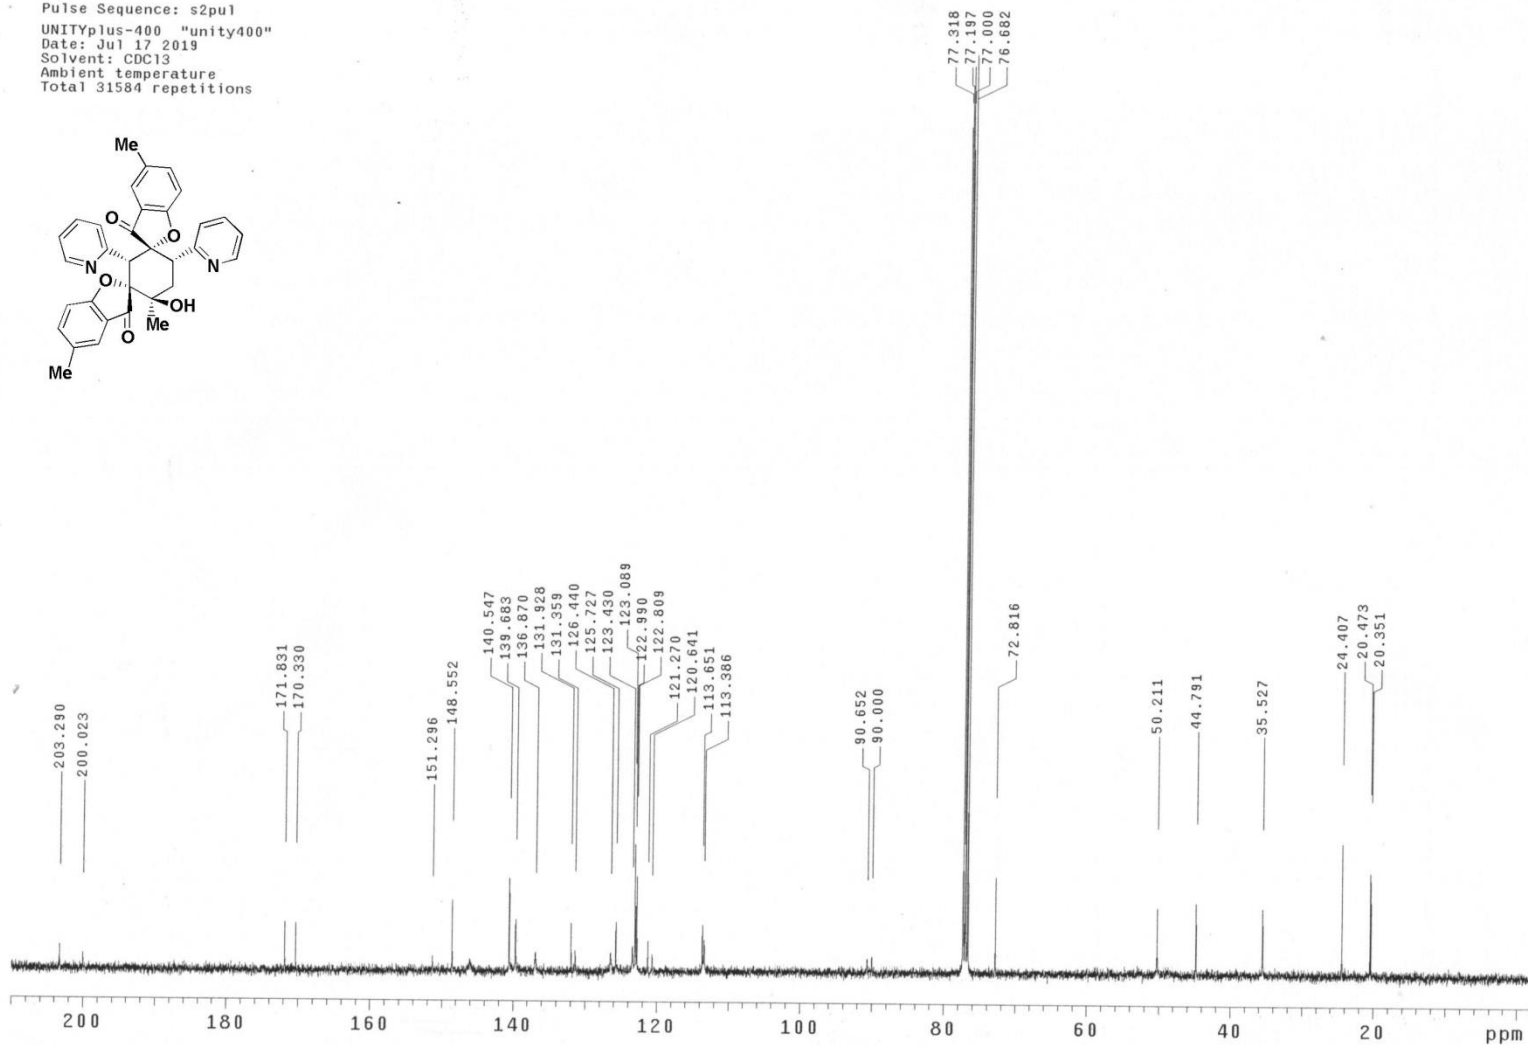

# Compound 3r (<sup>1</sup>H-NMR spectral data)

KT1080611

Pulse Sequence: s2pu1  
UNITYplus-400 "unity400"  
Date: Jun 17 2019  
Solvent: CDCl<sub>3</sub>  
Ambient temperature  
Total 32 repetitions

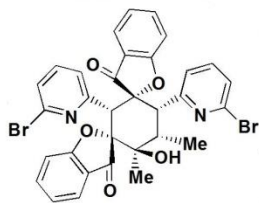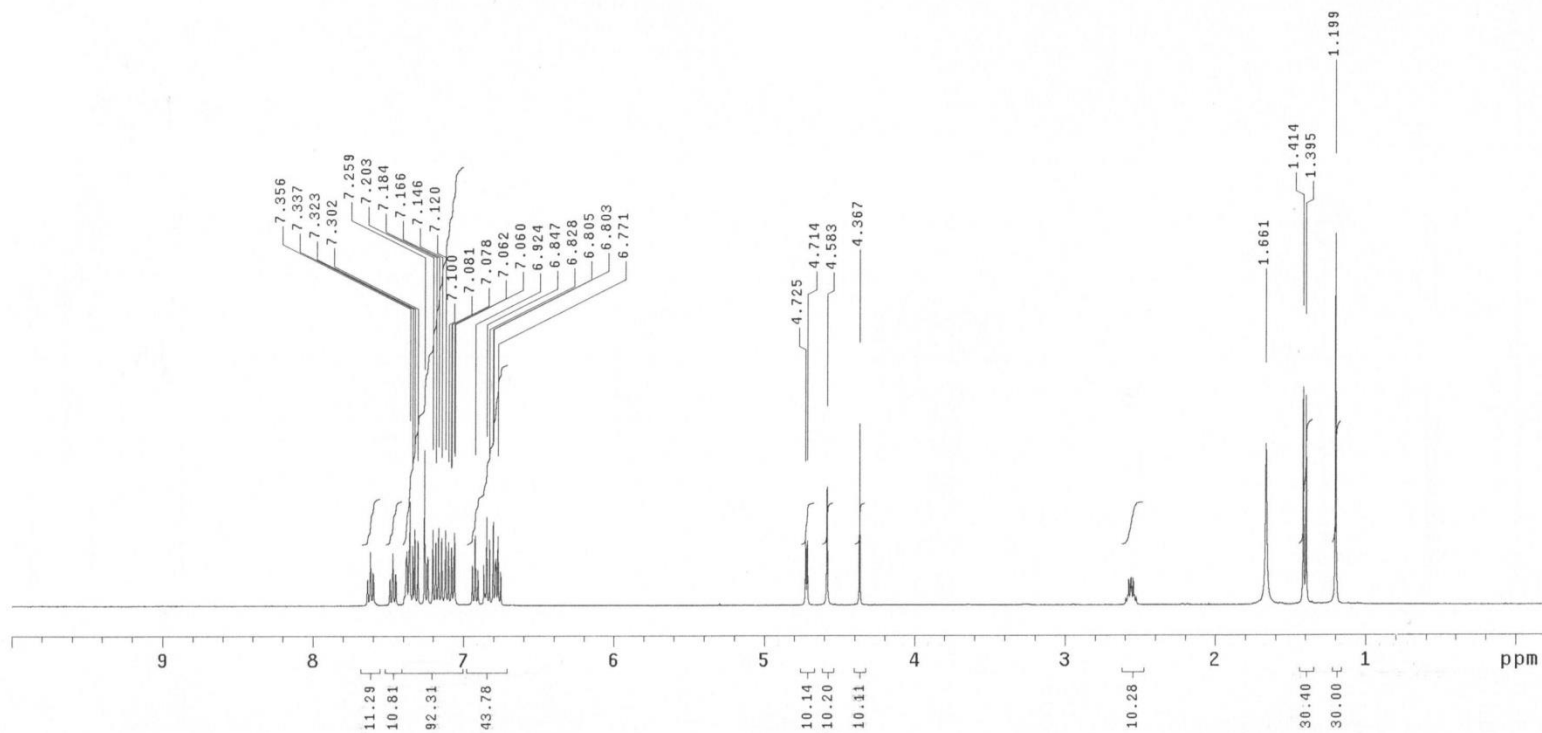



# Compound 3s (<sup>1</sup>H-NMR spectral data)

KT1080906

Pulse Sequence: s2pu1  
 UNITYplus-400 "unity400"  
 Date: Sep 6 2019  
 Solvent: CDCl<sub>3</sub>  
 Ambient temperature  
 Total 32 repetitions

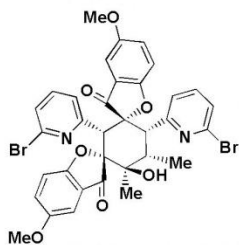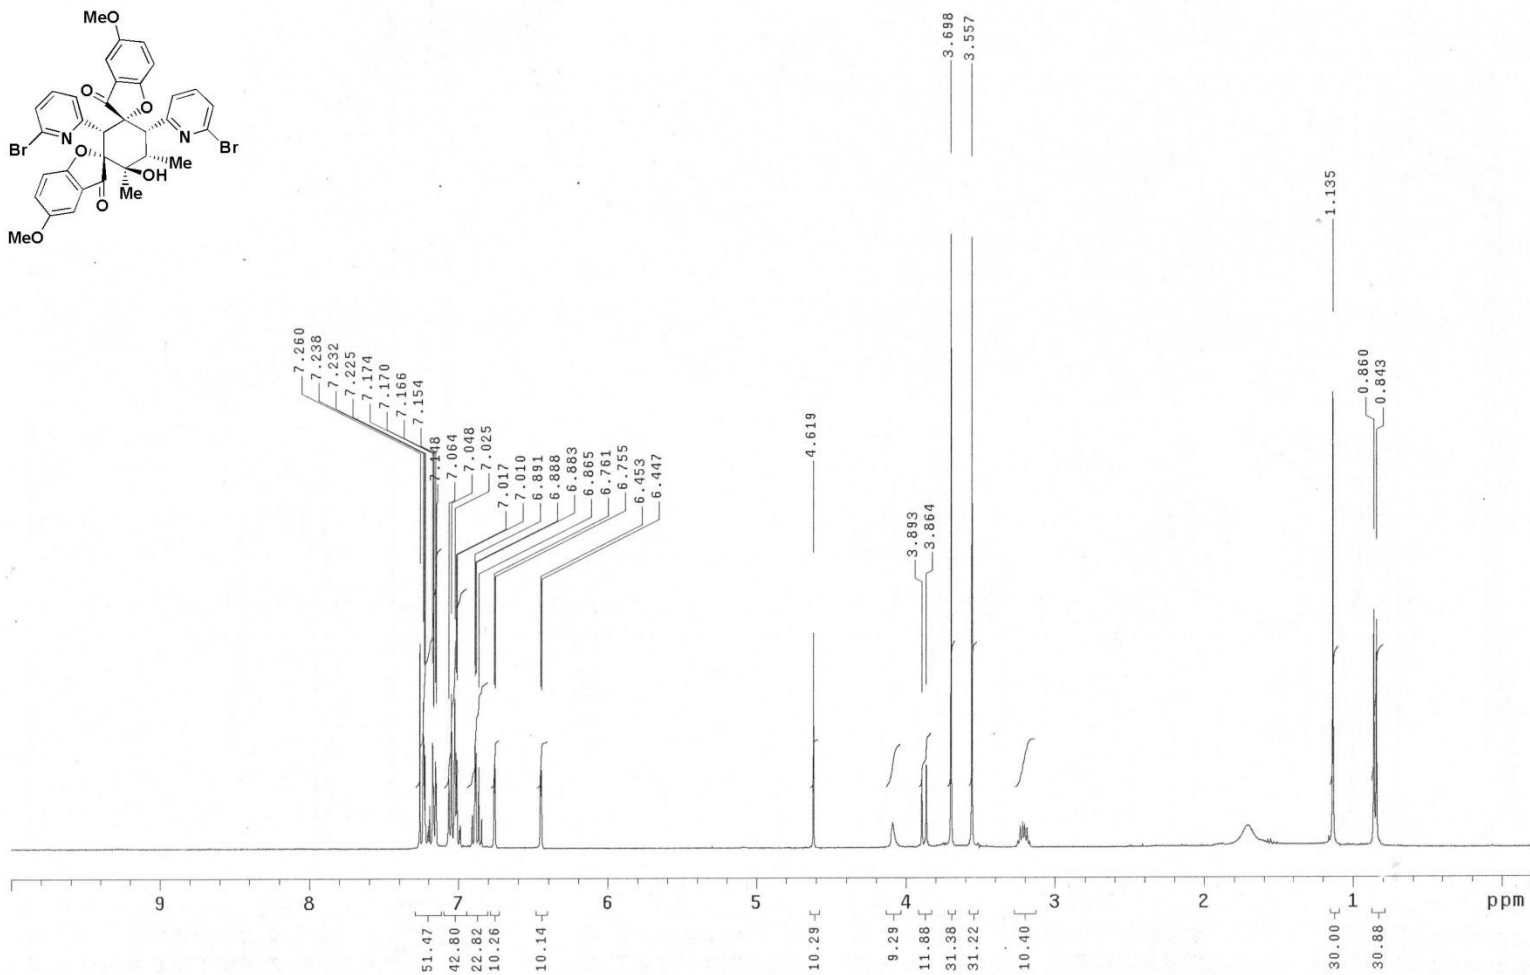

# Compound 3s (<sup>13</sup>C-NMR spectral data)

KT1080906

Pulse Sequence: s2pu1  
UNITYplus-400 "unity400"  
Date: Sep 6 2019  
Solvent: CDCl3  
Ambient temperature  
Total 4400 repetitions

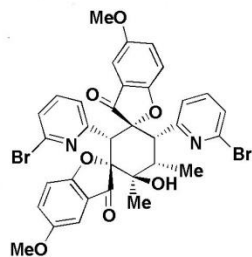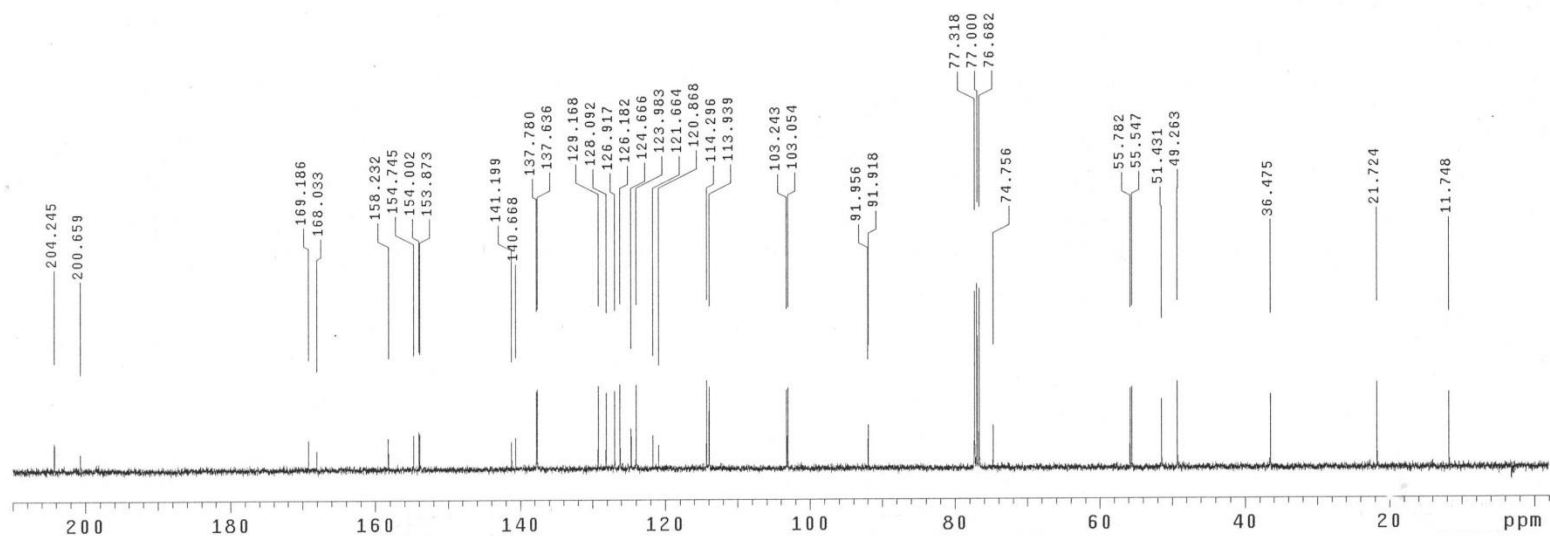

# Compound 3t (<sup>1</sup>H-NMR spectral data)

KT1080912

Pulse Sequence: s2pu1

UNITYplus-400 "unity400"

Date: Sep 16 2019

Solvent: CDCl<sub>3</sub>

Ambient temperature

Total 64 repetitions

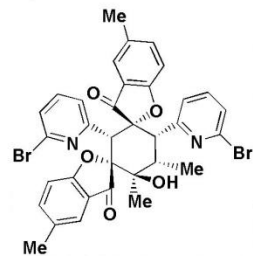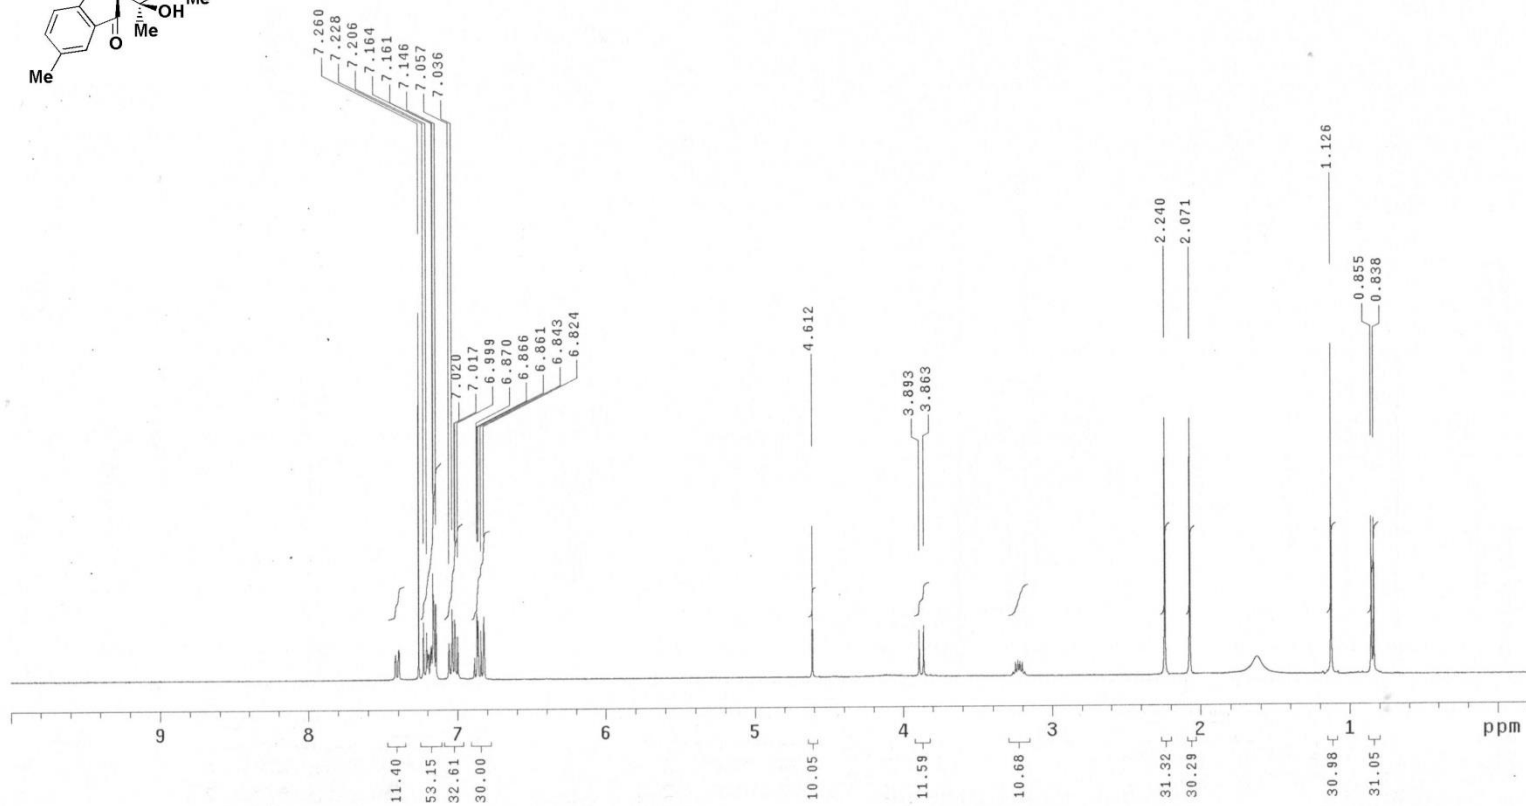



# Compound 3t (<sup>13</sup>C-NMR spectral data)

KT1080912

Pulse Sequence: s2pu1  
UNITYplus-400 "unity400"  
Date: Sep 16 2019  
Solvent: CDCl<sub>3</sub>  
Ambient temperature  
Total 8640 repetitions

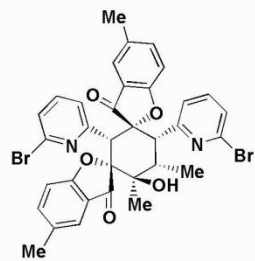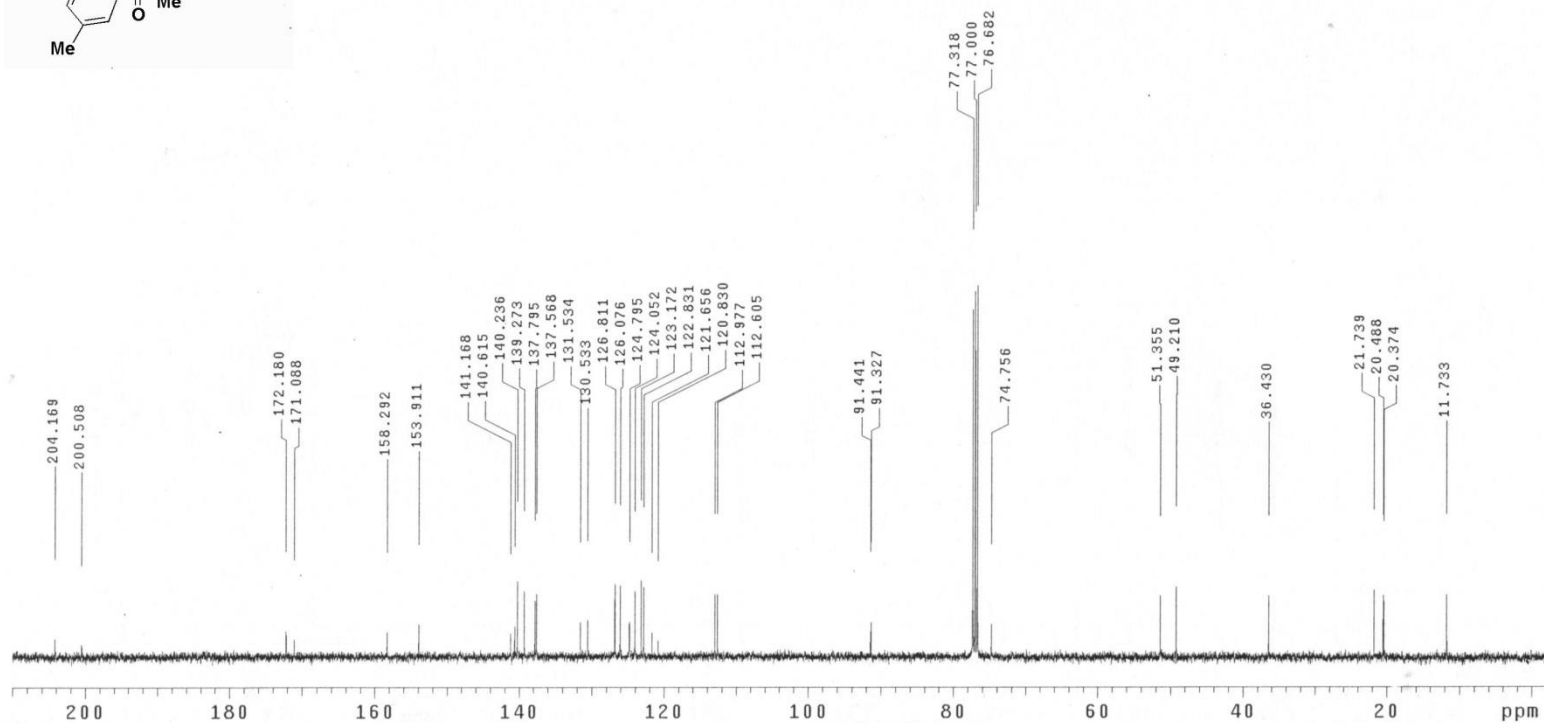

# Compound 3u (<sup>1</sup>H-NMR spectral data)

KT1080916

Pulse Sequence: s2pu1  
UNITYplus-400 "unity400"  
Date: Sep 17 2019  
Solvent: CDCl<sub>3</sub>  
Ambient temperature  
Total 64 repetitions

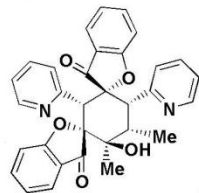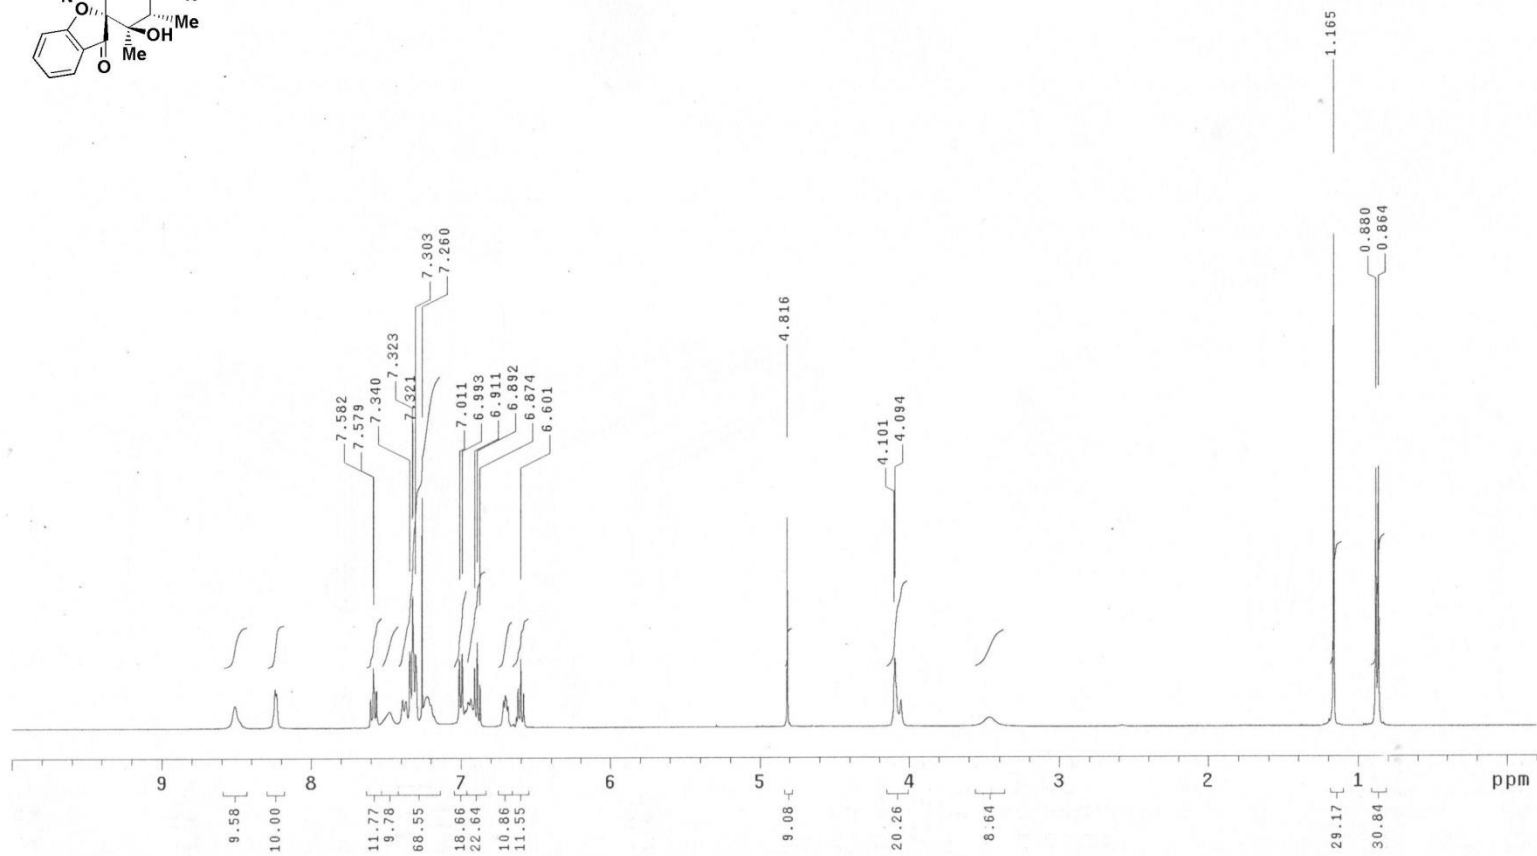

# Compound 3u (<sup>13</sup>C-NMR spectral data)

KT1080916

Pulse Sequence: s2pu1  
UNITYplus-400 "unity400"  
Date: Sep 17 2019  
Solvent: CDCl<sub>3</sub>  
Ambient temperature  
Total 7024 repetitions

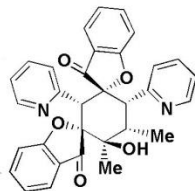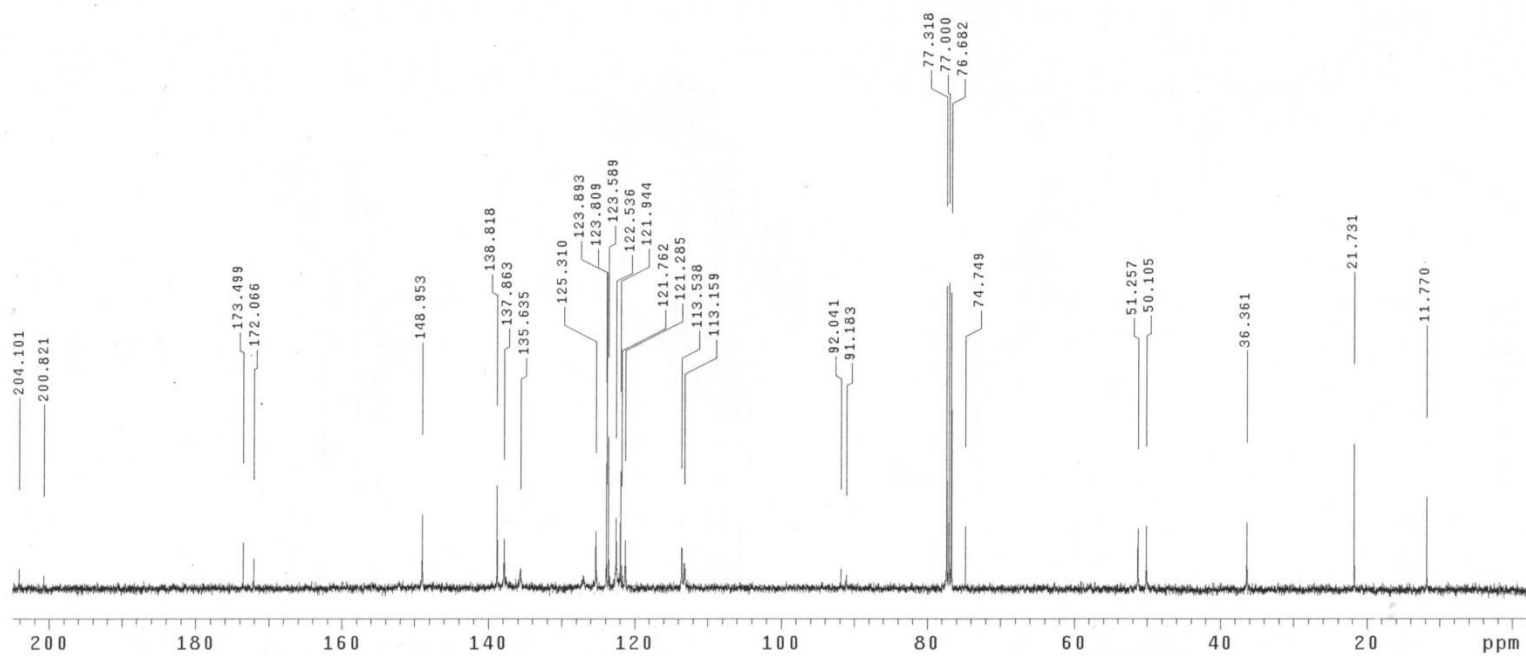

# Compound 3v (<sup>1</sup>H-NMR spectral data)

KT1080724

Pulse Sequence: s2pu1  
UNITYplus-400 "unity400"  
Date: Oct 3 2019  
Solvent: CDCl<sub>3</sub>  
Ambient temperature  
Total 160 repetitions

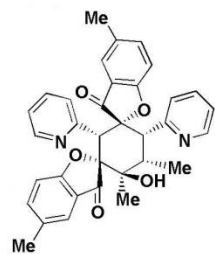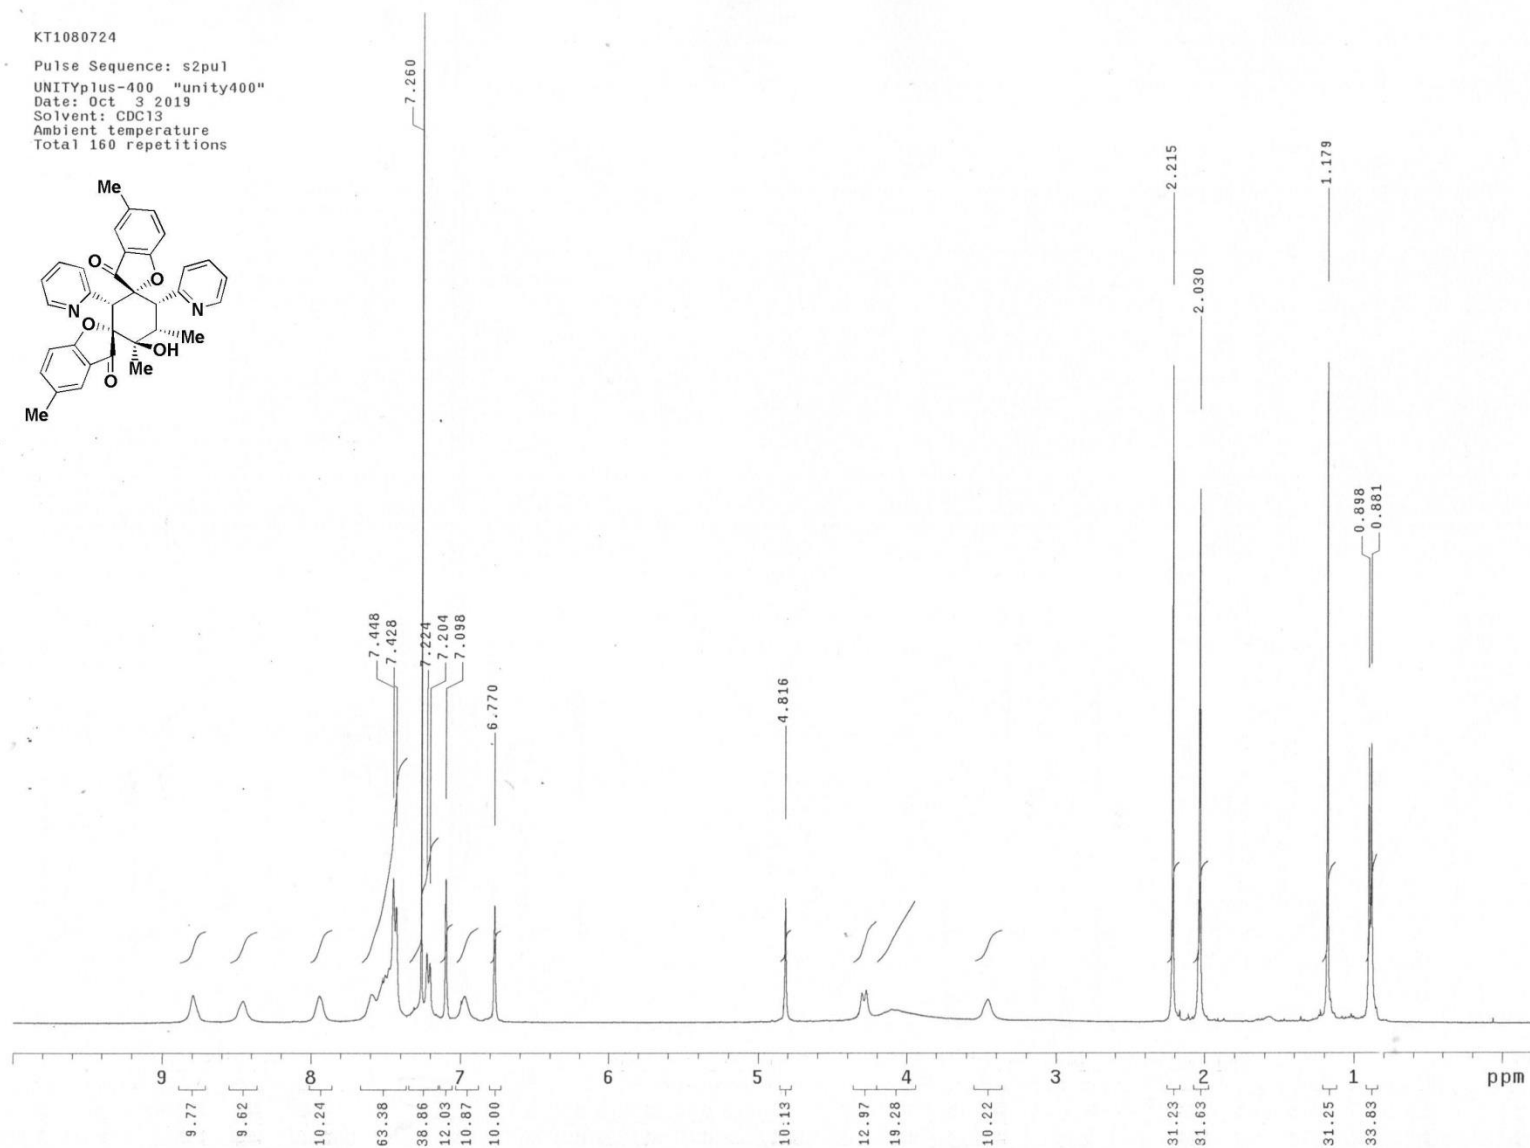

# Compound 3v (<sup>13</sup>C-NMR spectral data)

KT1080724  
Pulse Sequence: s2pul  
UNITYplus-400 "unity400"  
Date: Oct 3 2019  
Solvent: CDCl3  
Ambient temperature  
Total 38816 repetitions

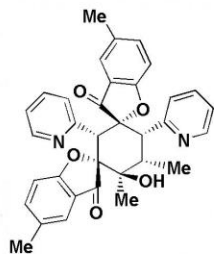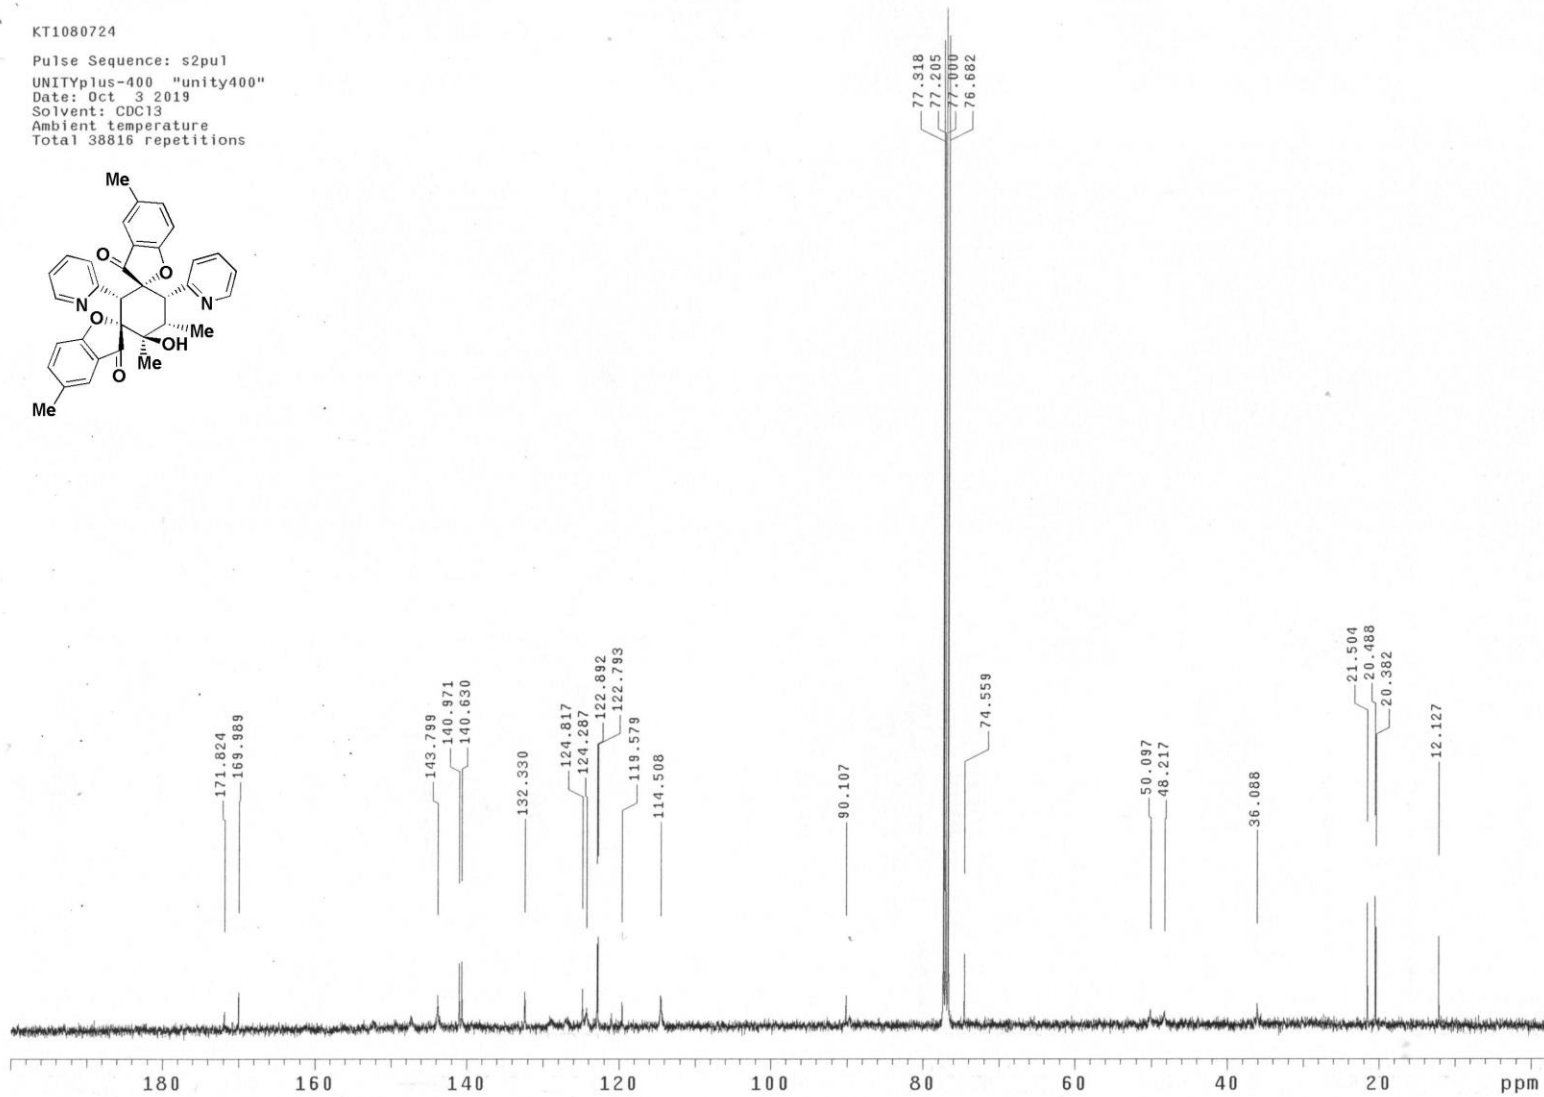

# Compound 3w (<sup>1</sup>H-NMR spectral data)

KTPPrPB

Pulse Sequence: s2pul  
 UNITYplus-400 "unity400"  
 Date: Jun 27 2019  
 Solvent: CDCl<sub>3</sub>  
 Ambient temperature  
 Total 64 repetitions

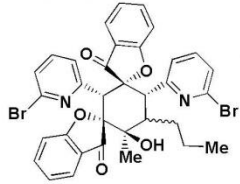

Ratio = 2 : 1

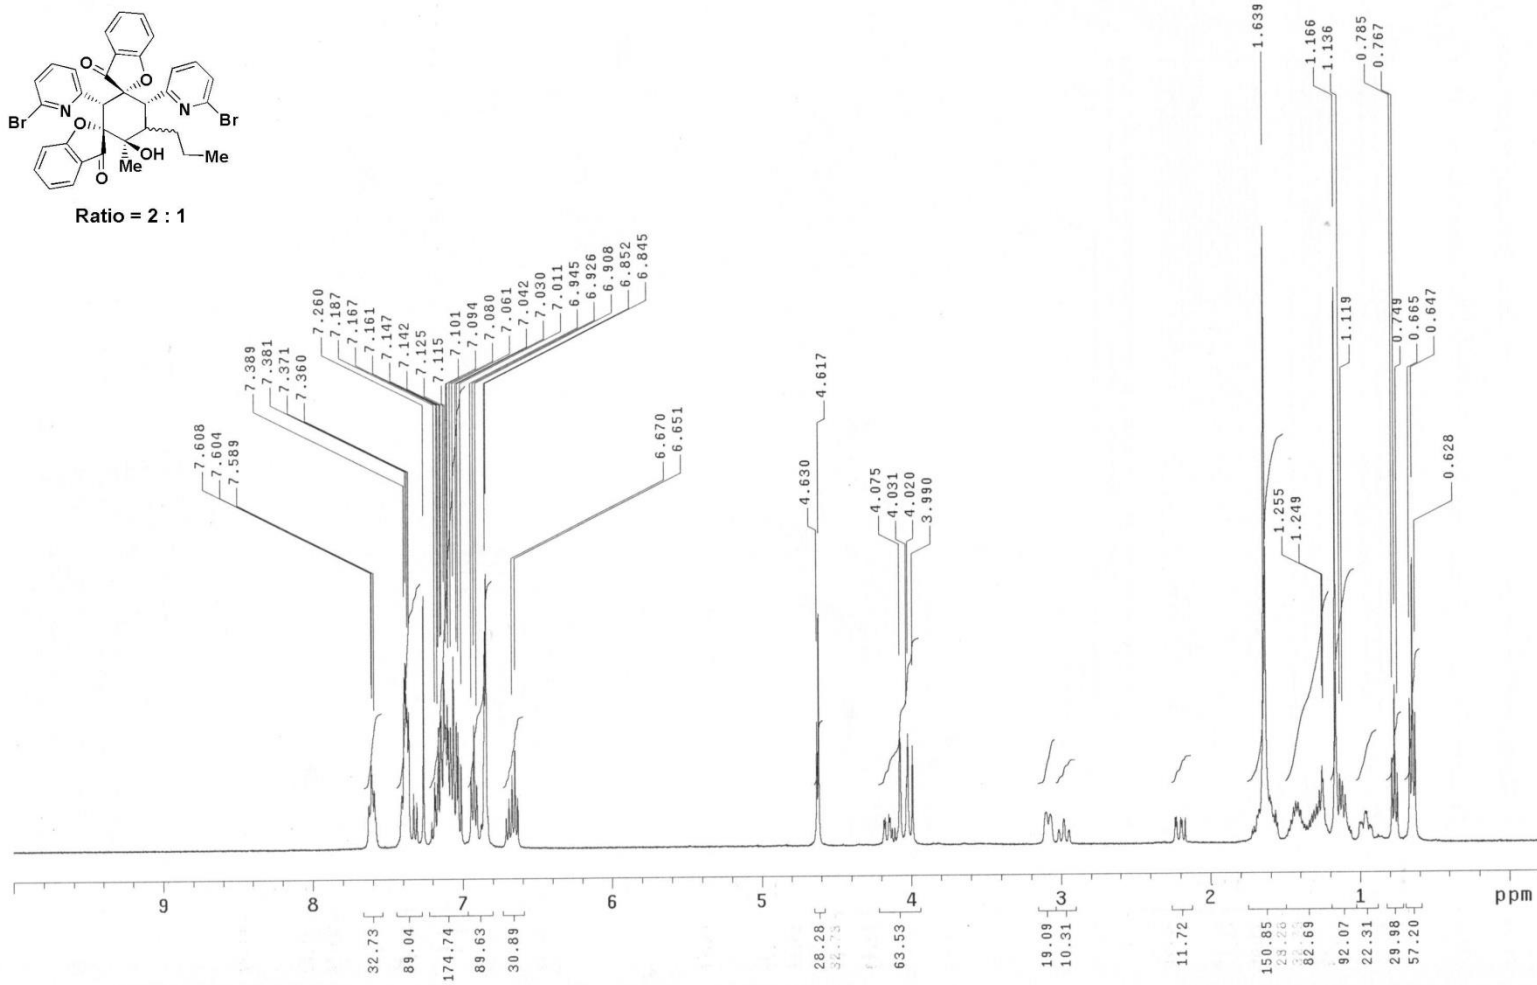

# Compound 3w (<sup>13</sup>C-NMR spectral data)

KTPPrPB

Pulse Sequence: s2pu1  
 UNITYplus-400 "unity400"  
 Date: Jun 27 2019  
 Solvent: CDCl<sub>3</sub>  
 Ambient temperature  
 Total 34336 repetitions

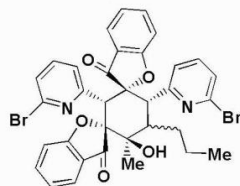

Ratio = 2 : 1

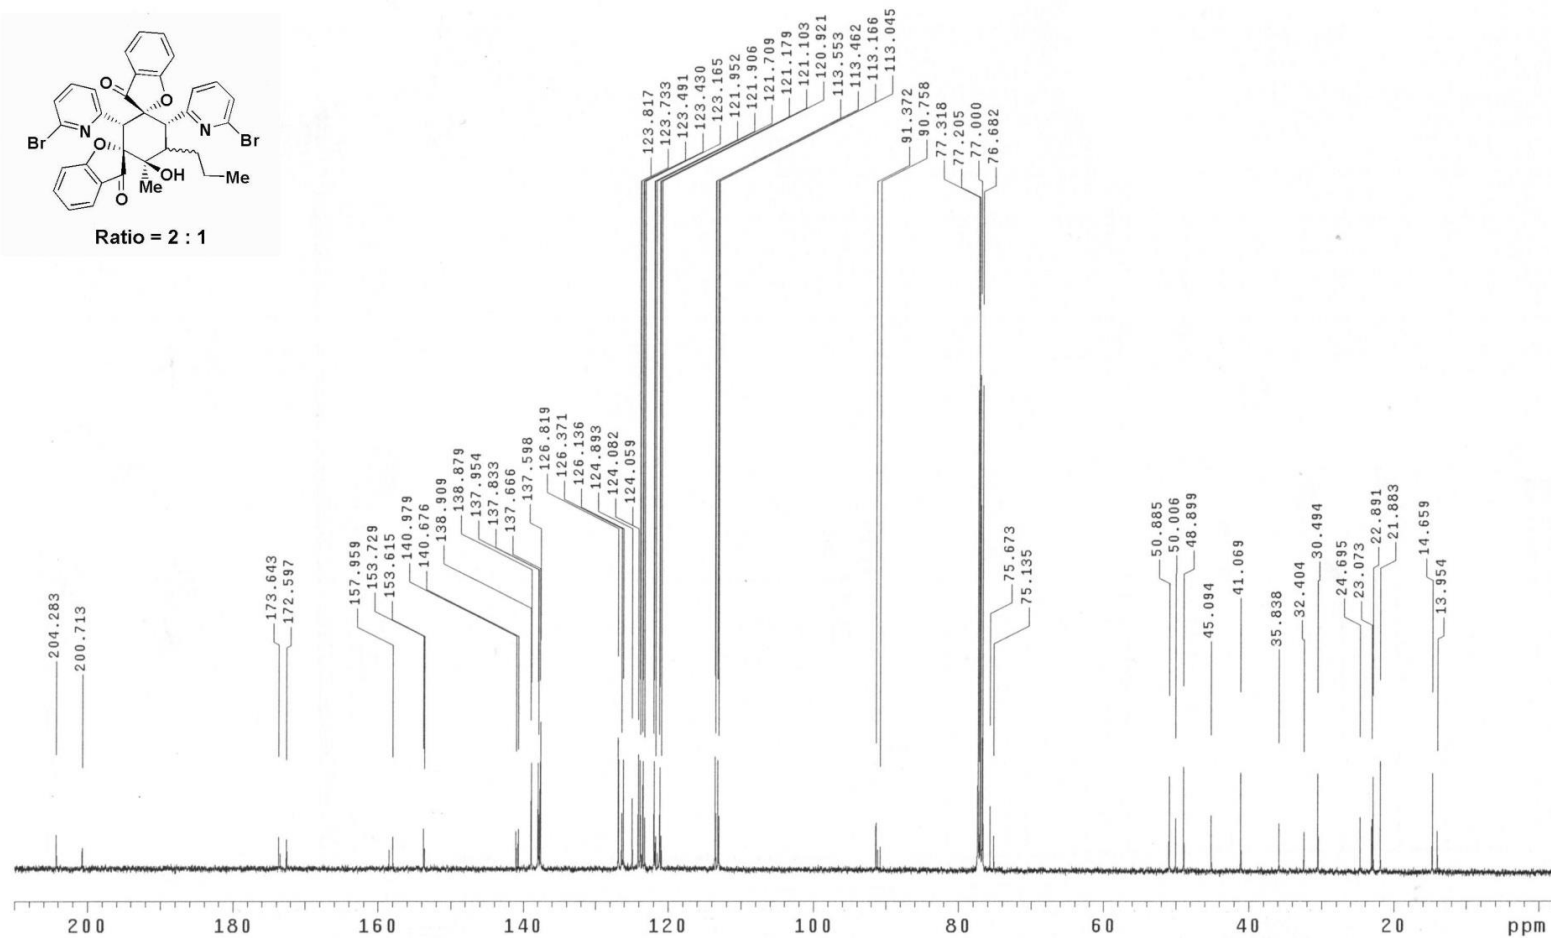

# Compound 3y (<sup>1</sup>H-NMR spectral data)

KT1081003  
Pulse Sequence: s2pu1  
UNITYplus-400 "unity400"  
Date: Oct 4 2019  
Solvent: CDCl<sub>3</sub>  
Ambient temperature  
Total 32 repetitions

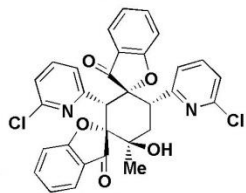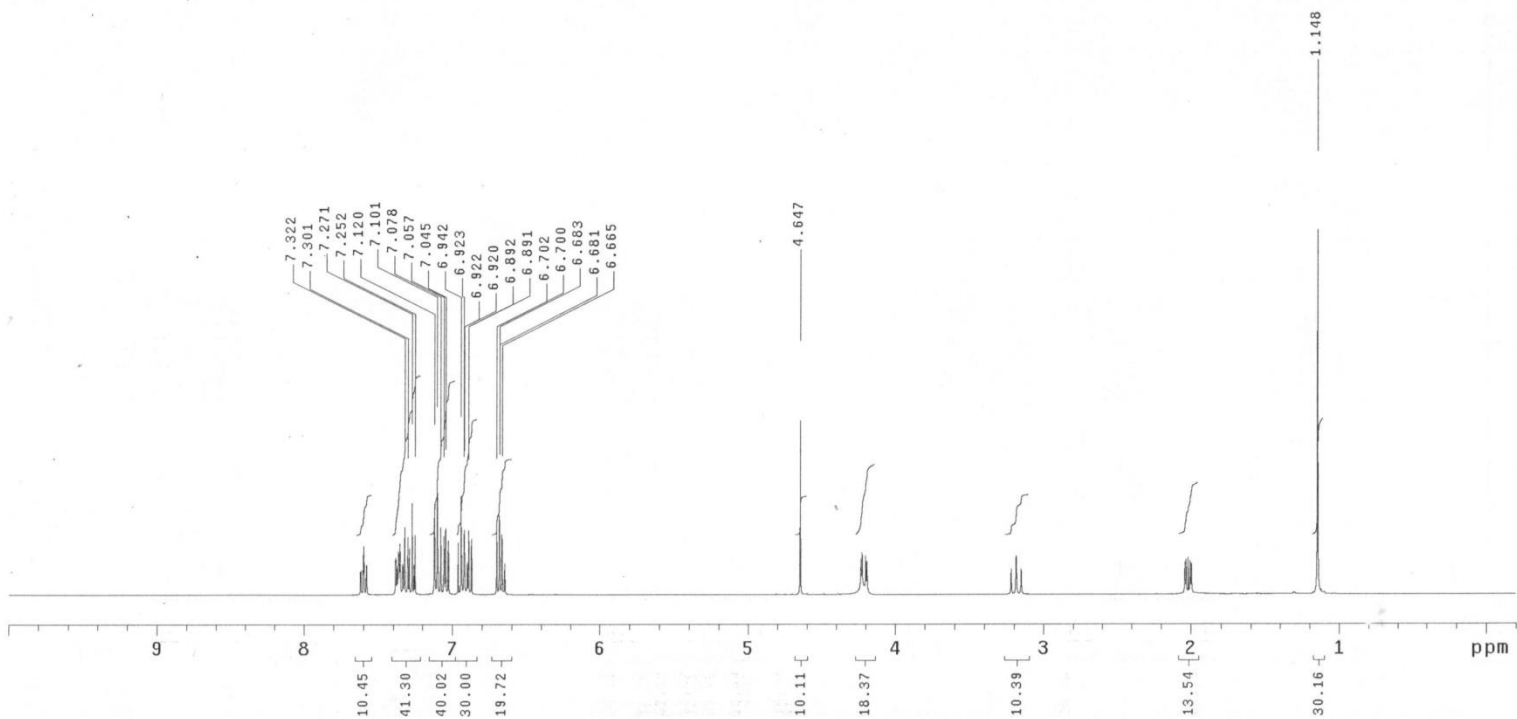



# Compound 3y (<sup>13</sup>C-NMR spectral data)

KT1081003

Pulse Sequence: s2pu1  
UNITYplus-400 "unity400"  
Date: Oct 4 2019  
Solvent: CDCl<sub>3</sub>  
Ambient temperature  
Total 736 repetitions

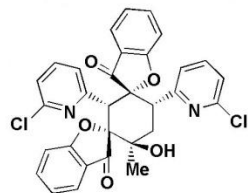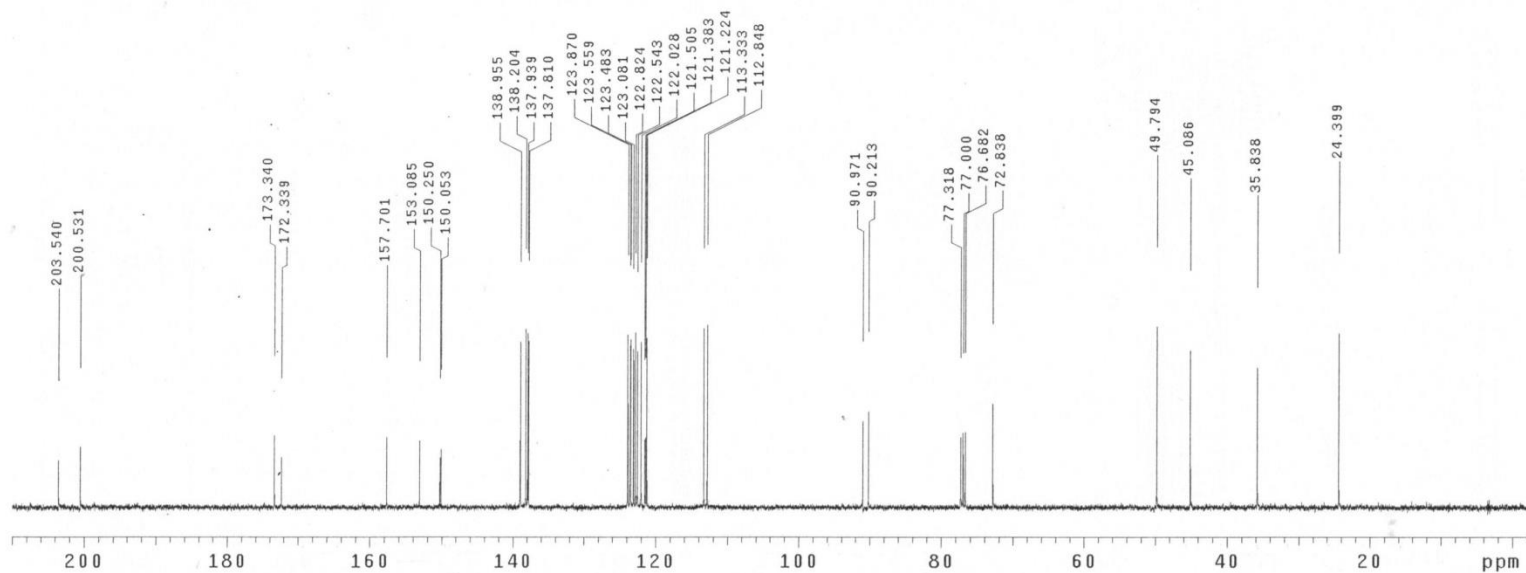

# Compound 3z (<sup>1</sup>H-NMR spectral data)

KT1081014

Pulse Sequence: s2pu1  
UNITYplus-400 "unity400"  
Date: Oct 18 2019  
Solvent: CDCl<sub>3</sub>  
Ambient temperature  
Total 64 repetitions

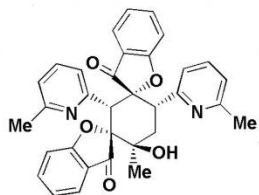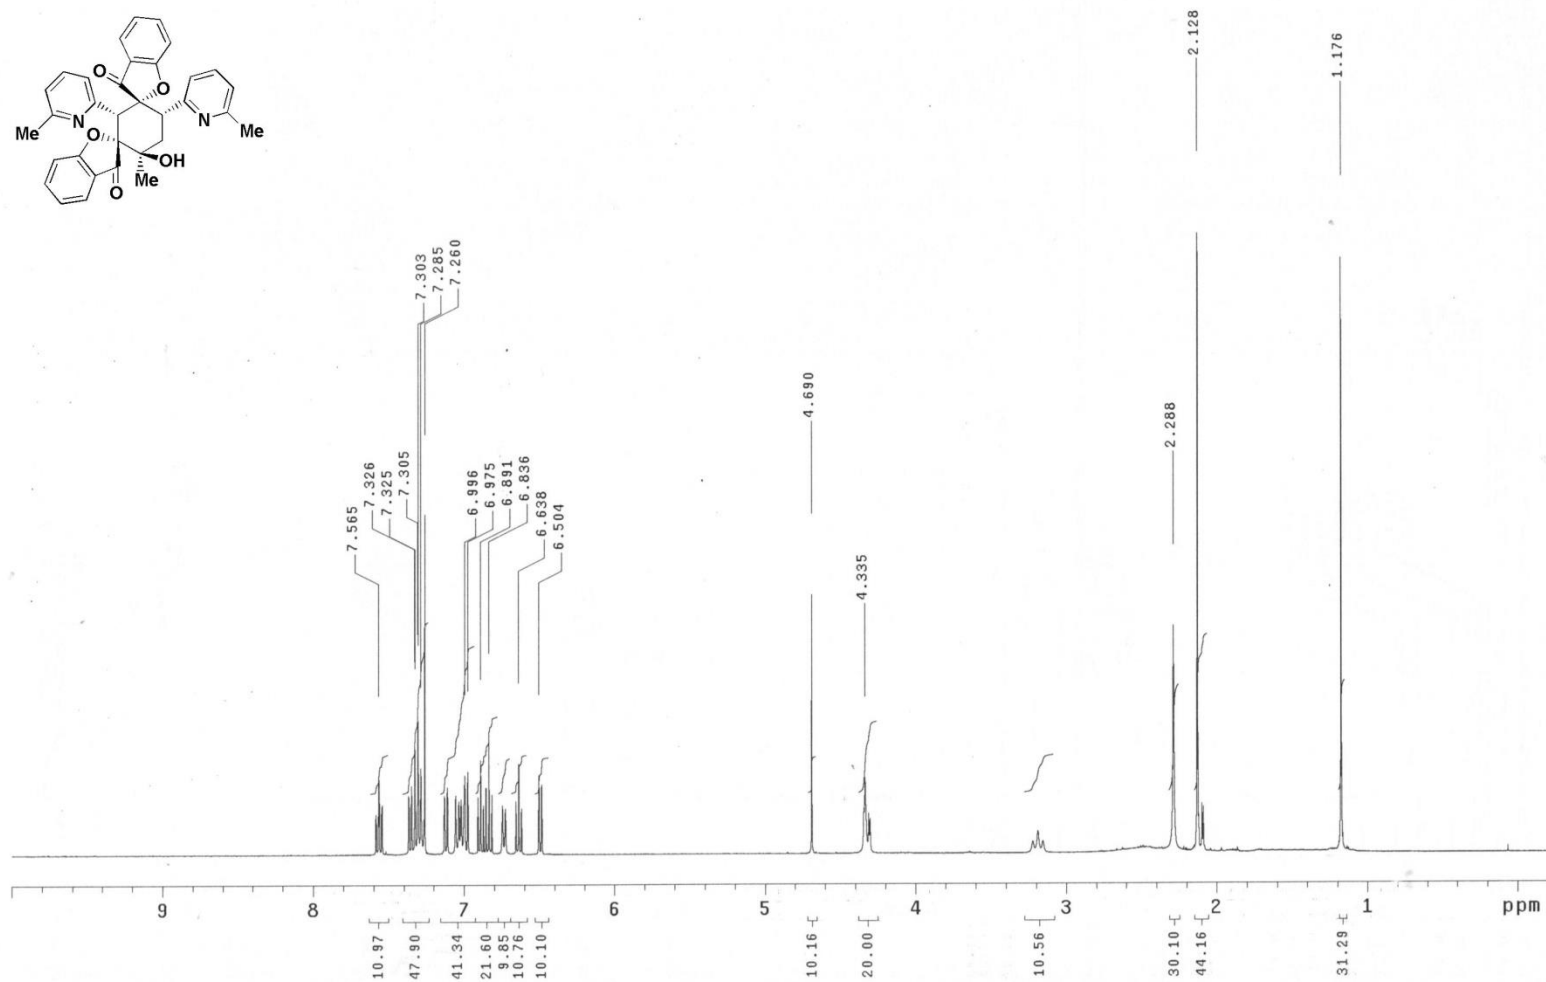

# Compound 3z (<sup>13</sup>C-NMR spectral data)

KT1081014

Pulse Sequence: s2pu1  
UNITYplus-400 "unity400"  
Date: Oct 18 2019  
Solvent: CDCl<sub>3</sub>  
Ambient temperature  
Total 8016 repetitions

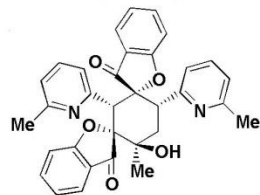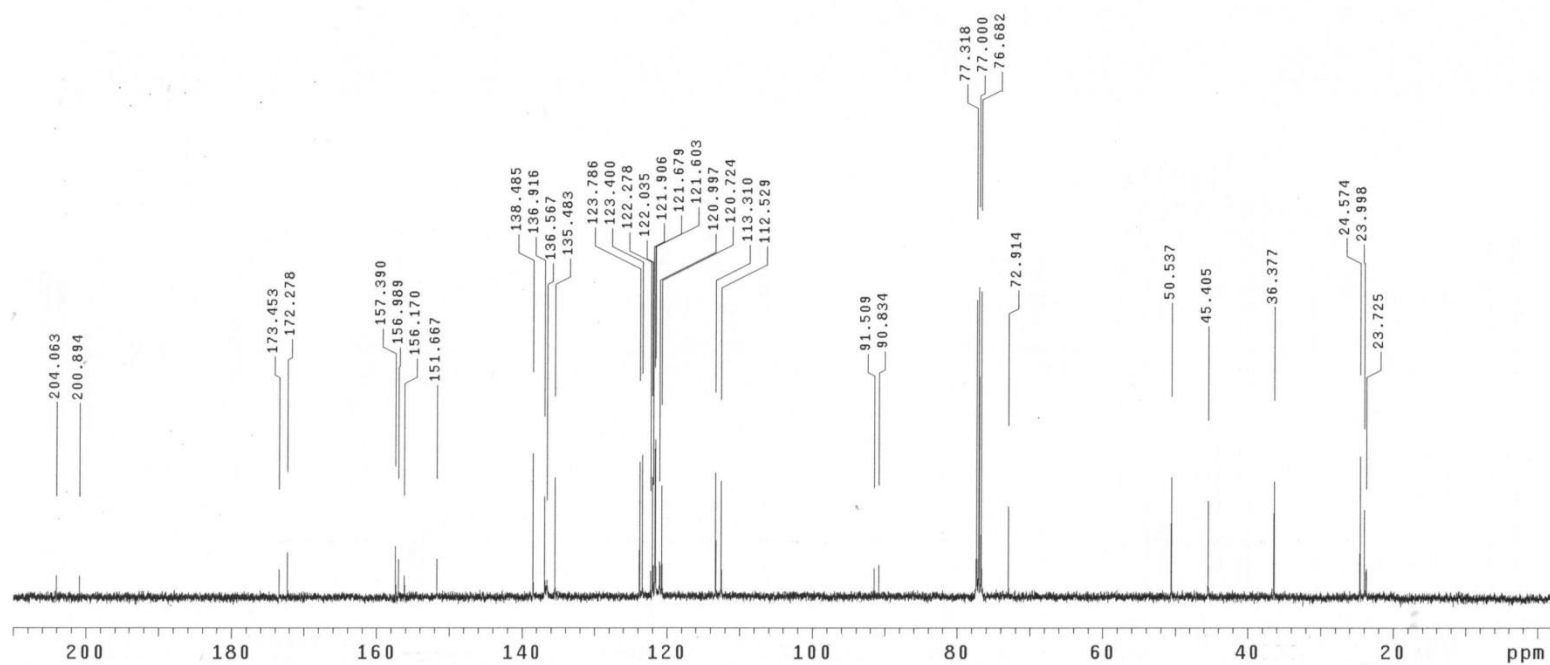

# Compound 3aa (<sup>1</sup>H-NMR spectral data)

KT1081001

Pulse Sequence: s2pu1  
UNITYplus-400 "unity400"  
Date: Oct 1 2019  
Solvent: CDCl<sub>3</sub>  
Ambient temperature  
Total 160 repetitions

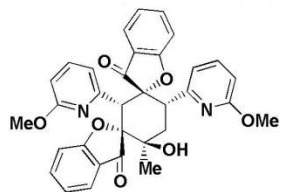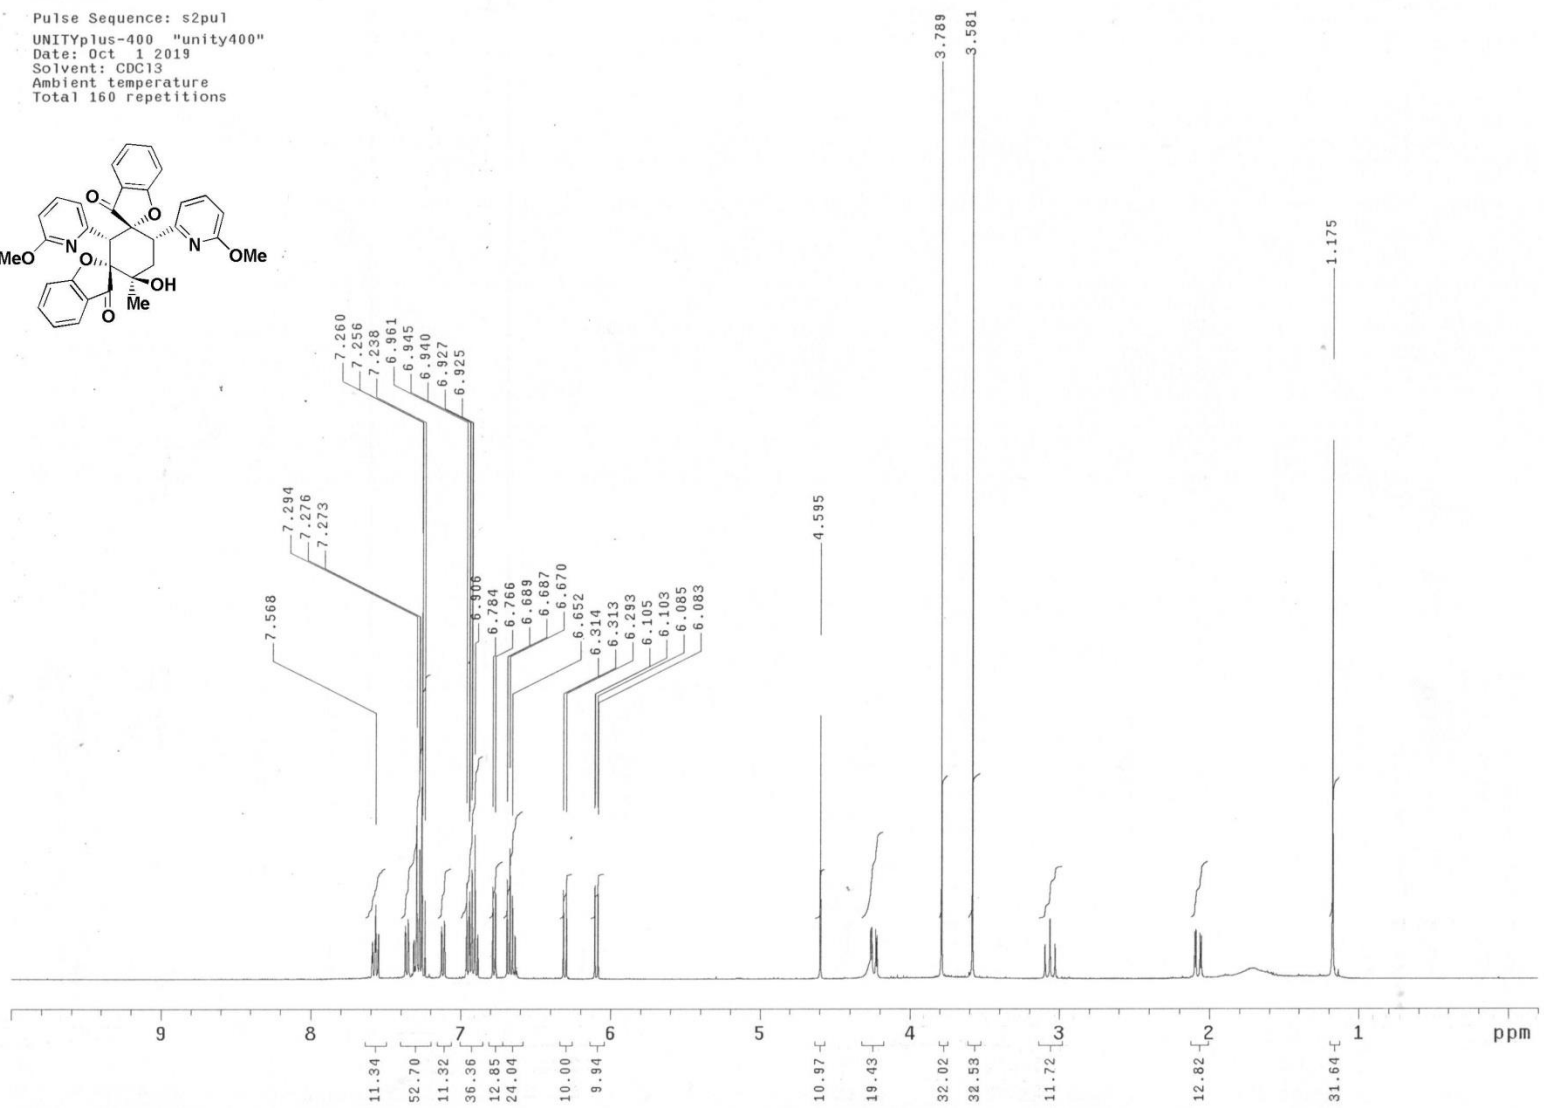

# Compound 3aa (<sup>13</sup>C-NMR spectral data)

KT1081001

Pulse Sequence: s2pu1  
UNITYplus-400 "unity400"  
Date: Oct 1 2019  
Solvent: CDCl<sub>3</sub>  
Ambient temperature  
Total 35680 repetitions

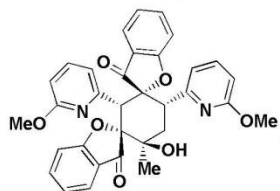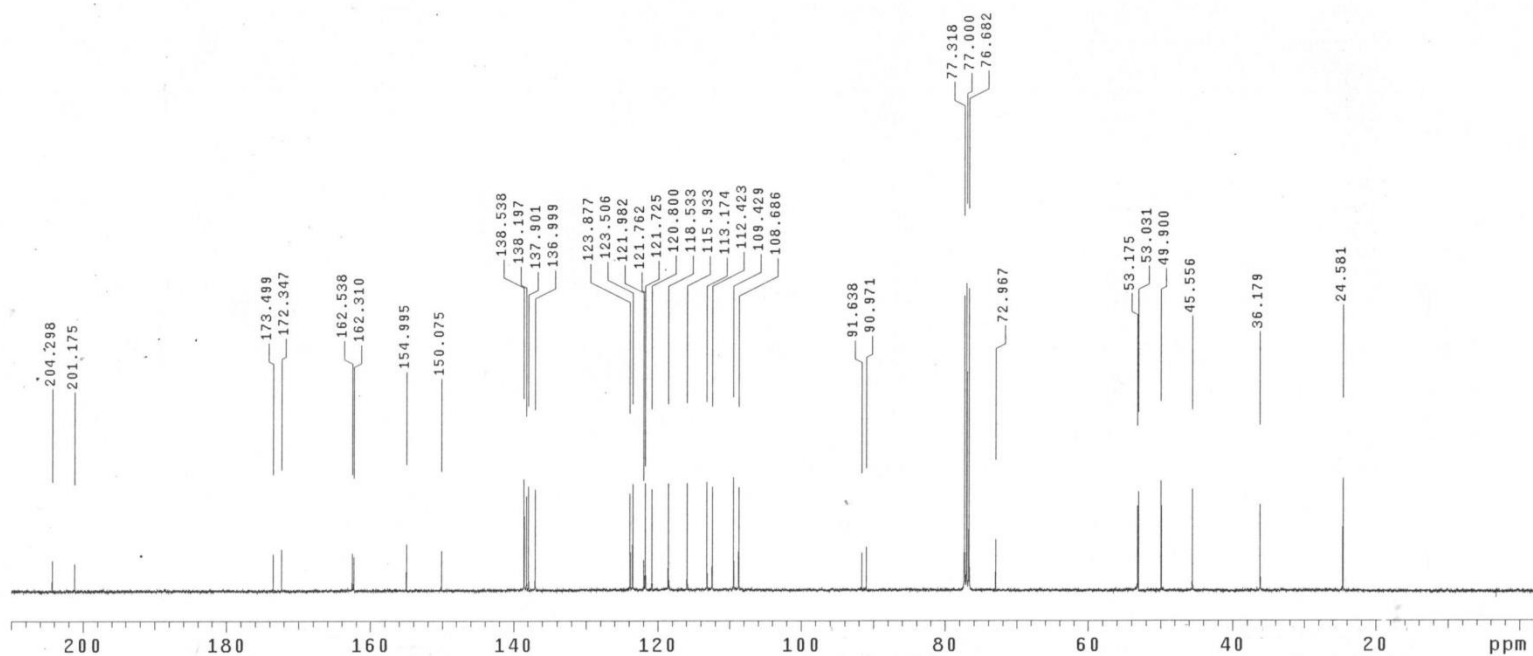

# Compound 3ab (<sup>1</sup>H-NMR spectral data)

KT1080927

Pulse Sequence: s2pu1  
UNITYplus-400 "unity400"  
Date: Sep 30 2019  
Solvent: CDCl<sub>3</sub>  
Ambient temperature  
Total 160 repetitions

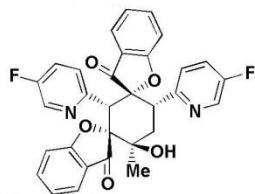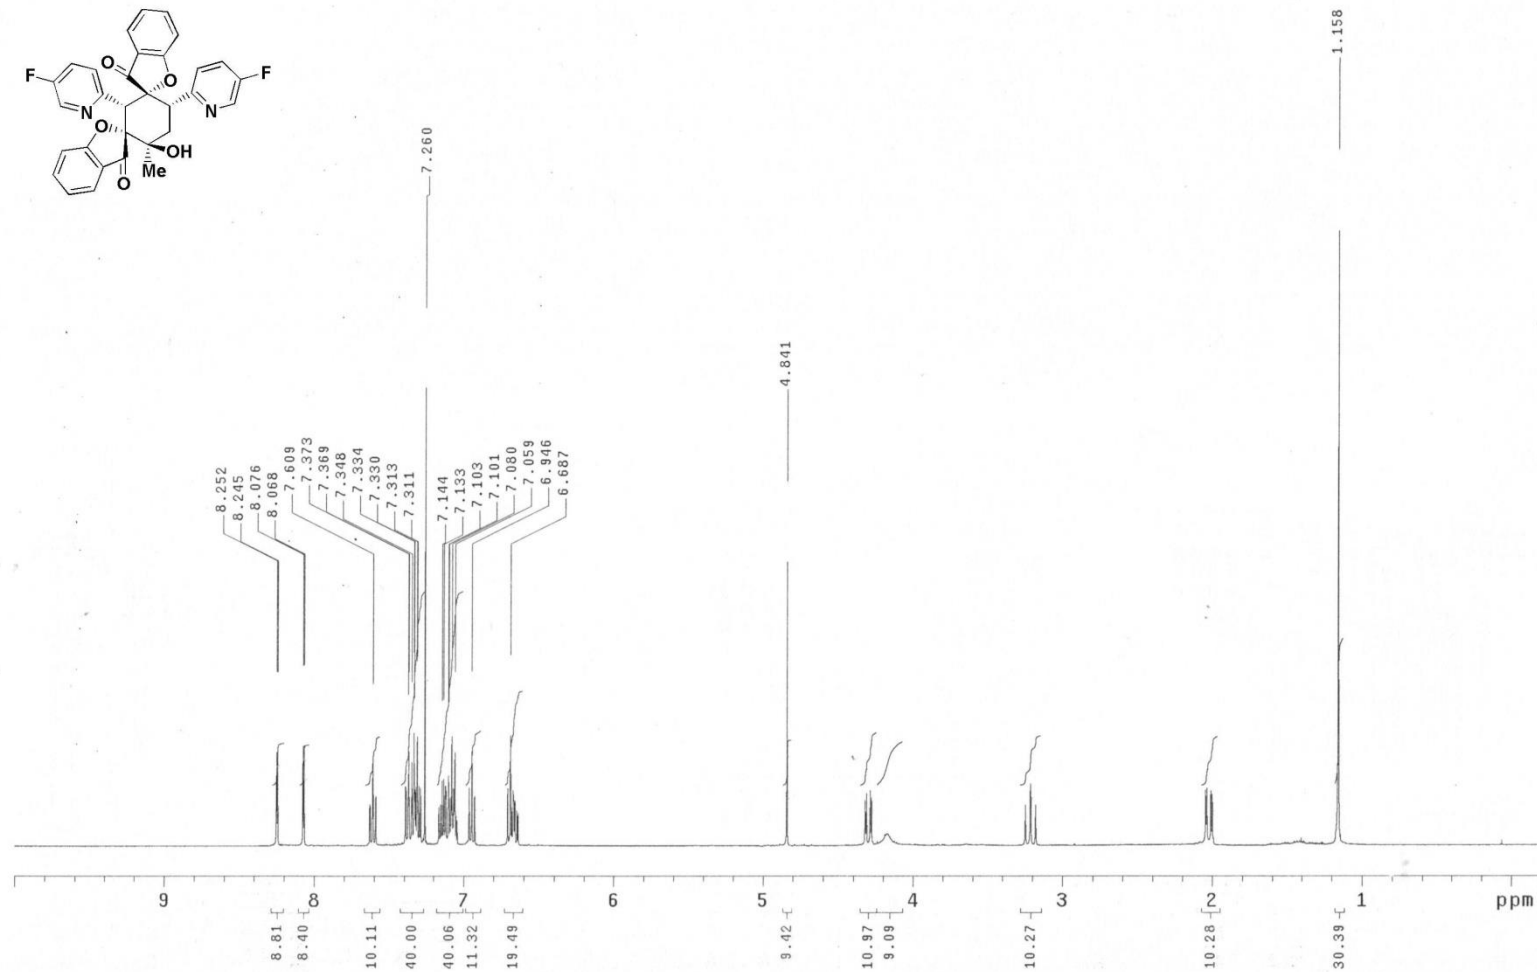

# Compound 3ab (<sup>13</sup>C-NMR spectral data)

KT1080927

Pulse Sequence: s2pul  
UNITYplus-400 "unity400"  
Date: Sep 30 2019  
Solvent: CDCl<sub>3</sub>  
Ambient temperature  
Total 30912 repetitions

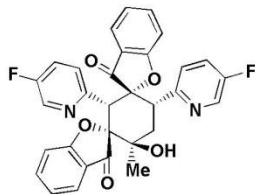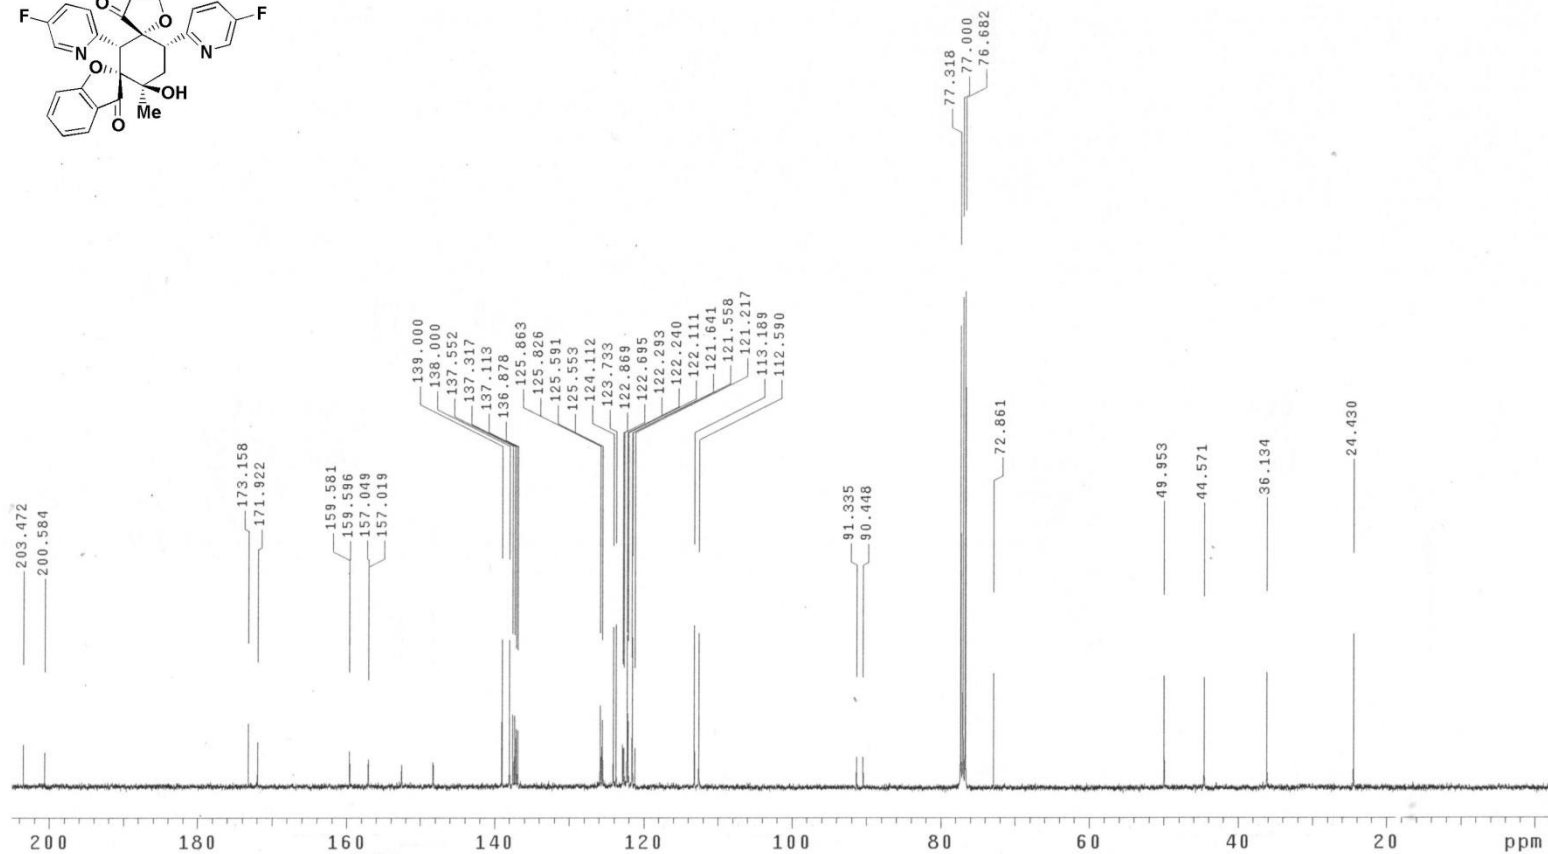

# Compound 3ac (<sup>1</sup>H-NMR spectral data)

KT1081016

Pulse Sequence: s2pu1  
UNITYplus-400 "unity400"  
Date: Oct 17 2019  
Solvent: CDCl3  
Ambient temperature  
Total 80 repetitions

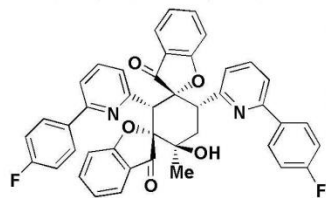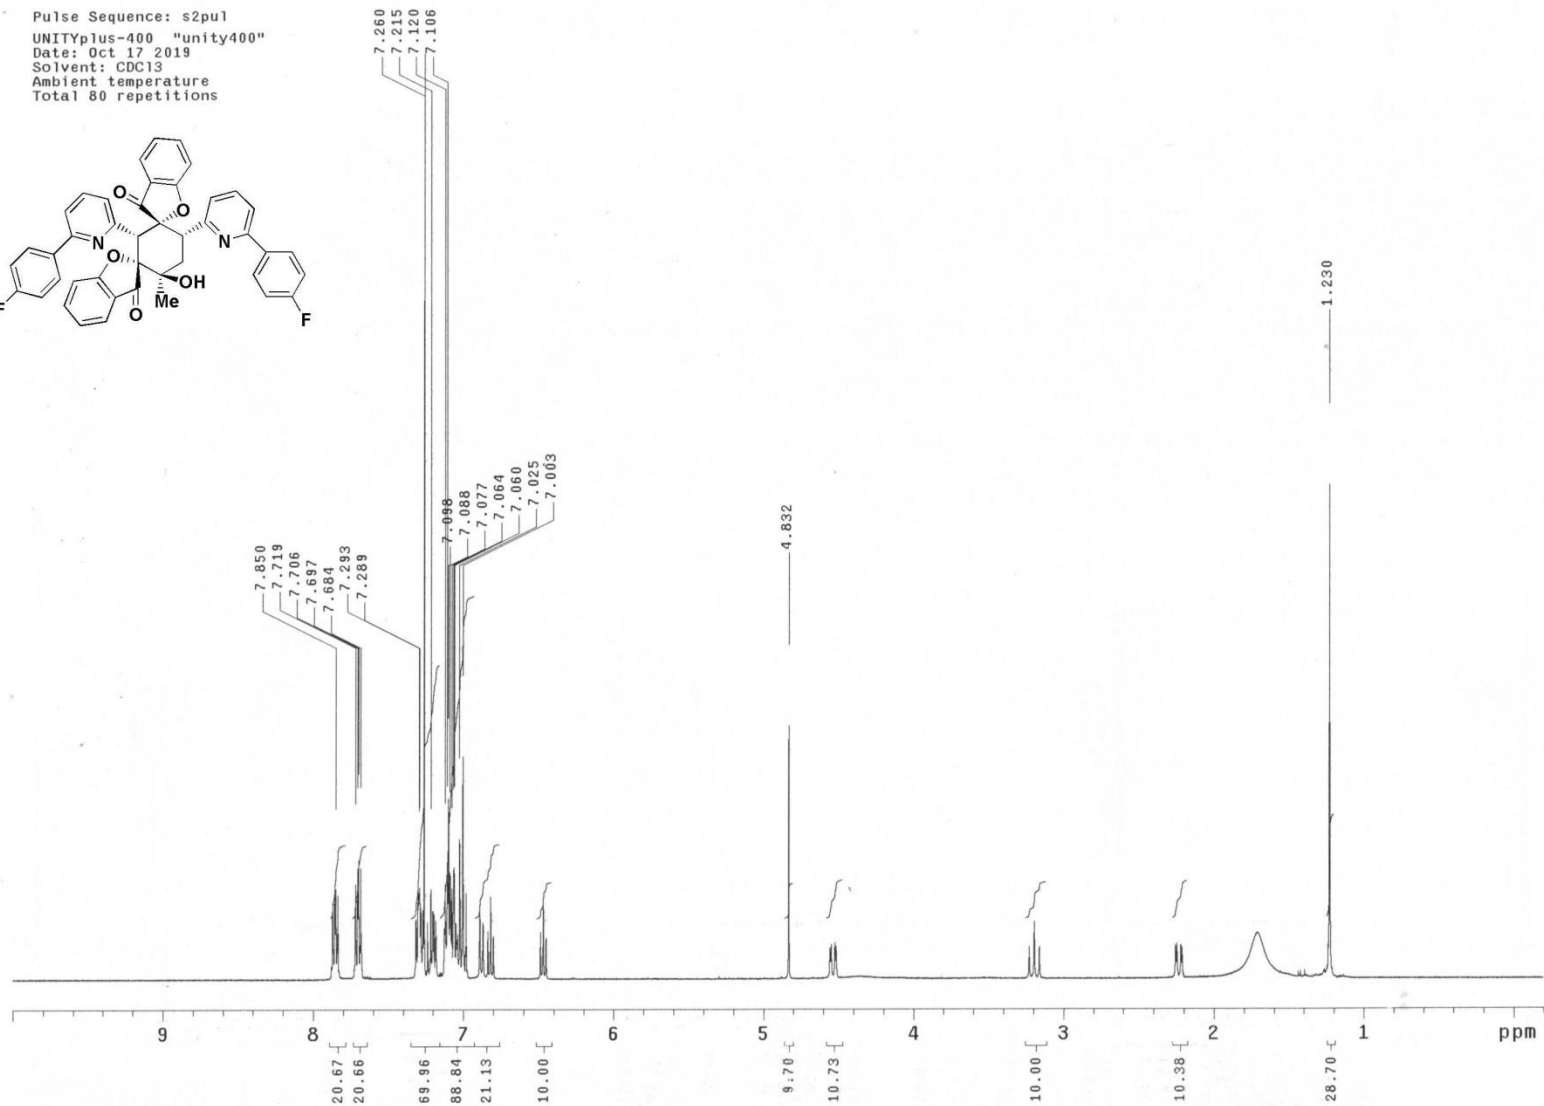



# Compound 3ac (<sup>13</sup>C-NMR spectral data)

Pulse Sequence: s2pu1  
UNITYplus-400 "unity400"  
Date: Oct 17 2019  
Solvent: CDC13  
Ambient temperature  
Total 32384 repetitions

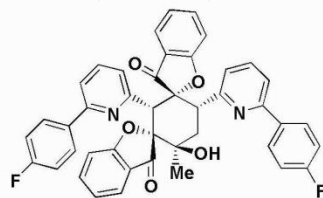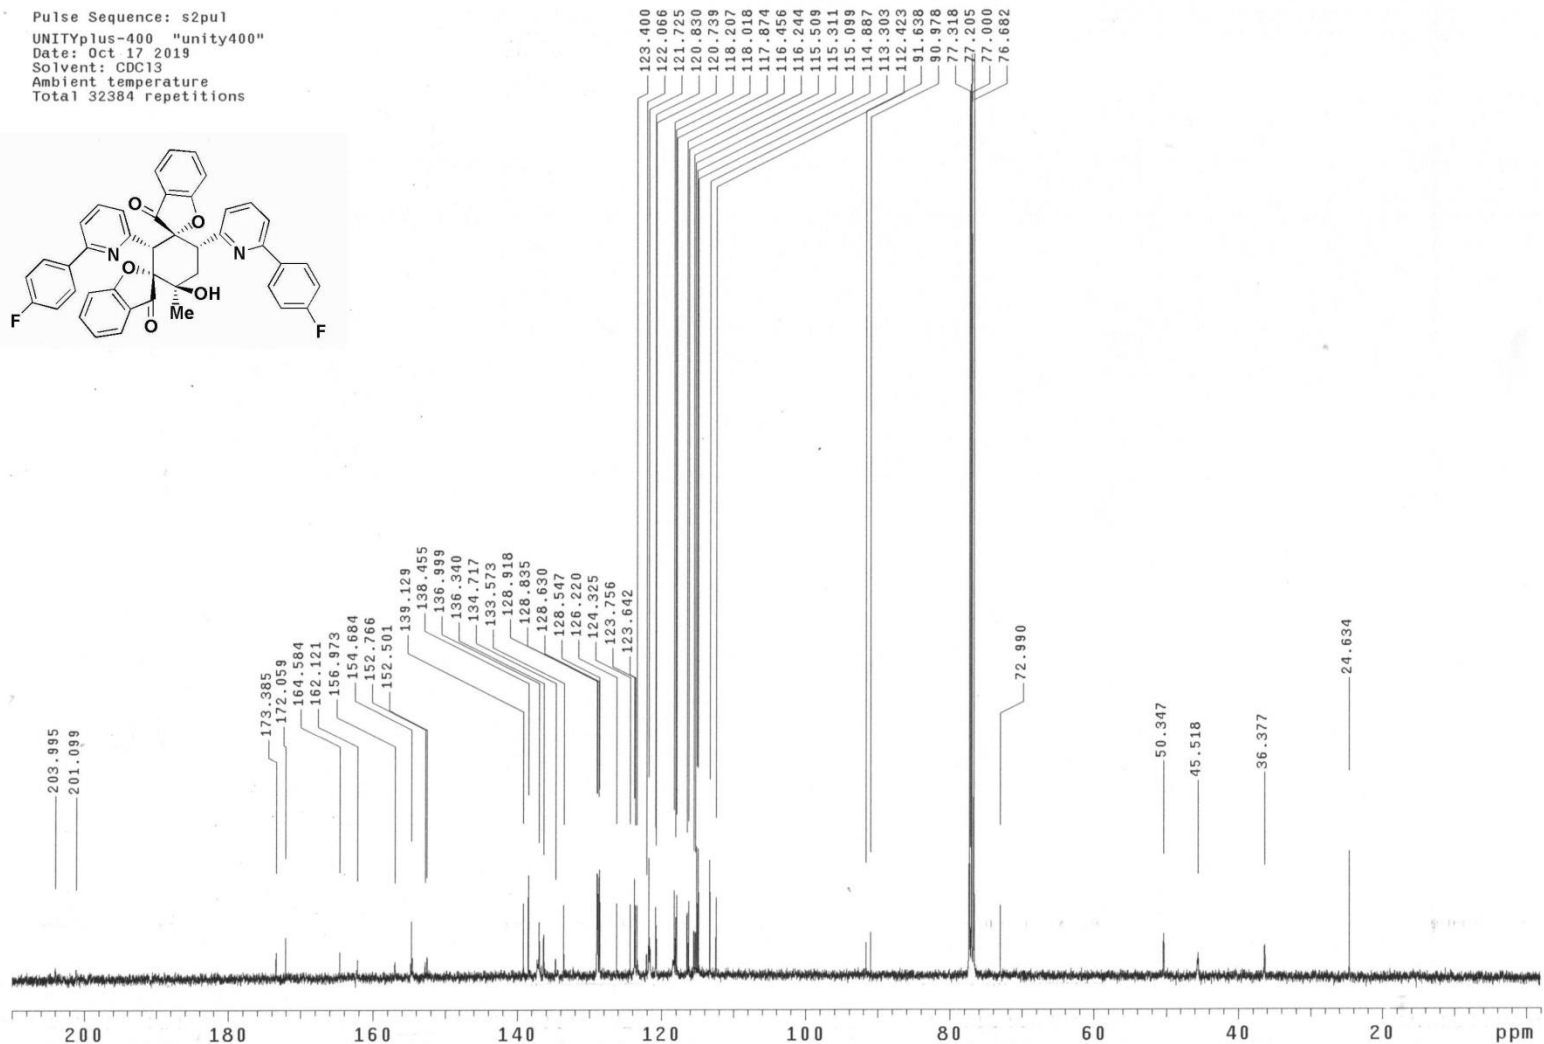

# Compound 4a (<sup>1</sup>H-NMR spectral data)

HANBr25

Pulse Sequence: s2pu1  
UNITYplus-400 "unity400"  
Date: Jan 22 2018  
Solvent: CDCl<sub>3</sub>  
Ambient temperature  
Total 32 repetitions

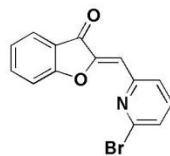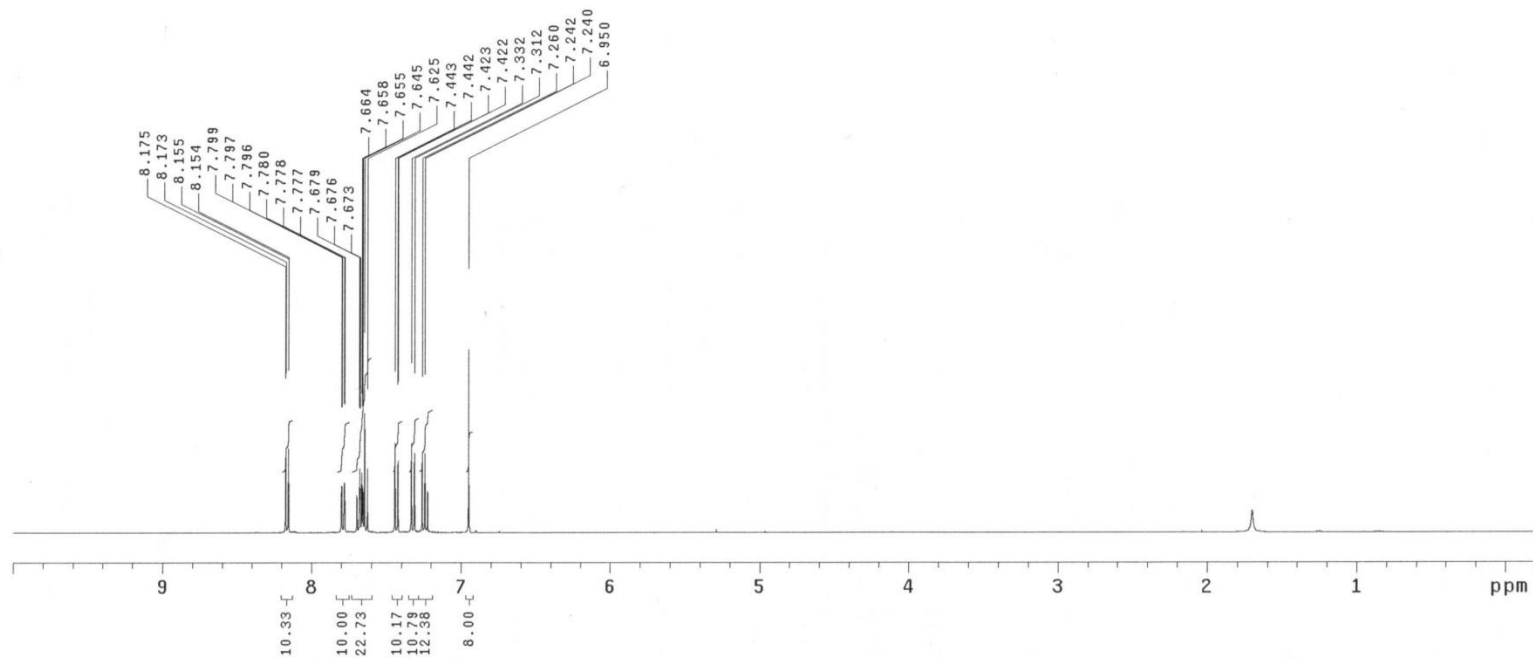

# Compound 4a (<sup>13</sup>C-NMR spectral data)

Pulse Sequence: s2pu1  
UNITYplus-400 "unity400"  
Date: Jan 22 2018  
Solvent: CDCl<sub>3</sub>  
Ambient temperature  
Total 2800 repetitions

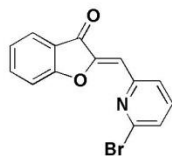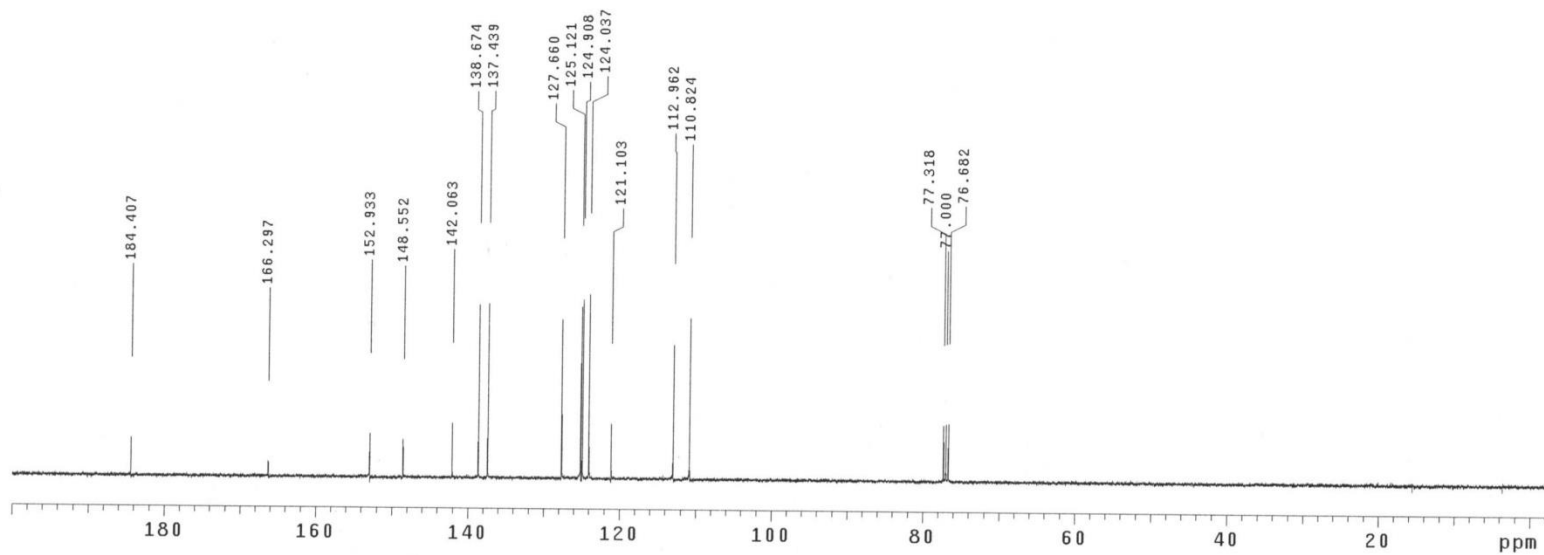

# Compound 4ac (<sup>1</sup>H-NMR spectral data)

HANFPh30  
Pulse Sequence: s2pu1  
UNITYplus-400 "unity400"  
Date: Mar 12 2018  
Solvent: CDCl<sub>3</sub>  
Ambient temperature  
Total 32 repetitions

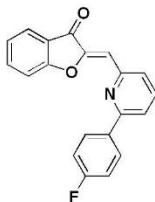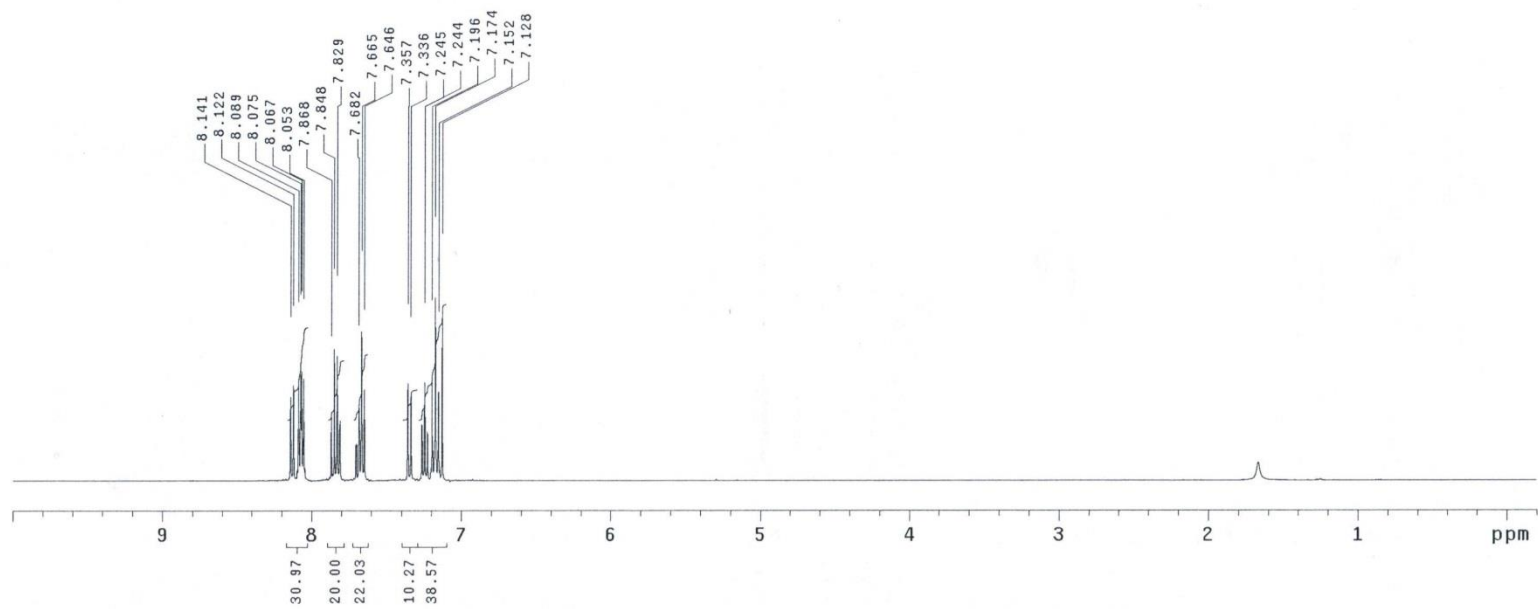

# Compound 4ac (<sup>13</sup>C-NMR spectral data)

HANFPh30  
Pulse Sequence: s2pu1  
UNITYplus-400 "unity400"  
Date: Mar 12 2018  
Solvent: CDC13  
Ambient temperature  
Total 3616 repetitions

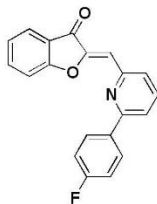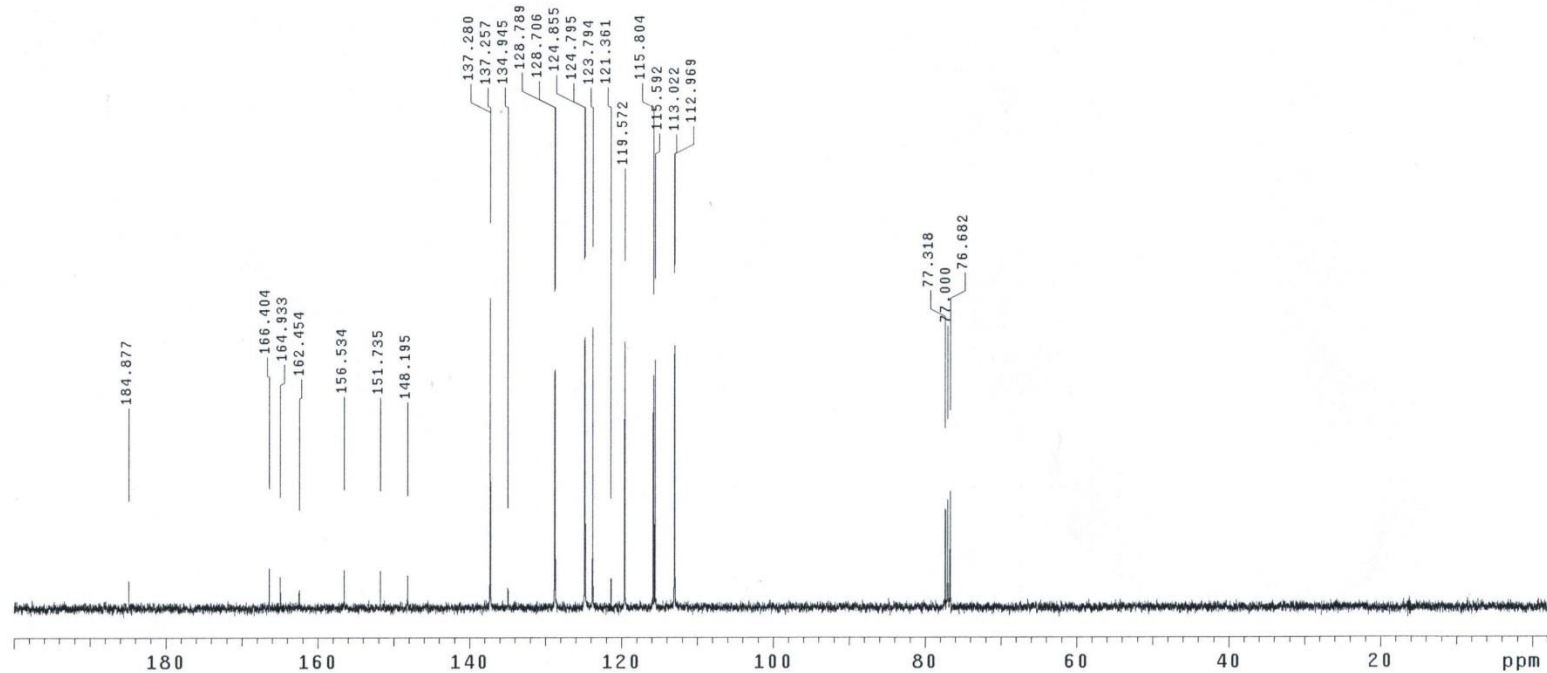

# Compound 5a (<sup>1</sup>H-NMR spectral data)

HAPh5h

Pulse Sequence: s2pu1

UNITYplus-400 "unity400"

Date: Aug 8 2018

Solvent: CDC13

Ambient temperature

Total 64 repetitions

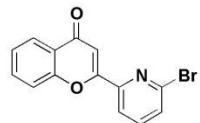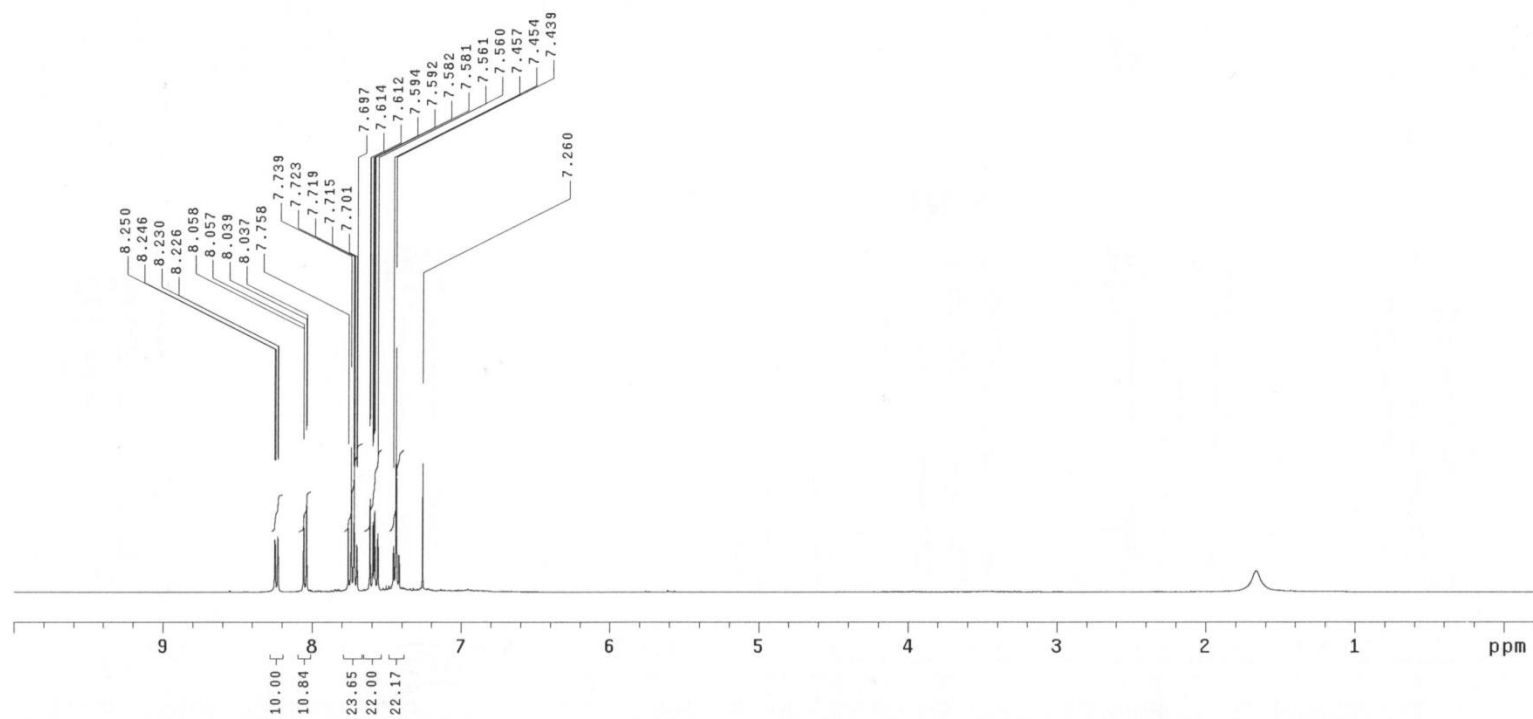

# Compound 5a (<sup>13</sup>C-NMR spectral data)

HAPh5h

Pulse Sequence: s2pu1  
UNITYplus-400 "unity400"  
Date: Aug 8 2018  
Solvent: CDCl3  
Ambient temperature  
Total 16000 repetitions

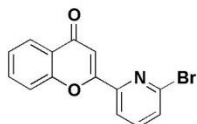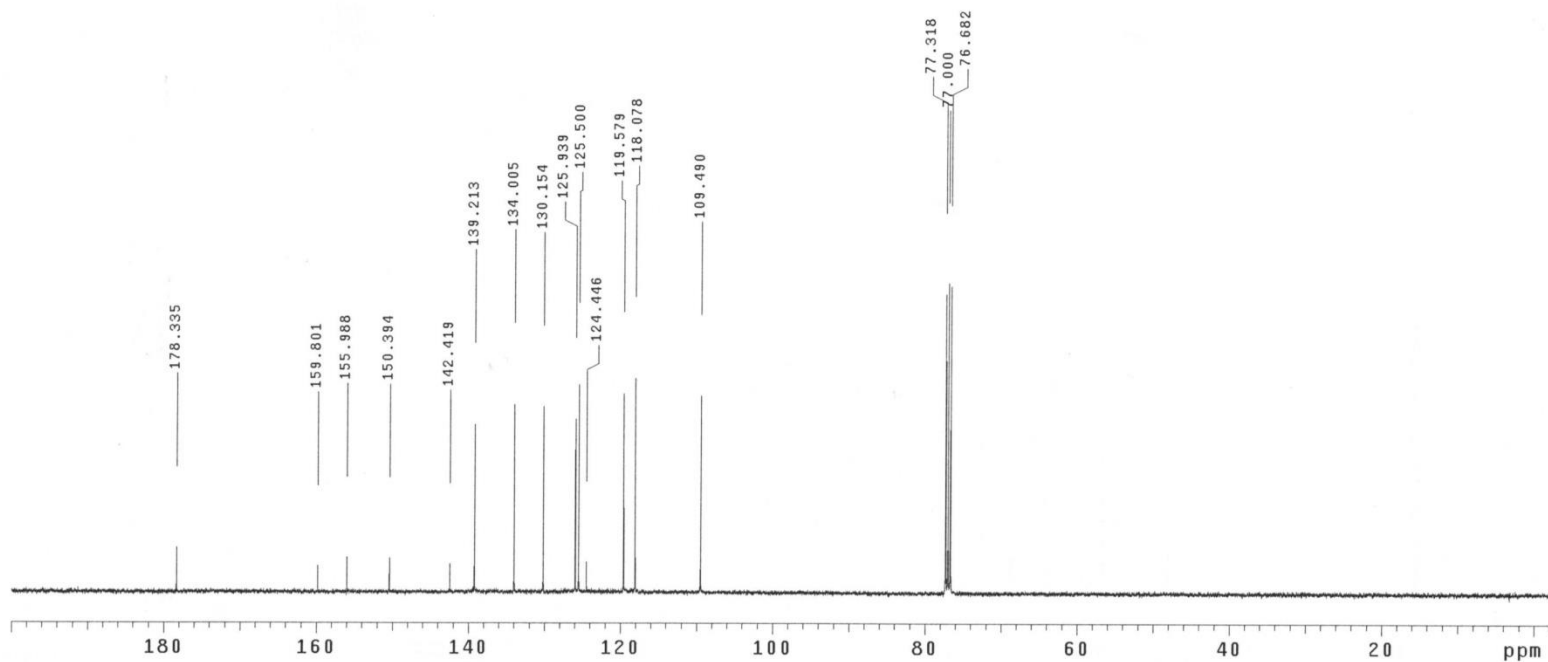

# Compound 6 (<sup>1</sup>H-NMR spectral data-400 MHz)

KT1080930

Pulse Sequence: s2pu1  
UNITYplus-400 "unity400"  
Date: Oct 1 2019  
Solvent: CDC13  
Ambient temperature  
Total 32 repetitions

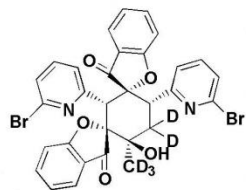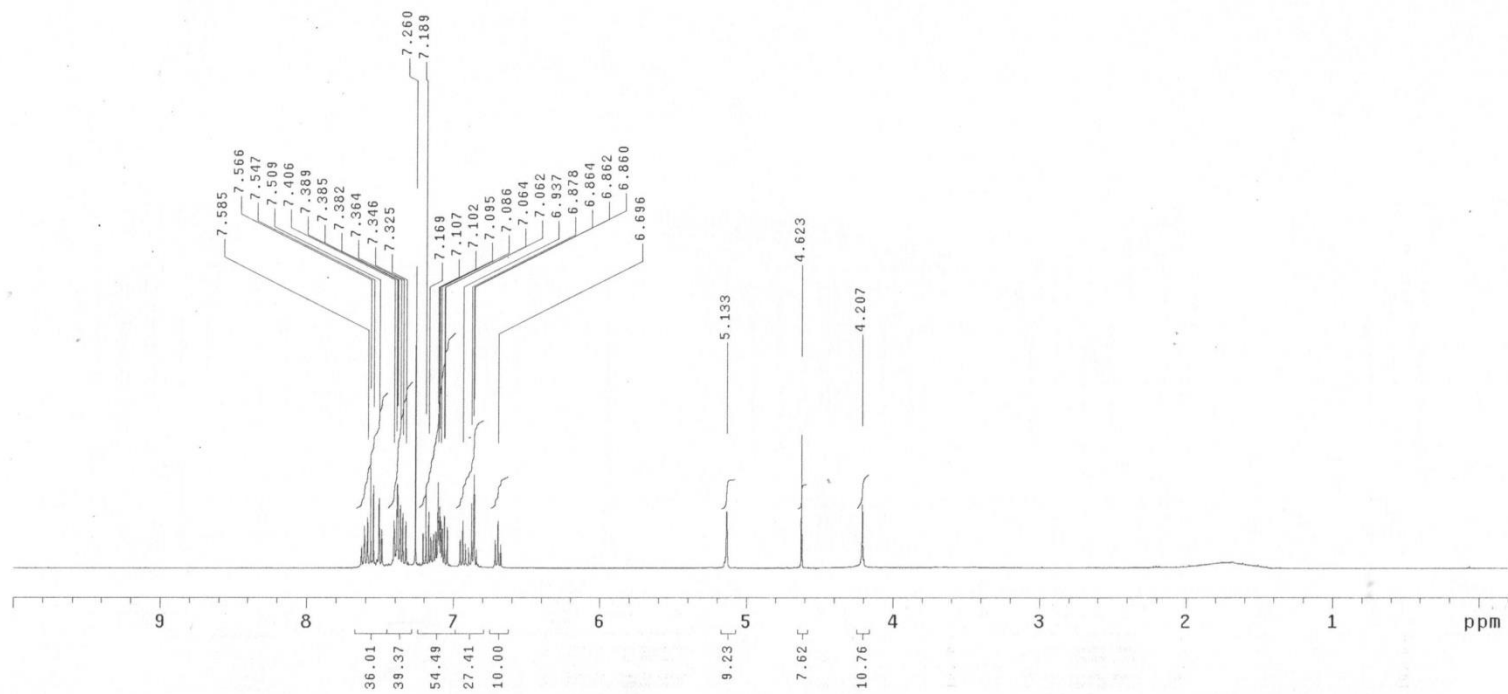



# Compound 6 (<sup>13</sup>C-NMR spectral data-1)

KT1080930

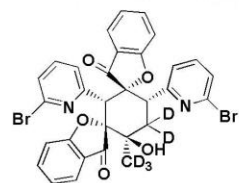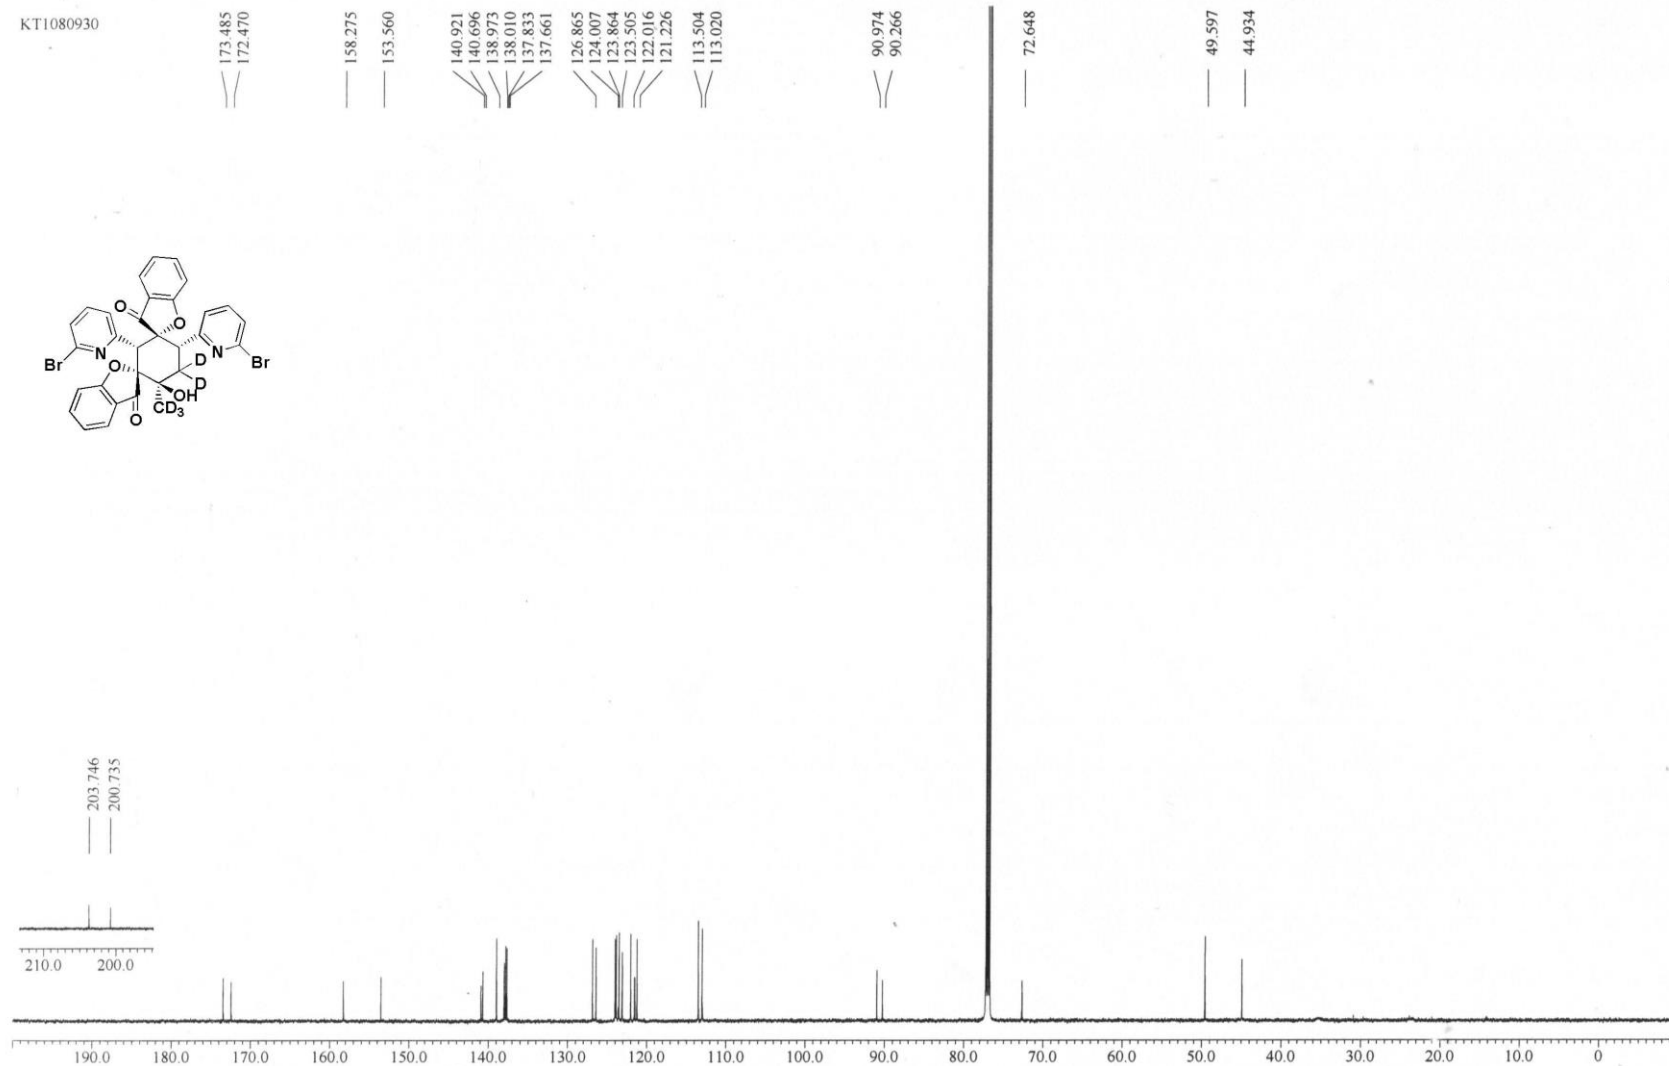

# Compound 6 (<sup>13</sup>C-NMR spectral data-2)

KT1080930

173.485  
172.470

158.275

153.560

140.921  
140.696  
138.973  
138.010  
137.833  
137.661

126.865  
126.430  
124.007  
123.864  
123.505  
123.088  
122.016  
121.551  
121.494  
121.226

113.504  
113.020

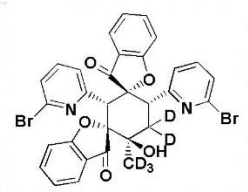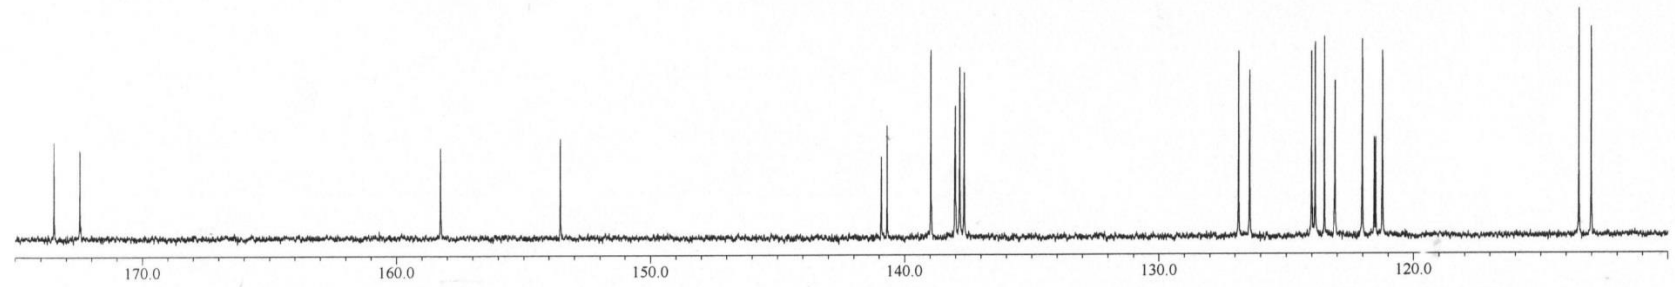

# Compound 6 (<sup>13</sup>C-NMR spectral data-3)

KT1080930

30.917

23.827

14.185  
14.103

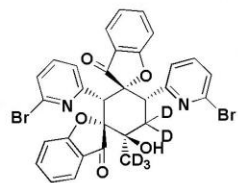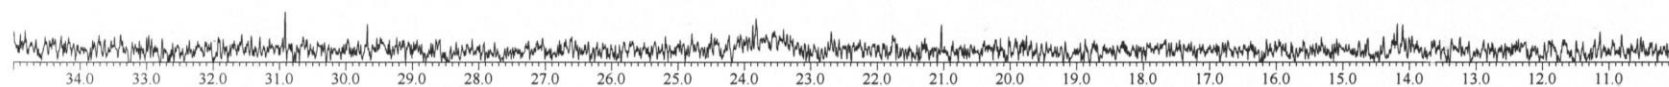

# Compound 6 (<sup>2</sup>H-NMR spectral data)

KT1080930-D2

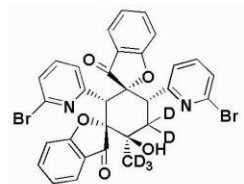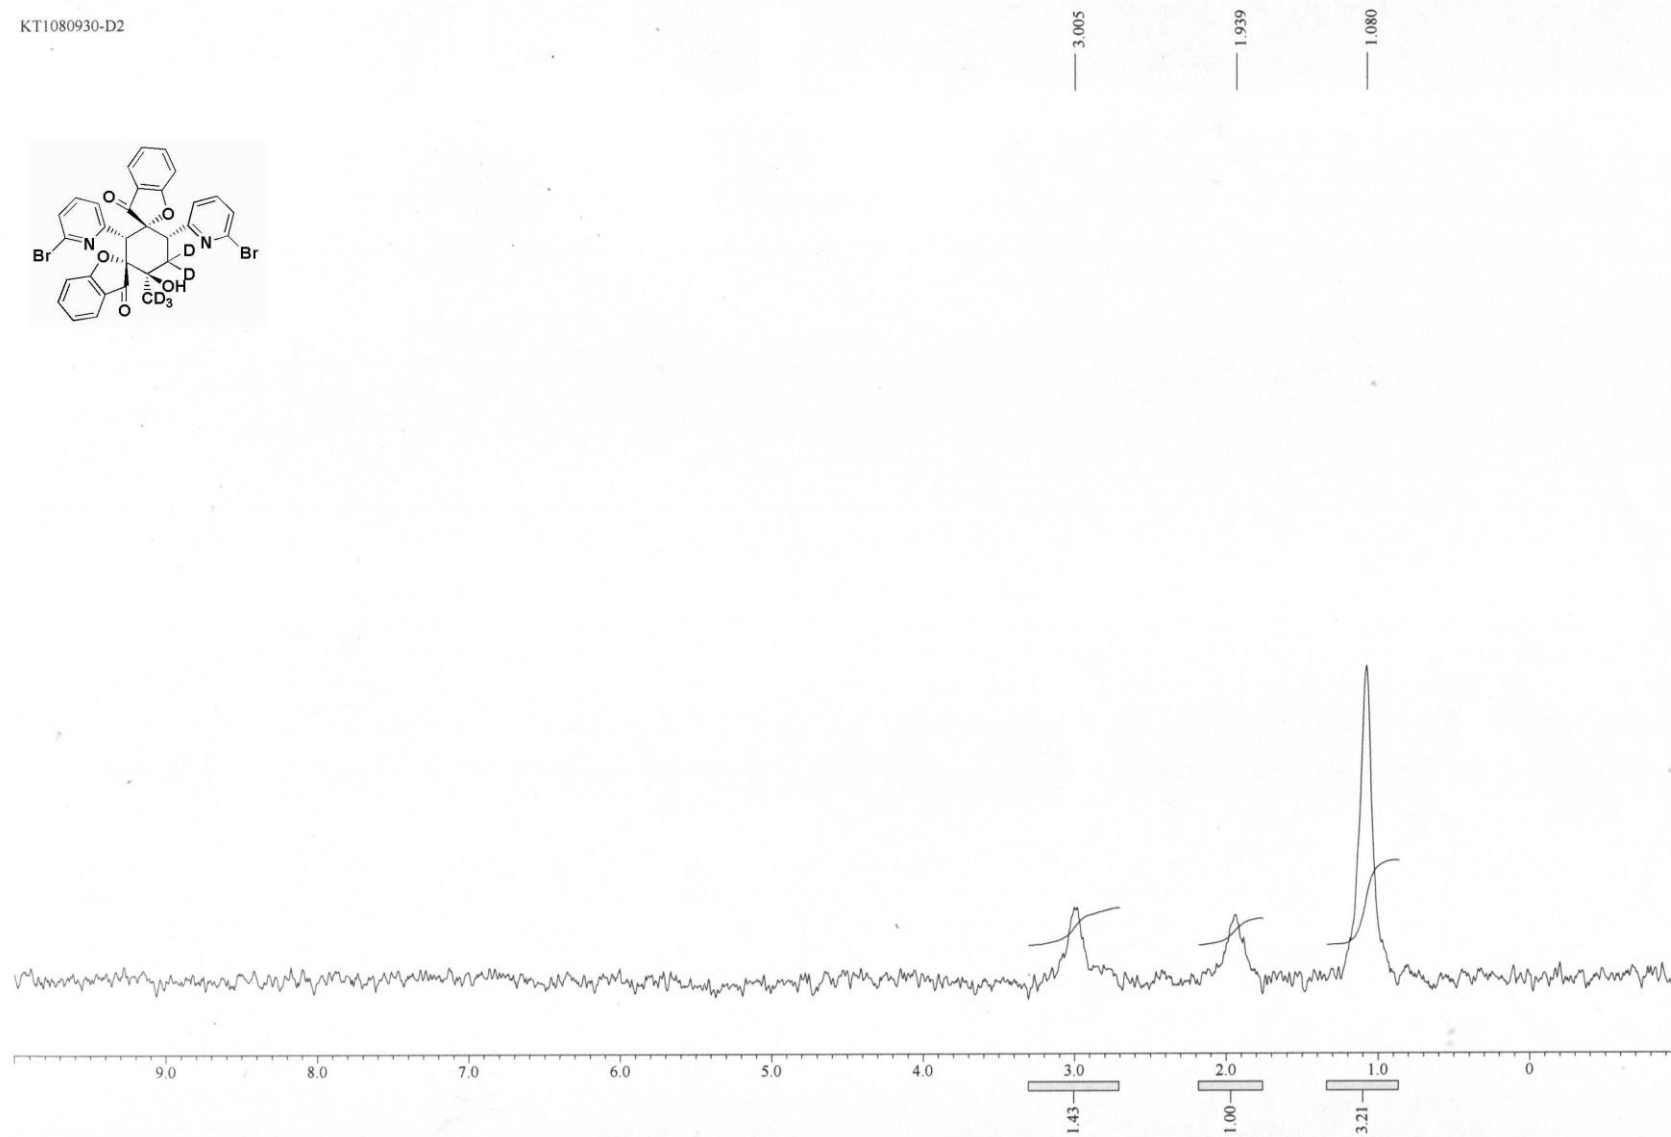

# Compound 3y-1 (<sup>1</sup>H-NMR spectral data)

KT6PC93

Pulse Sequence: s2pu1  
UNITYplus-400 "unity400"  
Date: Oct 7 2019  
Solvent: CDCl<sub>3</sub>  
Ambient temperature  
Total 32 repetitions

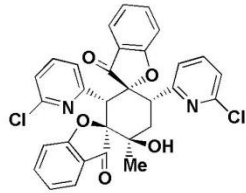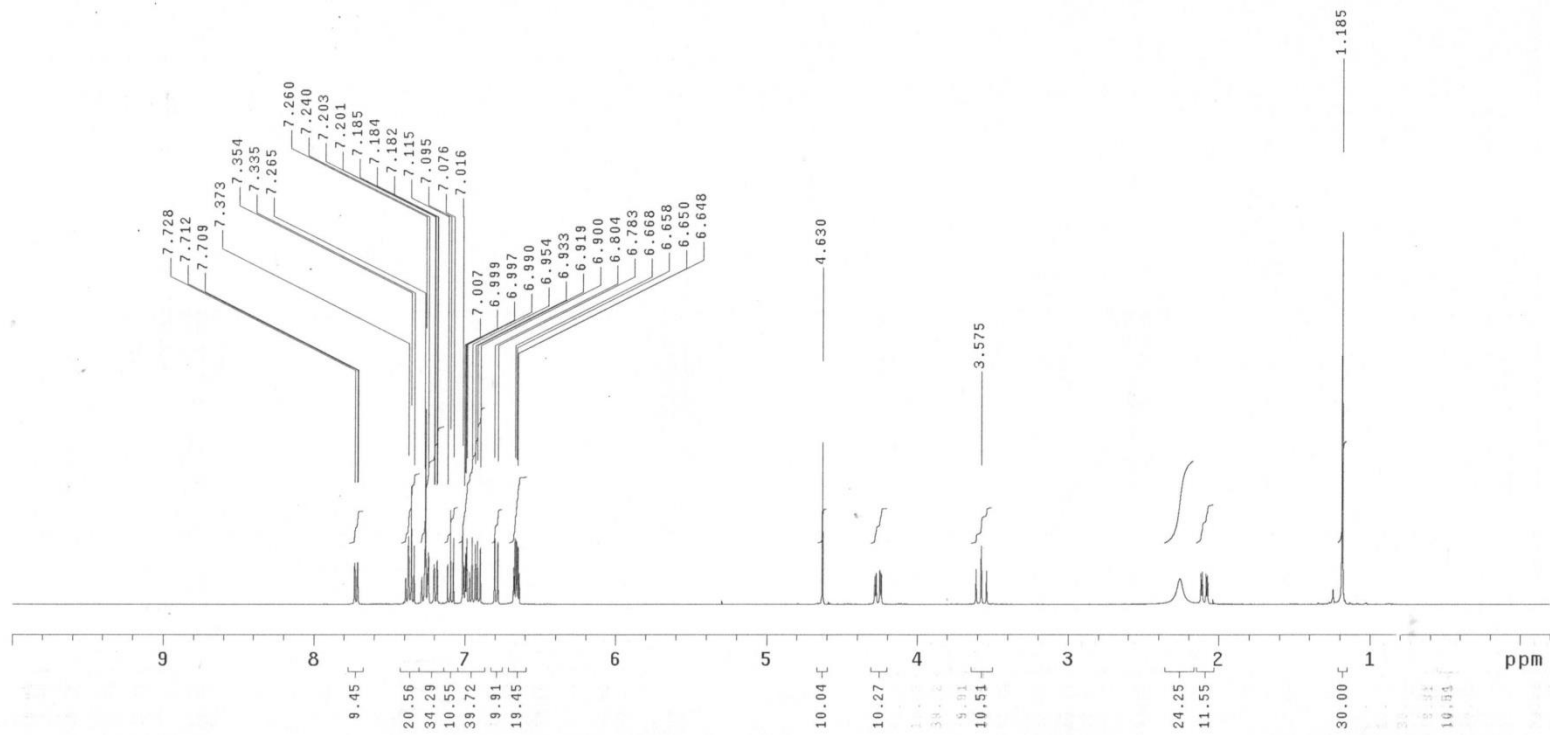

# Compound 3y-1 (<sup>13</sup>C-NMR spectral data)

KT6PC93

Pulse Sequence: s2pu1  
UNITYplus-400 "unity400"  
Date: Oct 7 2019  
Solvent: CDCl<sub>3</sub>  
Ambient temperature  
Total 3248 repetitions

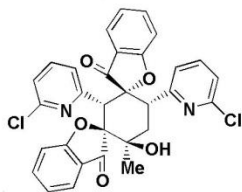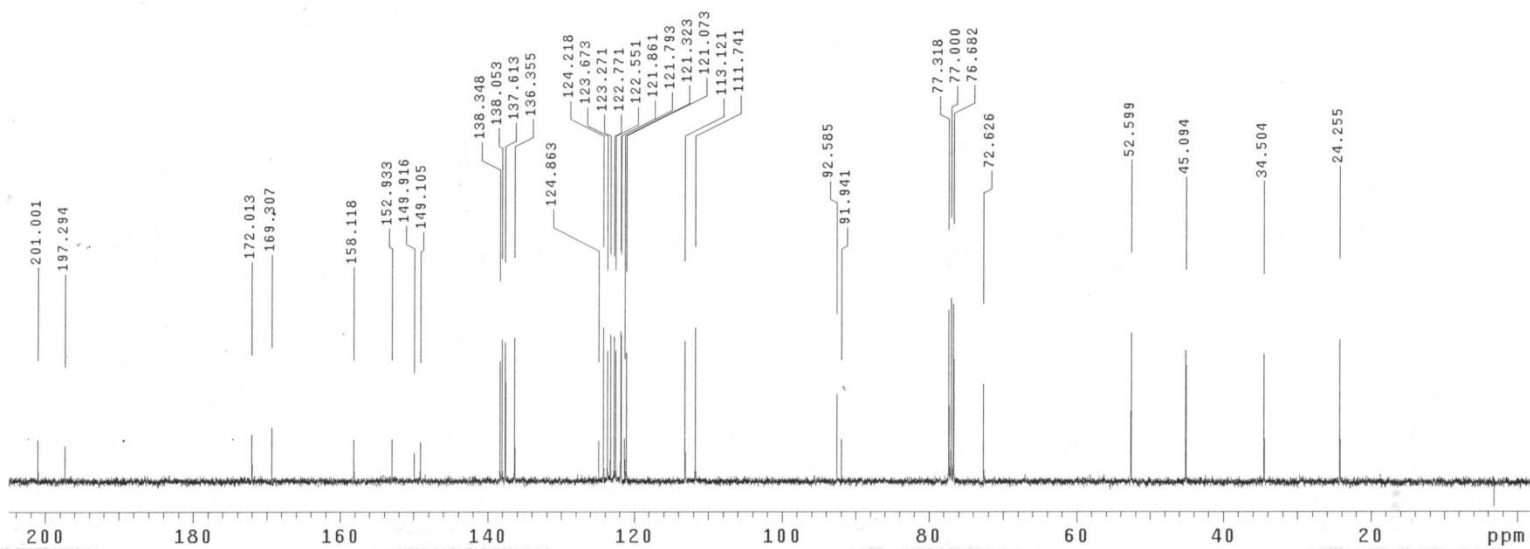

# Compound 3y-2 (<sup>1</sup>H-NMR spectral data)

KT6PC104  
Pulse Sequence: s2pu1  
UNITYplus-400 "unity400"  
Date: Oct 14 2019  
Solvent: CDCl3  
Ambient temperature  
Total 32 repetitions

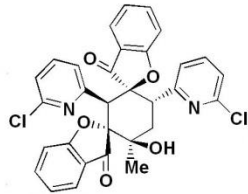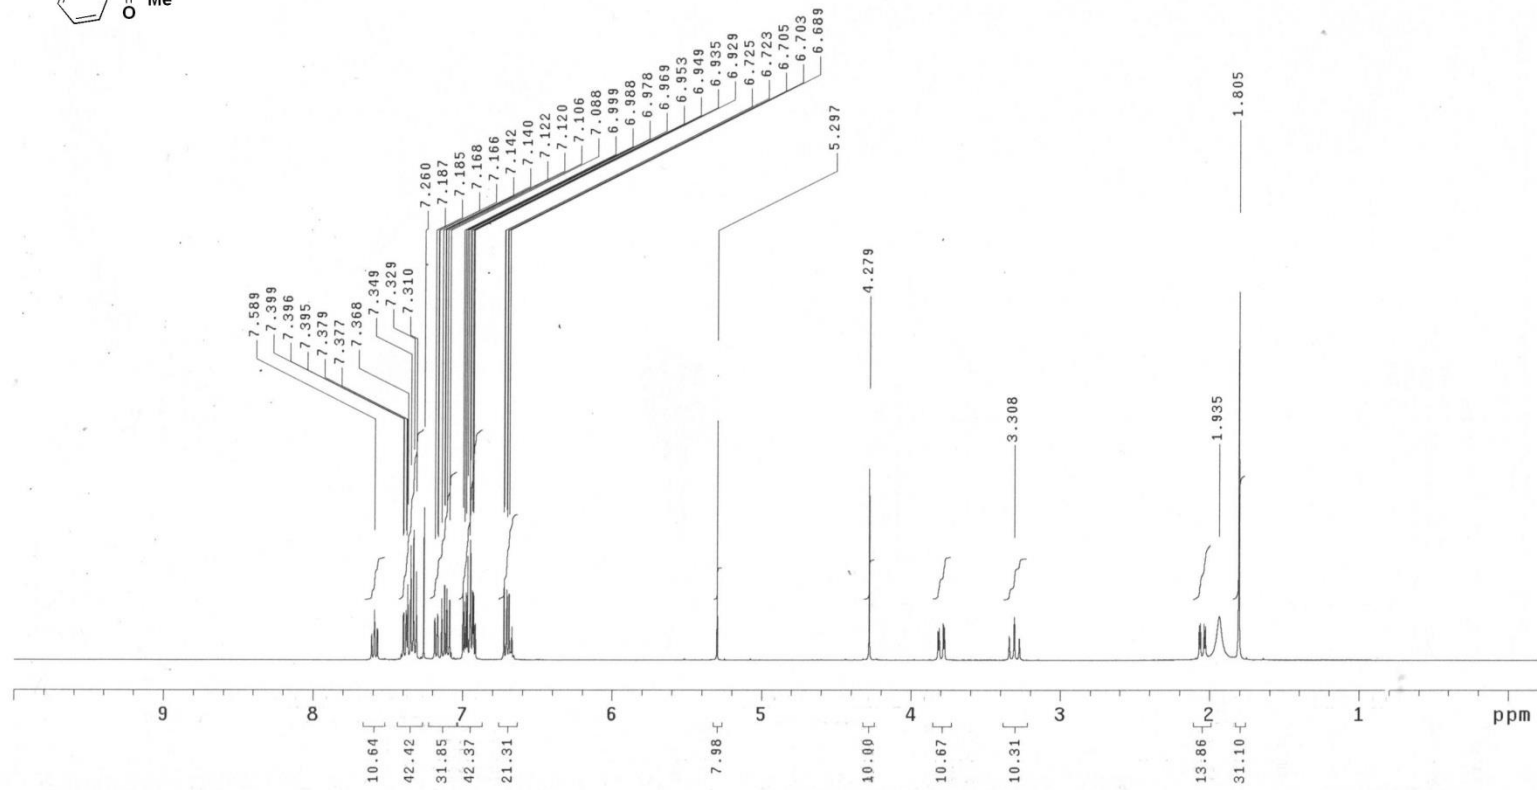

# Compound 3y-2 (<sup>13</sup>C-NMR spectral data)

KT6PC104

Pulse Sequence: s2pu1  
UNITYplus-400 "unity400"  
Date: Oct 14 2019  
Solvent: CDCl<sub>3</sub>  
Ambient temperature  
Total 2432 repetitions

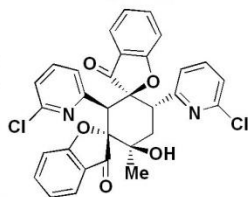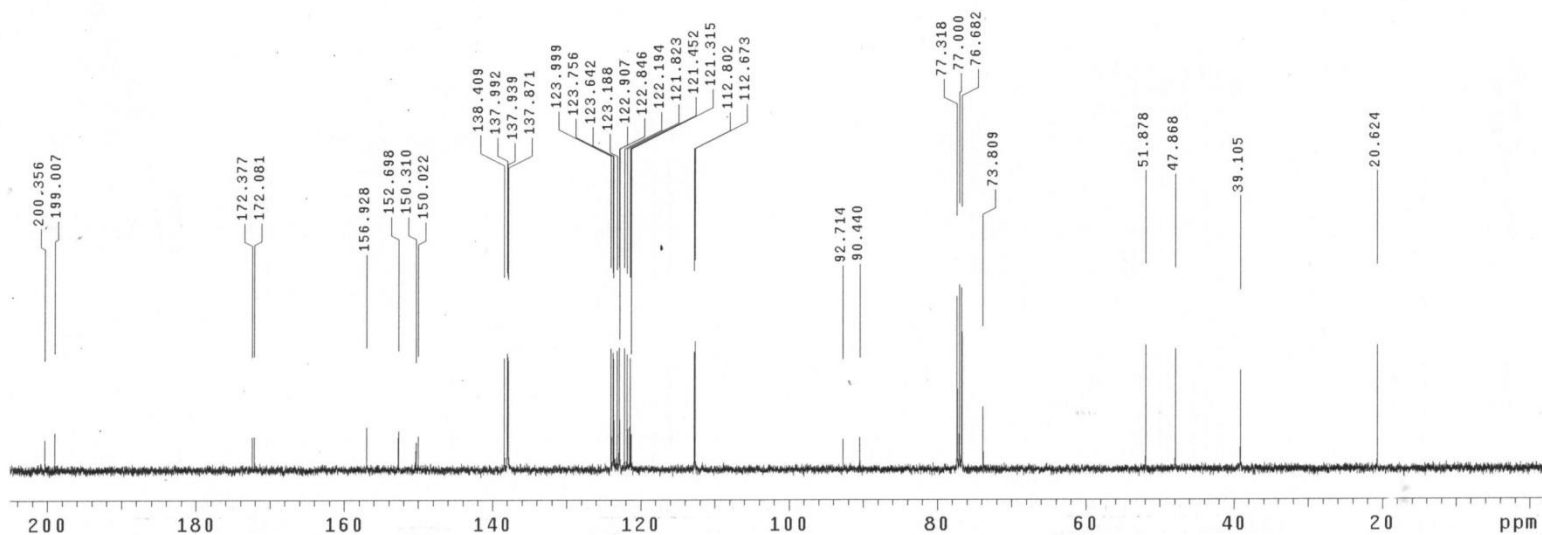



## X-ray crystal data of compound 2a (CCDC 1965985)

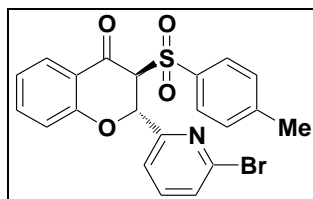

**Sample preparation** : A solution of compound **2a** (30 mg) in CH<sub>2</sub>Cl<sub>2</sub> (10 mL) was placed in a tube (10 mL). EtOAc (2 mL) was added slowly to the vial with a dropper. The vial was closed with little cotton and kept at room temperature for 2 days. Then, colorless prisms were observed.

**Crystal measurement** : X-ray crystal structures were determined with a Bruker Enraf-Nonius single-crystal diffractometer (CAD4, Kappa CCD). Thermal ellipsoids are drawn at 50% probability level.

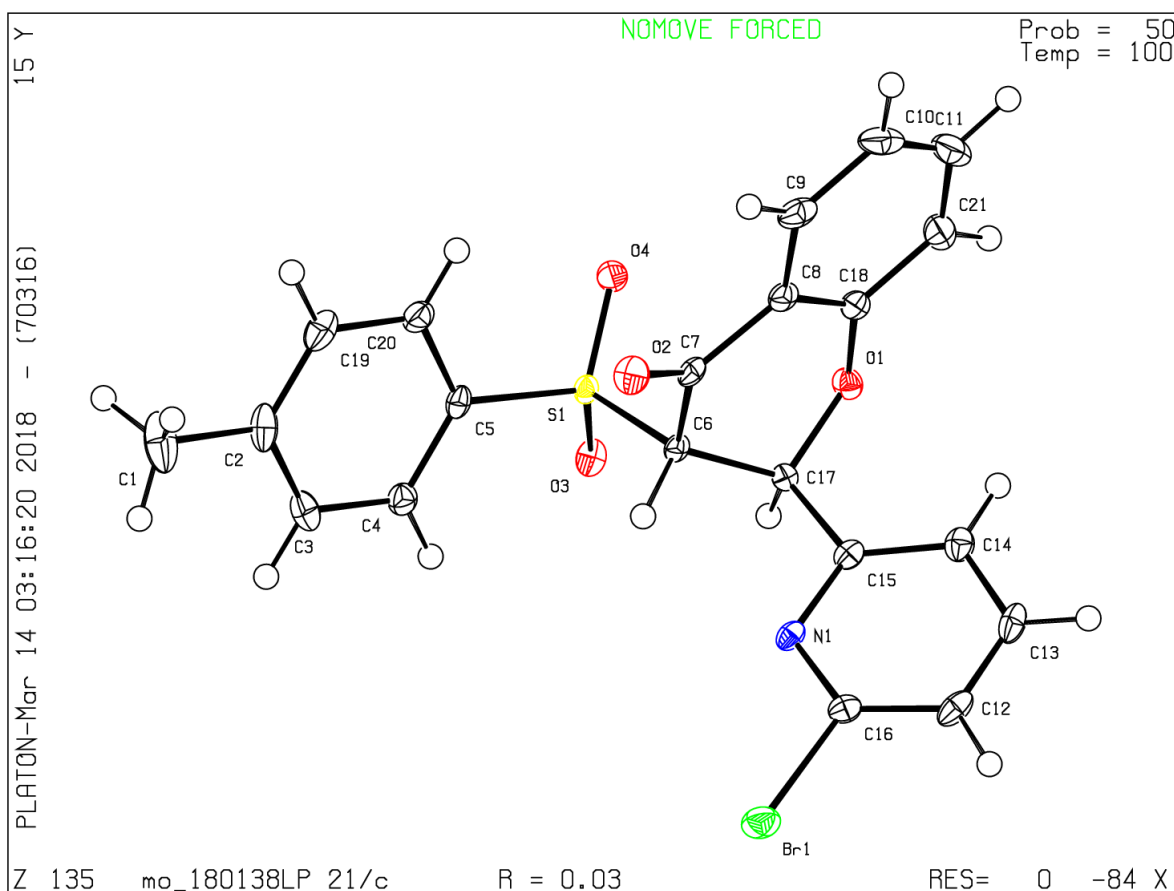

|                                   |                                                       |                 |
|-----------------------------------|-------------------------------------------------------|-----------------|
| Empirical formula                 | C <sub>21</sub> H <sub>16</sub> Br N O <sub>4</sub> S |                 |
| Formula weight                    | 458.32                                                |                 |
| Temperature                       | 100(2) K                                              |                 |
| Wavelength                        | 0.71073 Å                                             |                 |
| Crystal system                    | Monoclinic                                            |                 |
| Space group                       | P 2 <sub>1</sub> /c                                   |                 |
| Unit cell dimensions              | a = 8.2647(4) Å                                       | α = 90°.        |
|                                   | b = 19.7204(11) Å                                     | β = 95.308(2)°. |
|                                   | c = 11.6058(6) Å                                      | γ = 90°.        |
| Volume                            | 1883.44(17) Å <sup>3</sup>                            |                 |
| Z                                 | 4                                                     |                 |
| Density (calculated)              | 1.616 Mg/m <sup>3</sup>                               |                 |
| Absorption coefficient            | 2.322 mm <sup>-1</sup>                                |                 |
| F(000)                            | 928                                                   |                 |
| Crystal size                      | 0.20 x 0.18 x 0.17 mm <sup>3</sup>                    |                 |
| Theta range for data collection   | 2.043 to 26.697°.                                     |                 |
| Index ranges                      | -10 ≤ h ≤ 10, -24 ≤ k ≤ 23, -14 ≤ l ≤ 14              |                 |
| Reflections collected             | 30351                                                 |                 |
| Independent reflections           | 3930 [R(int) = 0.0460]                                |                 |
| Completeness to theta = 25.242°   | 100.0 %                                               |                 |
| Absorption correction             | Semi-empirical from equivalents                       |                 |
| Max. and min. transmission        | 0.9485 and 0.8806                                     |                 |
| Refinement method                 | Full-matrix least-squares on F <sup>2</sup>           |                 |
| Data / restraints / parameters    | 3930 / 0 / 254                                        |                 |
| Goodness-of-fit on F <sup>2</sup> | 1.041                                                 |                 |
| Final R indices [I > 2σ(I)]       | R <sub>1</sub> = 0.0278, wR <sub>2</sub> = 0.0598     |                 |
| R indices (all data)              | R <sub>1</sub> = 0.0372, wR <sub>2</sub> = 0.0629     |                 |
| Extinction coefficient            | n/a                                                   |                 |
| Largest diff. peak and hole       | 0.438 and -0.388 e.Å <sup>-3</sup>                    |                 |

## X-ray crystal data of compound 3a (CCDC 1965986)

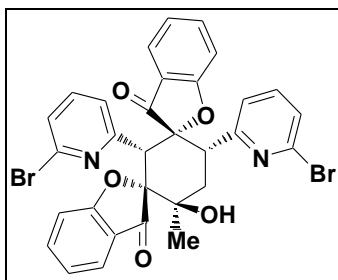

**Sample preparation** : A solution of compound **3a** (30 mg) in CH<sub>2</sub>Cl<sub>2</sub> (10 mL) was placed in a tube (10 mL). EtOAc (2 mL) was added slowly to the vial with a dropper. The vial was closed with little cotton and kept at room temperature for 2 days. Then, colorless prisms were observed.

**Crystal measurement** : X-ray crystal structures were determined with a Bruker Enraf-Nonius single-crystal diffractometer (CAD4, Kappa CCD). Thermal ellipsoids are drawn at 50% probability level.

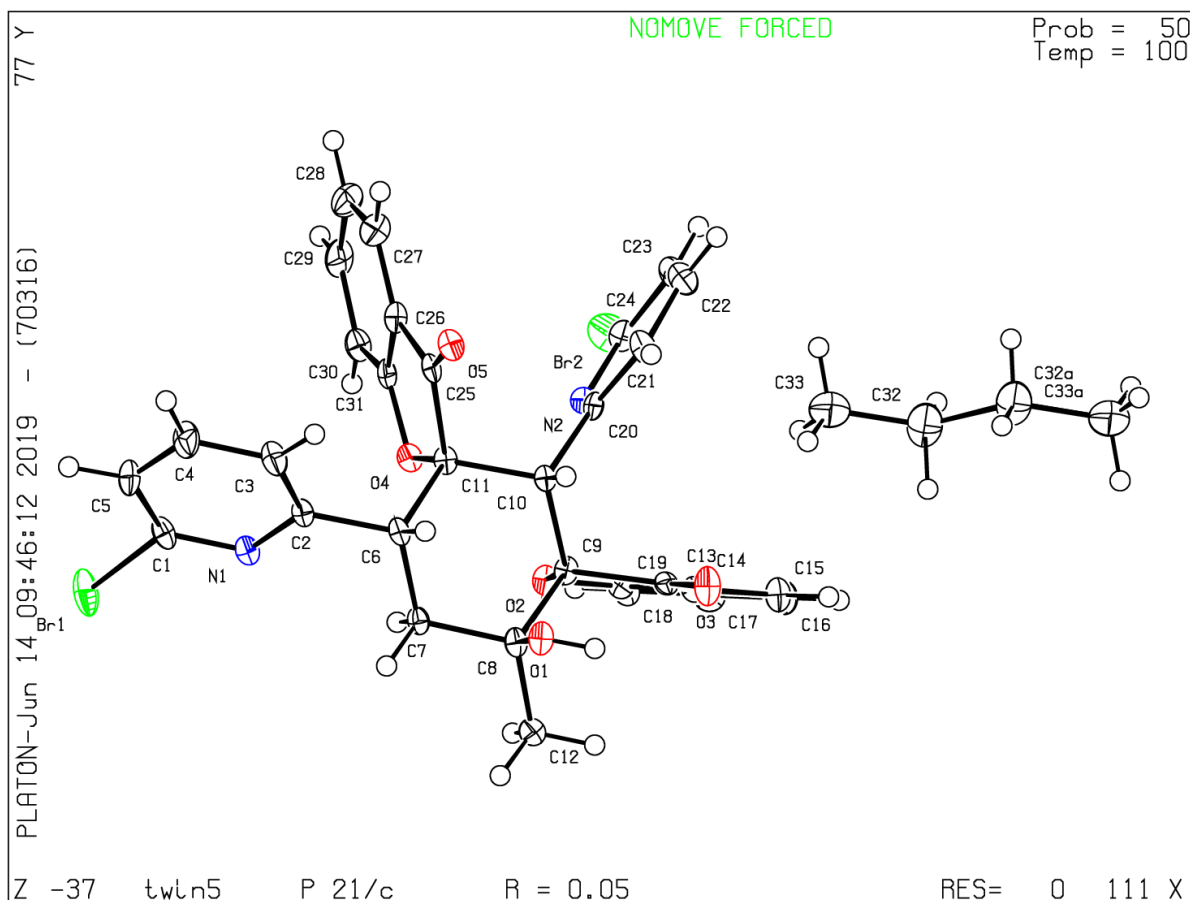

|                                   |                                                                                                            |
|-----------------------------------|------------------------------------------------------------------------------------------------------------|
| Empirical formula                 | C33 H27 Br2 N2 O5                                                                                          |
| Formula weight                    | 691.38                                                                                                     |
| Temperature                       | 100(2) K                                                                                                   |
| Wavelength                        | 0.71073 Å                                                                                                  |
| Crystal system                    | Monoclinic                                                                                                 |
| Space group                       | P2 <sub>1</sub> /c                                                                                         |
| Unit cell dimensions              | a = 13.1453(16) Å      α = 90°.<br>b = 12.9849(18) Å      β = 96.328(5)°.<br>c = 16.874(3) Å      γ = 90°. |
| Volume                            | 2862.6(7) Å <sup>3</sup>                                                                                   |
| Z                                 | 4                                                                                                          |
| Density (calculated)              | 1.604 Mg/m <sup>3</sup>                                                                                    |
| Absorption coefficient            | 2.878 mm <sup>-1</sup>                                                                                     |
| F(000)                            | 1396                                                                                                       |
| Crystal size                      | 0.22 x 0.20 x 0.19 mm <sup>3</sup>                                                                         |
| Theta range for data collection   | 1.559 to 26.494°.                                                                                          |
| Index ranges                      | -16 ≤ h ≤ 16, 0 ≤ k ≤ 16, 0 ≤ l ≤ 21                                                                       |
| Reflections collected             | 6408                                                                                                       |
| Independent reflections           | 6408 [R(int) = 0.0719]                                                                                     |
| Completeness to theta = 25.242°   | 99.5 %                                                                                                     |
| Absorption correction             | Semi-empirical from equivalents                                                                            |
| Max. and min. transmission        | 0.7454 and 0.5536                                                                                          |
| Refinement method                 | Full-matrix least-squares on F <sup>2</sup>                                                                |
| Data / restraints / parameters    | 6408 / 366 / 383                                                                                           |
| Goodness-of-fit on F <sup>2</sup> | 1.043                                                                                                      |
| Final R indices [I > 2σ(I)]       | R1 = 0.0504, wR2 = 0.1123                                                                                  |
| R indices (all data)              | R1 = 0.1029, wR2 = 0.1318                                                                                  |
| Extinction coefficient            | n/a                                                                                                        |
| Largest diff. peak and hole       | 0.941 and -0.845 e.Å <sup>-3</sup>                                                                         |

## X-ray crystal data of compound 3i (CCDC 1965987)

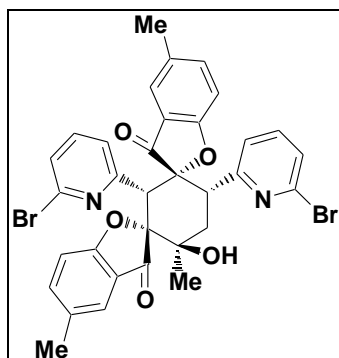

**Sample preparation :** A solution of compound **3i** (30 mg) in CH<sub>2</sub>Cl<sub>2</sub> (10 mL) was placed in a tube (10 mL). EtOAc (2 mL) was added slowly to the vial with a dropper. The vial was closed with little cotton and kept at room temperature for 2 days. Then, colorless prisms were observed.

**Crystal measurement :** X-ray crystal structures were determined with a Bruker Enraf-Nonius single-crystal diffractometer (CAD4, Kappa CCD). Thermal ellipsoids are drawn at 50% probability level.

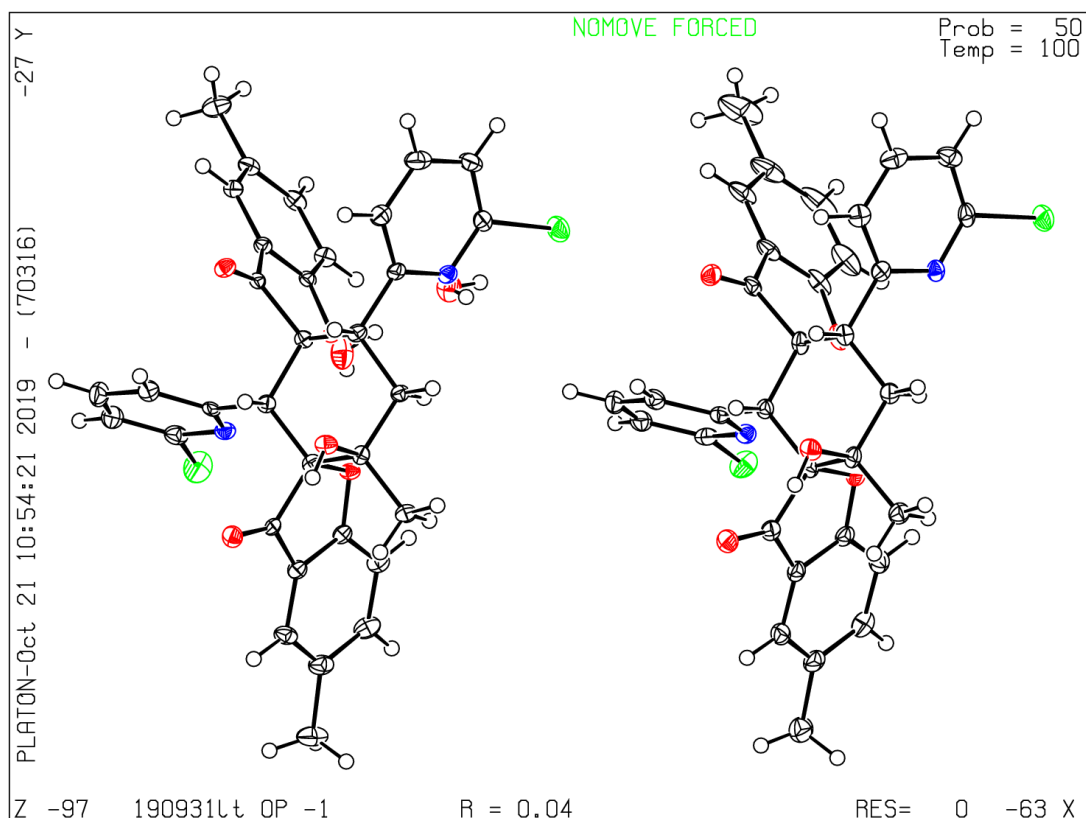

|                                   |                                             |                              |
|-----------------------------------|---------------------------------------------|------------------------------|
| Empirical formula                 | C66 H56 Br4 N4 O12                          |                              |
| Formula weight                    | 1416.78                                     |                              |
| Temperature                       | 100(2) K                                    |                              |
| Wavelength                        | 0.71073 Å                                   |                              |
| Crystal system                    | Triclinic                                   |                              |
| Space group                       | P-1                                         |                              |
| Unit cell dimensions              | a = 13.3171(6) Å                            | $\alpha = 77.235(2)^\circ$ . |
|                                   | b = 15.1045(7) Å                            | $\beta = 76.167(2)^\circ$ .  |
|                                   | c = 16.7543(6) Å                            | $\gamma = 67.821(3)^\circ$ . |
| Volume                            | 2998.0(2) Å <sup>3</sup>                    |                              |
| Z                                 | 2                                           |                              |
| Density (calculated)              | 1.569 Mg/m <sup>3</sup>                     |                              |
| Absorption coefficient            | 2.753 mm <sup>-1</sup>                      |                              |
| F(000)                            | 1432                                        |                              |
| Crystal size                      | 0.10 x 0.08 x 0.08 mm <sup>3</sup>          |                              |
| Theta range for data collection   | 1.265 to 26.434°.                           |                              |
| Index ranges                      | -16<=h<=16, -18<=k<=18, -20<=l<=20          |                              |
| Reflections collected             | 46340                                       |                              |
| Independent reflections           | 12292 [R(int) = 0.0439]                     |                              |
| Completeness to theta = 25.242°   | 100.0 %                                     |                              |
| Absorption correction             | Semi-empirical from equivalents             |                              |
| Max. and min. transmission        | 0.7454 and 0.6801                           |                              |
| Refinement method                 | Full-matrix least-squares on F <sup>2</sup> |                              |
| Data / restraints / parameters    | 12292 / 6 / 799                             |                              |
| Goodness-of-fit on F <sup>2</sup> | 1.023                                       |                              |
| Final R indices [I>2sigma(I)]     | R1 = 0.0376, wR2 = 0.0805                   |                              |
| R indices (all data)              | R1 = 0.0597, wR2 = 0.0879                   |                              |
| Extinction coefficient            | n/a                                         |                              |
| Largest diff. peak and hole       | 0.880 and -1.097 e.Å <sup>-3</sup>          |                              |

## X-ray crystal data of compound 3j (CCDC 1965988)

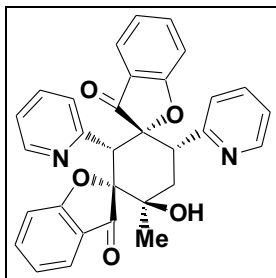

**Sample preparation** : A solution of compound **3j** (30 mg) in CH<sub>2</sub>Cl<sub>2</sub> (10 mL) was placed in a tube (10 mL). EtOAc (2 mL) was added slowly to the vial with a dropper. The vial was closed with little cotton and kept at room temperature for 2 days. Then, colorless prisms were observed.

**Crystal measurement** : X-ray crystal structures were determined with a Bruker Enraf-Nonius single-crystal diffractometer (CAD4, Kappa CCD). Thermal ellipsoids are drawn at 50% probability level.

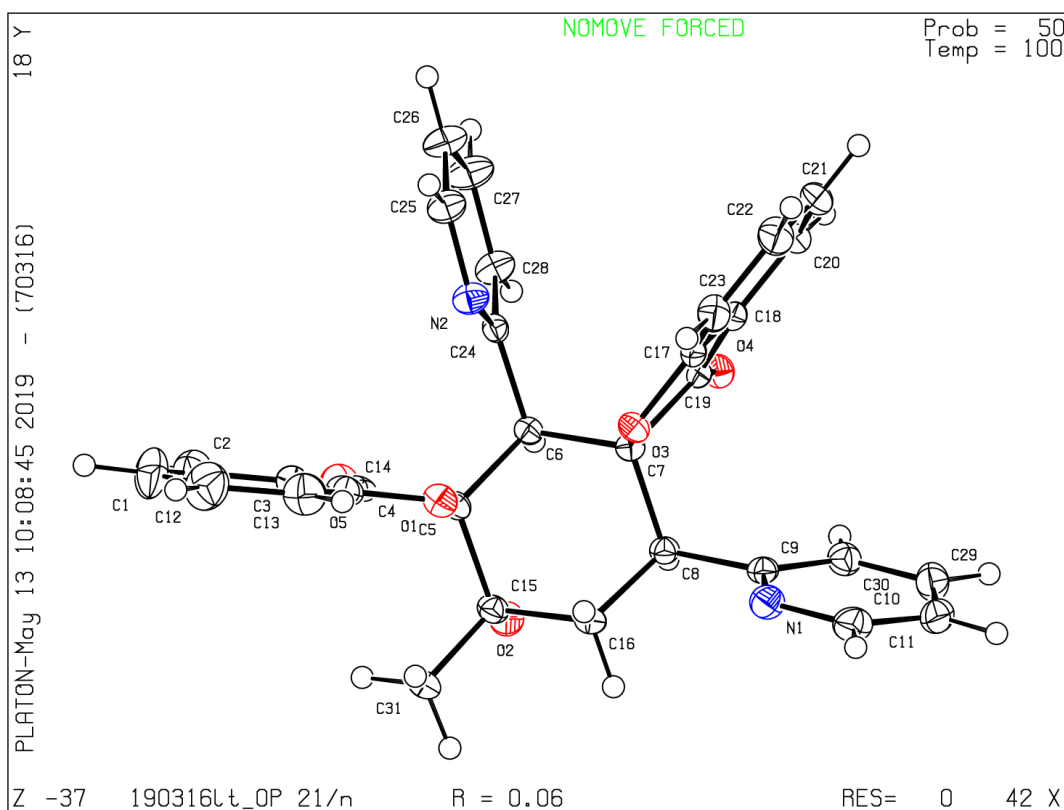

|                                   |                                                                                                         |
|-----------------------------------|---------------------------------------------------------------------------------------------------------|
| Empirical formula                 | C31 H23 N2 O5                                                                                           |
| Formula weight                    | 503.51                                                                                                  |
| Temperature                       | 100(2) K                                                                                                |
| Wavelength                        | 0.71073 Å                                                                                               |
| Crystal system                    | Monoclinic                                                                                              |
| Space group                       | P2 <sub>1</sub> /n                                                                                      |
| Unit cell dimensions              | a = 11.8834(7) Å      α = 90°.<br>b = 8.8469(5) Å      β = 91.109(2)°.<br>c = 23.6723(12) Å    γ = 90°. |
| Volume                            | 2488.2(2) Å <sup>3</sup>                                                                                |
| Z                                 | 4                                                                                                       |
| Density (calculated)              | 1.344 Mg/m <sup>3</sup>                                                                                 |
| Absorption coefficient            | 0.092 mm <sup>-1</sup>                                                                                  |
| F(000)                            | 1052                                                                                                    |
| Crystal size                      | 0.20 x 0.18 x 0.16 mm <sup>3</sup>                                                                      |
| Theta range for data collection   | 1.903 to 26.396°.                                                                                       |
| Index ranges                      | -14<=h<=14, -11<=k<=10, -26<=l<=29                                                                      |
| Reflections collected             | 20298                                                                                                   |
| Independent reflections           | 5099 [R(int) = 0.0314]                                                                                  |
| Completeness to theta = 25.242°   | 99.9 %                                                                                                  |
| Absorption correction             | Semi-empirical from equivalents                                                                         |
| Max. and min. transmission        | 0.7454 and 0.7087                                                                                       |
| Refinement method                 | Full-matrix least-squares on F <sup>2</sup>                                                             |
| Data / restraints / parameters    | 5099 / 0 / 344                                                                                          |
| Goodness-of-fit on F <sup>2</sup> | 1.034                                                                                                   |
| Final R indices [I>2sigma(I)]     | R1 = 0.0571, wR2 = 0.1530                                                                               |
| R indices (all data)              | R1 = 0.0692, wR2 = 0.1635                                                                               |
| Extinction coefficient            | n/a                                                                                                     |
| Largest diff. peak and hole       | 1.466 and -0.378 e.Å <sup>-3</sup>                                                                      |



## X-ray crystal data of compound 3o (CCDC 1965996)

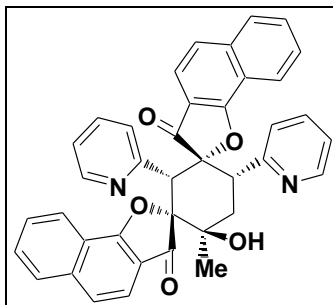

**Sample preparation :** A solution of compound **3o** (30 mg) in CH<sub>2</sub>Cl<sub>2</sub> (10 mL) was placed in a tube (10 mL). EtOAc (2 mL) was added slowly to the vial with a dropper. The vial was closed with little cotton and kept at room temperature for 2 days. Then, colorless prisms were observed.

**Crystal measurement :** X-ray crystal structures were determined with a Bruker Enraf-Nonius single-crystal diffractometer (CAD4, Kappa CCD). Thermal ellipsoids are drawn at 50% probability level.

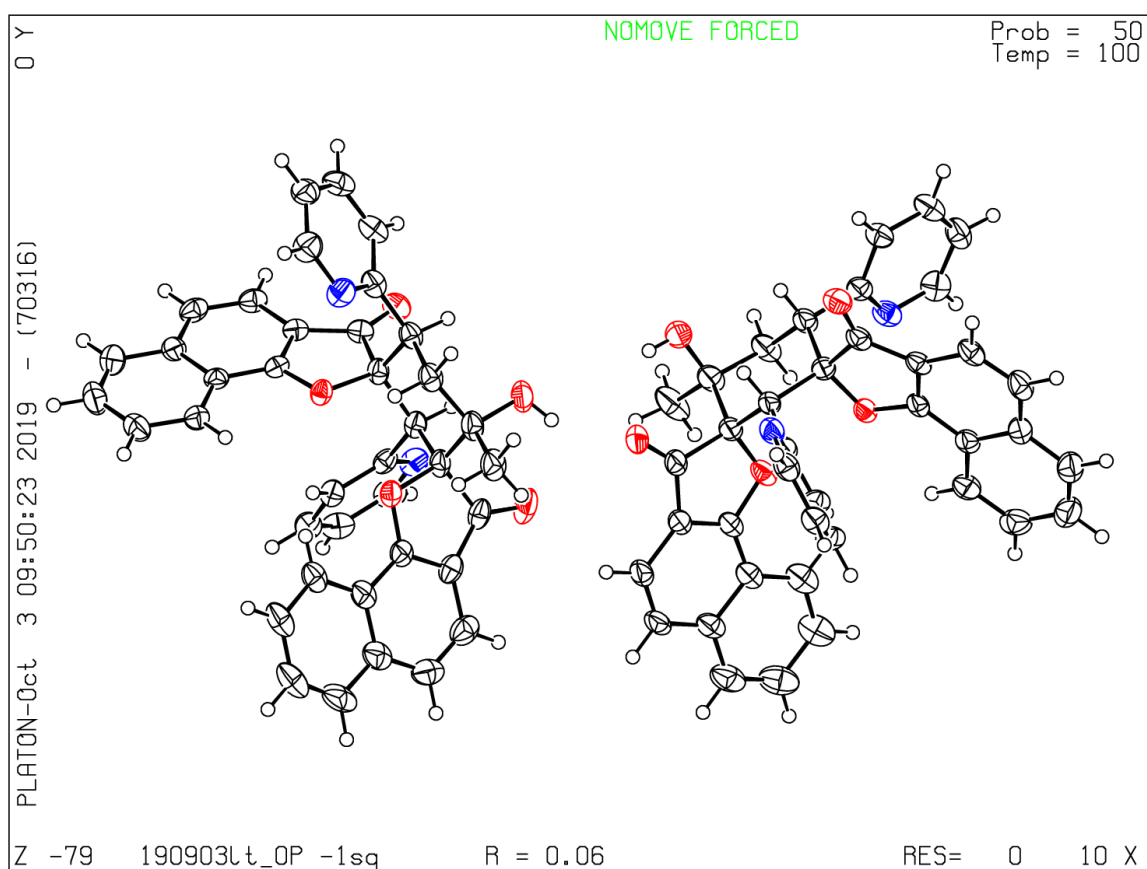

|                                   |                                             |                              |
|-----------------------------------|---------------------------------------------|------------------------------|
| Empirical formula                 | C39 H28 N2 O5                               |                              |
| Formula weight                    | 604.63                                      |                              |
| Temperature                       | 100(2) K                                    |                              |
| Wavelength                        | 0.71073 Å                                   |                              |
| Crystal system                    | Triclinic                                   |                              |
| Space group                       | P-1                                         |                              |
| Unit cell dimensions              | a = 13.8900(7) Å                            | $\alpha = 64.295(2)^\circ$ . |
|                                   | b = 16.8786(9) Å                            | $\beta = 88.306(2)^\circ$ .  |
|                                   | c = 17.2527(9) Å                            | $\gamma = 73.213(2)^\circ$ . |
| Volume                            | 3467.7(3) Å <sup>3</sup>                    |                              |
| Z                                 | 4                                           |                              |
| Density (calculated)              | 1.158 Mg/m <sup>3</sup>                     |                              |
| Absorption coefficient            | 0.077 mm <sup>-1</sup>                      |                              |
| F(000)                            | 1264                                        |                              |
| Crystal size                      | 0.18 x 0.16 x 0.15 mm <sup>3</sup>          |                              |
| Theta range for data collection   | 1.318 to 26.437°.                           |                              |
| Index ranges                      | -17<=h<=16, -21<=k<=21, -21<=l<=21          |                              |
| Reflections collected             | 53940                                       |                              |
| Independent reflections           | 14196 [R(int) = 0.0435]                     |                              |
| Completeness to theta = 25.242°   | 99.7 %                                      |                              |
| Absorption correction             | Semi-empirical from equivalents             |                              |
| Max. and min. transmission        | 0.7454 and 0.6755                           |                              |
| Refinement method                 | Full-matrix least-squares on F <sup>2</sup> |                              |
| Data / restraints / parameters    | 14196 / 0 / 833                             |                              |
| Goodness-of-fit on F <sup>2</sup> | 1.039                                       |                              |
| Final R indices [I>2sigma(I)]     | R1 = 0.0572, wR2 = 0.1346                   |                              |
| R indices (all data)              | R1 = 0.0901, wR2 = 0.1558                   |                              |
| Extinction coefficient            | n/a                                         |                              |
| Largest diff. peak and hole       | 0.268 and -0.251 e.Å <sup>-3</sup>          |                              |

## X-ray crystal data of compound 3r (CCDC 1965997)

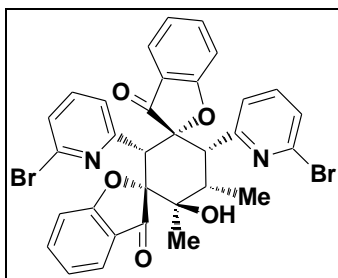

**Sample preparation** : A solution of compound **3r** (30 mg) in  $\text{CHCl}_3$  (10 mL) was placed in a tube (10 mL). EtOAc (2 mL) was added slowly to the vial with a dropper. The vial was closed with little cotton and kept at room temperature for 2 days. Then, colorless prisms were observed.

**Crystal measurement** : X-ray crystal structures were determined with a Bruker Enraf-Nonius single-crystal diffractometer (CAD4, Kappa CCD). Thermal ellipsoids are drawn at 50% probability level.

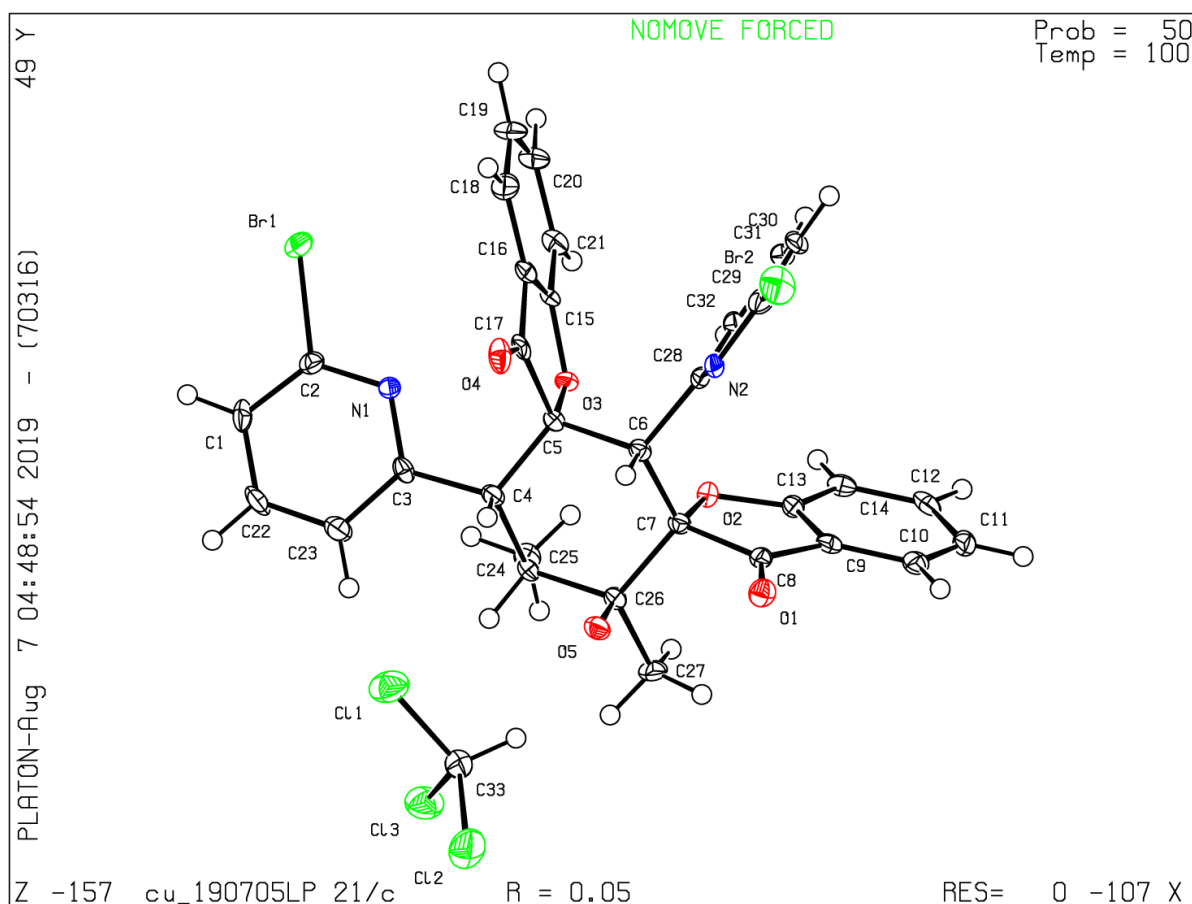

|                                   |                                             |                    |
|-----------------------------------|---------------------------------------------|--------------------|
| Empirical formula                 | C33 H24 Br2 Cl3 N2 O5                       |                    |
| Formula weight                    | 794.71                                      |                    |
| Temperature                       | 100(2) K                                    |                    |
| Wavelength                        | 1.54178 Å                                   |                    |
| Crystal system                    | Monoclinic                                  |                    |
| Space group                       | P2 <sub>1</sub> /c                          |                    |
| Unit cell dimensions              | a = 10.5330(4) Å                            | α = 90°.           |
|                                   | b = 26.8610(11) Å                           | β = 115.3340(10)°. |
|                                   | c = 12.2233(5) Å                            | γ = 90°.           |
| Volume                            | 3125.7(2) Å <sup>3</sup>                    |                    |
| Z                                 | 4                                           |                    |
| Density (calculated)              | 1.689 Mg/m <sup>3</sup>                     |                    |
| Absorption coefficient            | 6.036 mm <sup>-1</sup>                      |                    |
| F(000)                            | 1588                                        |                    |
| Crystal size                      | 0.15 x 0.13 x 0.12 mm <sup>3</sup>          |                    |
| Theta range for data collection   | 3.290 to 66.562°.                           |                    |
| Index ranges                      | -12<=h<=12, -31<=k<=26, -12<=l<=14          |                    |
| Reflections collected             | 13631                                       |                    |
| Independent reflections           | 5087 [R(int) = 0.0429]                      |                    |
| Completeness to theta = 67.679°   | 89.8 %                                      |                    |
| Absorption correction             | Semi-empirical from equivalents             |                    |
| Max. and min. transmission        | 0.7528 and 0.4490                           |                    |
| Refinement method                 | Full-matrix least-squares on F <sup>2</sup> |                    |
| Data / restraints / parameters    | 5087 / 0 / 408                              |                    |
| Goodness-of-fit on F <sup>2</sup> | 1.120                                       |                    |
| Final R indices [I>2sigma(I)]     | R1 = 0.0518, wR2 = 0.1341                   |                    |
| R indices (all data)              | R1 = 0.0531, wR2 = 0.1430                   |                    |
| Extinction coefficient            | n/a                                         |                    |
| Largest diff. peak and hole       | 1.171 and -1.191 e.Å <sup>-3</sup>          |                    |

## X-ray crystal data of compound 3y (CCDC 1965998)

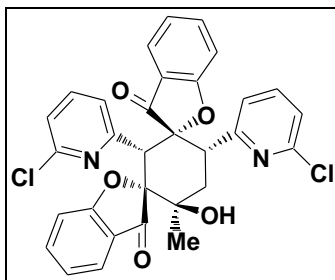

**Sample preparation** : A solution of compound **3y** (30 mg) in CH<sub>2</sub>Cl<sub>2</sub> (10 mL) was placed in a tube (10 mL). EtOAc (2 mL) was added slowly to the vial with a dropper. The vial was closed with little cotton and kept at room temperature for 2 days. Then, colorless prisms were observed.

**Crystal measurement** : X-ray crystal structures were determined with a Bruker Enraf-Nonius single-crystal diffractometer (CAD4, Kappa CCD). Thermal ellipsoids are drawn at 50% probability level.

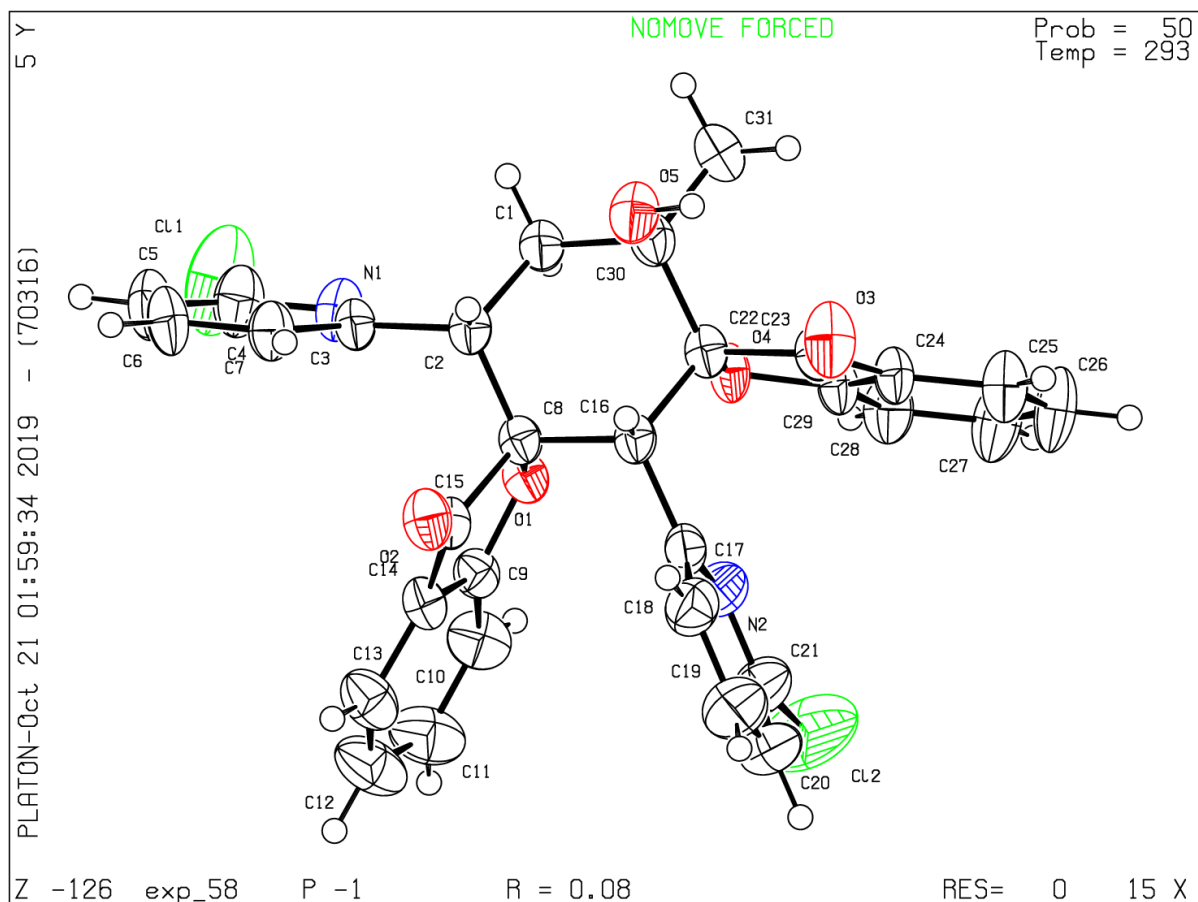

|                                   |                                             |                              |
|-----------------------------------|---------------------------------------------|------------------------------|
| Empirical formula                 | C31 H22 Cl2 N2 O5                           |                              |
| Formula weight                    | 573.40                                      |                              |
| Temperature                       | 293(2) K                                    |                              |
| Wavelength                        | 0.71073 Å                                   |                              |
| Crystal system                    | Triclinic                                   |                              |
| Space group                       | P-1                                         |                              |
| Unit cell dimensions              | a = 10.8001(6) Å                            | $\alpha = 89.110(4)^\circ$ . |
|                                   | b = 11.3693(6) Å                            | $\beta = 67.910(4)^\circ$ .  |
|                                   | c = 13.4193(5) Å                            | $\gamma = 68.542(5)^\circ$ . |
| Volume                            | 1406.67(13) Å <sup>3</sup>                  |                              |
| Z                                 | 2                                           |                              |
| Density (calculated)              | 1.354 Mg/m <sup>3</sup>                     |                              |
| Absorption coefficient            | 0.274 mm <sup>-1</sup>                      |                              |
| F(000)                            | 592                                         |                              |
| Crystal size                      | 0.2 x 0.2 x 0.2 mm <sup>3</sup>             |                              |
| Theta range for data collection   | 2.169 to 27.038°.                           |                              |
| Index ranges                      | -13<=h<=12, -13<=k<=14, -17<=l<=16          |                              |
| Reflections collected             | 19610                                       |                              |
| Independent reflections           | 5795 [R(int) = 0.0493]                      |                              |
| Completeness to theta = 25.242°   | 99.7 %                                      |                              |
| Absorption correction             | Semi-empirical from equivalents             |                              |
| Max. and min. transmission        | 1.00000 and 0.55616                         |                              |
| Refinement method                 | Full-matrix least-squares on F <sup>2</sup> |                              |
| Data / restraints / parameters    | 5795 / 12 / 363                             |                              |
| Goodness-of-fit on F <sup>2</sup> | 1.063                                       |                              |
| Final R indices [I>2sigma(I)]     | R1 = 0.0846, wR2 = 0.2025                   |                              |
| R indices (all data)              | R1 = 0.1426, wR2 = 0.2297                   |                              |
| Extinction coefficient            | n/a                                         |                              |
| Largest diff. peak and hole       | 0.822 and -0.419 e.Å <sup>-3</sup>          |                              |

## X-ray crystal data of compound 3y-1 (CCDC 1965999)

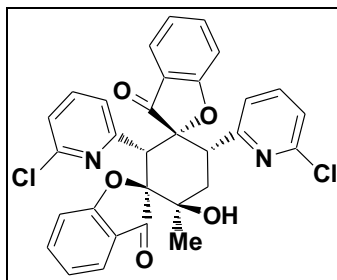

**Sample preparation** : A solution of compound **3y-1** (30 mg) in CH<sub>2</sub>Cl<sub>2</sub> (10 mL) was placed in a tube (10 mL). EtOAc (2 mL) was added slowly to the vial with a dropper. The vial was closed with little cotton and kept at room temperature for 2 days. Then, colorless prisms were observed.

**Crystal measurement** : X-ray crystal structures were determined with a Bruker Enraf-Nonius single-crystal diffractometer (CAD4, Kappa CCD). Thermal ellipsoids are drawn at 50% probability level.

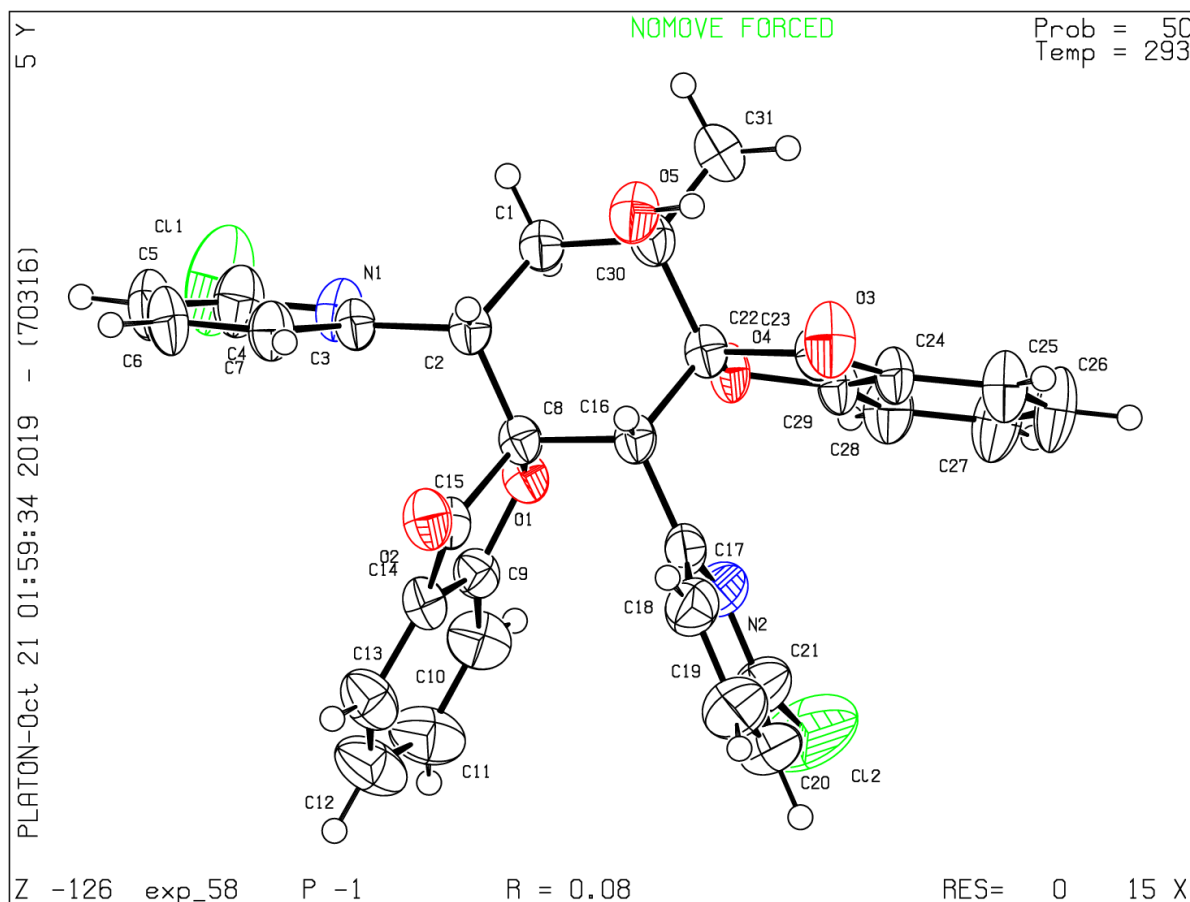

|                                   |                                             |                               |
|-----------------------------------|---------------------------------------------|-------------------------------|
| Empirical formula                 | C31 H22 Cl2 N2 O5                           |                               |
| Formula weight                    | 573.40                                      |                               |
| Temperature                       | 293(2) K                                    |                               |
| Wavelength                        | 0.71073 Å                                   |                               |
| Crystal system                    | Triclinic                                   |                               |
| Space group                       | P-1                                         |                               |
| Unit cell dimensions              | a = 10.9174(14) Å                           | $\alpha = 69.112(11)^\circ$ . |
|                                   | b = 11.9111(14) Å                           | $\beta = 87.877(10)^\circ$ .  |
|                                   | c = 12.3891(14) Å                           | $\gamma = 65.530(12)^\circ$ . |
| Volume                            | 1358.3(3) Å <sup>3</sup>                    |                               |
| Z                                 | 2                                           |                               |
| Density (calculated)              | 1.402 Mg/m <sup>3</sup>                     |                               |
| Absorption coefficient            | 0.284 mm <sup>-1</sup>                      |                               |
| F(000)                            | 592                                         |                               |
| Crystal size                      | 0.2 x 0.2 x 0.2 mm <sup>3</sup>             |                               |
| Theta range for data collection   | 2.026 to 27.091°.                           |                               |
| Index ranges                      | -9<=h<=13, -15<=k<=14, -15<=l<=15           |                               |
| Reflections collected             | 17787                                       |                               |
| Independent reflections           | 5593 [R(int) = 0.1441]                      |                               |
| Completeness to theta = 25.242°   | 99.6 %                                      |                               |
| Absorption correction             | Semi-empirical from equivalents             |                               |
| Max. and min. transmission        | 1.00000 and 0.47499                         |                               |
| Refinement method                 | Full-matrix least-squares on F <sup>2</sup> |                               |
| Data / restraints / parameters    | 5593 / 198 / 363                            |                               |
| Goodness-of-fit on F <sup>2</sup> | 1.014                                       |                               |
| Final R indices [I>2sigma(I)]     | R1 = 0.1112, wR2 = 0.2688                   |                               |
| R indices (all data)              | R1 = 0.1930, wR2 = 0.3225                   |                               |
| Extinction coefficient            | n/a                                         |                               |
| Largest diff. peak and hole       | 0.576 and -0.497 e.Å <sup>-3</sup>          |                               |
